# Supplementary material for: Exome sequencing of hepatitis B virus–associated hepatocellular carcinoma
Source: Springer Nature journal article supplement (doi:10.1038/ng.2391), 2012-08-26
Supplement: 41588_2012_BFng2391_MOESM8_ESM.pdf [file 41588_2012_BFng2391_MOESM8_ESM.pdf]

## Supplementary Information

### Exome sequencing of hepatitis B virus-associated hepatocellular carcinoma

Jian Huang<sup>1,2,3,4,7</sup>, Qing Deng<sup>1,2,7</sup>, Qun Wang<sup>1,2,7</sup>, Kun-Yu Li<sup>2</sup>, Ji-Hong Dai<sup>2</sup>, Niu Li<sup>1,2</sup>, Zhi-Dong Zhu<sup>3</sup>, Bo Zhou<sup>1,2</sup>, Xiao-Yan Liu<sup>1,2</sup>, Rui-Fang Liu<sup>1,2</sup>, Qian-Lan Fei<sup>2</sup>, Hui Chen<sup>2</sup>, Bing Cai<sup>5</sup>, Boping Zhou<sup>4</sup>, Hua-Sheng Xiao<sup>3</sup>, Lun-Xiu Qin<sup>6</sup>, Ze-Guang Han<sup>1,2,\*</sup>

<sup>1</sup>Human Genome Center of Rui-Jin Hospital, Shanghai Jiaotong University School of Medicine, 197 Rui-Jin II Road, Shanghai 200025, China;

<sup>2</sup>Shanghai-MOST Key Laboratory for Disease and Health Genomics, Chinese National Human Genome Center at Shanghai, 351 Guo Shou-Jing Road, Shanghai 201203, China;

<sup>3</sup>National Engineering Center for Biochip at Shanghai, Shanghai 201203, China;

<sup>4</sup>The Third People's Hospital of Shenzhen, Shenzhen 518020, China.

<sup>5</sup>Department of Hepatobiliary Surgery, Wuxi People's Hospital of Nanjing Medical University, Wuxi 214023, China;

<sup>6</sup>Liver Cancer Institute & Zhongshan Hospital, Fudan University, 180 Feng Lin Road, Shanghai 200032, China;

<sup>7</sup>These authors contributed equally to this work.

**\*Correspondence should be addressed to Ze-Guang Han.** Chinese National Human Genome Center at Shanghai, 351 Guo Shou-Jing Road, Shanghai 201203, China; Tel: +86-21-50801325; Fax: +86-21-50800402; Email: hanzg@chgc.sh.cn.

## Supplementary Note

**Illumina/Solexa sequencing.** The extracted genomic DNA was randomly sonicated to produce fragment of 300-800 bp, which were then polished with T4 DNA polymerase and T4 polynucleotide kinase. NimbleGen linkers were added to the polished DNA fragments using T4 DNA ligase. The ligated products were then hybridized to the capture array according to the manufacturer's protocol, and the enriched DNA fragments were eluted and amplified with ligation-mediated PCR through the linkers added to the exonic DNA fragments. Before the second run of library construction, qPCR was performed to estimate the degree of enrichment of the exonic sequences. A minimum requirement of an 80-fold enrichment was achieved for all of the libraries prepared for the next procedure. The enriched exonic DNA was randomly blunt-end ligated with DNA ligase to fragments ranging in size from 2-5 kb. The resultant DNA products were sheared to 200 bp on average and were subjected to standard Illumina Genome Analyzer (GA) library preparation according to the Illumina protocol. The exome-enriched shotgun libraries were sequenced on the Illumina GA II platform, and single-end reads with an average size of 75 bp were generated. Image analysis and base calling were performed with the Genome Analyzer Pipeline version 1.3, using the default parameters. After removing reads containing sequencing adaptors and low-quality reads with more than five unknown bases, high

quality reads were aligned to the NCBI human reference genome (hg19) using MAQ<sup>1</sup> with the default parameters. To identify potential mutations, we performed local realignments of the BWA-aligned reads using the Genome Analysis Tool Kit (GATK)<sup>2</sup>. The raw lists of potential somatic substitutions were called by using VarScan (v2.2) based on the MAQ alignments<sup>3</sup>. After data analysis, SNVs were considered to be of interest if they met the following criteria: (1) variants should have Phred-like scaled consensus scores or SNP quality scores > 20; (2) variants should have mapping qualities > 30; (3) both the tumors and the matched normal samples should be covered more than 10-fold at each genomic position being compared; (4) the average base quality for a given genomic position should be at least 15 in both the tumors and the normal samples; (5) variants should be supported by at least 10% of the total reads in the tumors if no high-quality, variant-supporting reads are allowed in the normal controls; (6) variants should be supported by at least five reads in the tumors; (7) after cross-referencing of the potential somatic mutations against the dbSNP and SNP datasets of the 1000 Genomes Project (<http://www.1000genomes.org>), any mutations present in these datasets must be filtered out; and (8) to manage the false positives associated with pseudo-genes and repeat sequences, simulated reads (80 bp in length) containing the potential mutations must be generated and aligned to the reference genome. If more than 10% of the simulated variant-containing

reads of a given variant cannot be uniquely mapped to the reference genome, this variant must be discarded.

**ABI SOLiD sequencing.** DNA was randomly fragmented by sonication into fragments in the target range of 150-180 bp. Then, the DNA fragments were end-repaired to produce blunt-ended fragments, and subsequently ligated to SOLiD-specific universal sequencing adaptors and size-selected. The correctly sized ligation products were nick-translated and PCR-amplified to generate the Prepped Library. The library hybridization was performed at 65 °C for 24 hours, and the captured hybrids were selected using magnetic beads. An emulsion PCR reaction was then performed, and the templates were enriched and modified for deposition onto a glass slide. The slides were the site of massively parallel sequencing performed by ligation to generate a monoclonal 50-bp sequence read from each template bead. On the basis of the size of the target region, the sequence coverage, and the number of libraries, an eight-partition deposition chamber for each single-flow cell, or octet, was used for each sample. SOLiD™ BioScope™ software was used for multiple rounds of data analysis, including mapping or aligning the reads to a reference genome and generating a \*.bam file after the completion of the mapping and pairing. BioScope™ software uses the diBayes tool to identify single nucleotide polymorphisms (SNPs). This

tool utilizes the color-space reads, the quality values, the reference sequence, and the error information from each SOLiD™ slide as the input to call the SNPs. The diBayes package performs an independent SNP analysis at each position in the reference, using either a Bayesian or frequentist algorithm. The frequentist algorithm is employed when the coverage is for a given position is high (for example, 60×). Given the assumption that the errors will follow a Poisson distribution, the frequentist algorithm calculates the probability of the null hypothesis that the observed valid dicolor mismatches are errors. If the probability of the null hypothesis is too low, the hypothesis is rejected and the position is deemed a SNP. The Bayesian algorithm is used when the coverage of the position is not particularly high. The Bayesian algorithm evaluates the posterior probability of the existence of a heterozygote or a non-reference homozygote at the position in question. On the basis of the probability of the SNP evidence being a mis-color call, a position error, or a probe error, the Bayesian algorithm uses the prior probability of the position being a heterozygote and the probability of the observation being correct. The probabilities are calculated from the quality values of the color calls, from the frequencies of dicolor read mismatches as a function of the positions in a read, or from the frequencies of mismatches as the function of the 6-mer probe prefix, respectively. The detection of indel variants using a split-read technique is achieved using BioScope™ software's small indel

(insertion and deletion) caller with the BAM files produced from the fragment library types. The small indel pipeline determines the high-quality calls for insertions and deletions in two stages. In the first stage, the pipeline evaluates the gapped alignments on a bead-by-bead basis. In the second stage, the indel caller takes these gap alignments, forms pileups, filters the pileups based on specific heuristics, determines the zygosity, and annotates the indel sequences. This procedure results in concisely annotated and highly accurate indel calls. For fragment libraries, indel sizes up to 11 for deletions and 3 for insertions are considered valid.

**Identification of candidate somatic mutations.** To identify candidate somatic mutations using two massively parallel sequencing platforms, as described in **Supplementary Figure 2**, we first found potential SNP loci in the exomes of sequenced tumors (primary tumors and/or PVTs) using Illumina/Solexa and ABI SOLiD<sup>TM</sup> sequencing data and the SOAPsnp and BioScope<sup>TM</sup> software tools respectively, with default parameters. The raw data produced by the two massively parallel sequencing platforms were first mapped to the reference genome (hg19); 122,574 and 124,208 potential base substitutions were identified in the ten tumor genomes with the SOAPsnp and BioScope programs respectively, based on Illumina/Solexa and ABI SOLiD sequencing platforms. Next, candidate variation sites were identified that met the following prerequisites: 1)

homozygous genotypes in the matched, non-tumorous liver samples; 2) potential base substitution mutations in the primary tumor and PVTT samples compared with the genotypes of the matched, non-tumorous liver samples; 3) loci containing base substitutions that were not deposited in the dbSNP or 1000Genomes databases; 4) loci located in exons and splice sites; After being subjected to these four filters, 550 and 579 candidate somatic mutations that had been identified with the Illumina/Solexa and ABI SOLiD sequencing platforms, respectively, were combined with additional sequencing data for further analyses and comparisons. The following filters were applied to classify the candidate somatic mutations: 1) the number of sequence reads with base substitutions was  $\leq 2$  in the non-tumorous liver samples and 2) the number of sequence reads with base substitutions was  $\geq 2$  in the primary tumor and PVTT samples. On the basis of these criteria, the somatic mutations were classified into three groups: 475 somatic mutations that were simultaneously identified with Solexa and SOLiD sequencing, 256 with Solexa sequencing alone and 301 with SOLiD sequencing alone. These somatic mutations were annotated to determine their mutation types.

**Bioinformatic tools.** The SeattleSeq Annotation server provides annotations for both known and novel SNPs. These annotations include dbSNP rs IDs, gene names and accession numbers, SNP functions (*e.g.*,

missense), protein positions and amino acid changes, conservation scores, HapMap frequencies, PolyPhen predictions, and clinical associations. (<http://gvs.gs.washington.edu/SeattleSeqAnnotation/>). The somatic mutations identified in the HCC samples were further filtered using the annotation information provided by SeattleSeq Annotation. The functional effects of the mutations were predicted by PolyPhen<sup>4-6</sup> (<http://genetics.bwh.harvard.edu/pph2/>).

**Loss-of-function by RNA interference screen for cell viability.** Each sequence was filtered using NCBI BLAST to validate its specificity and to reduce off-target effects. The siRNA target sequences are listed in **Supplementary Table 12**. The double-stranded siRNA oligonucleotides were chemically synthesized by Shanghai GenePharma Co. Ltd. and were dissolved overnight in a 20- $\mu$ M solution of double-distilled H<sub>2</sub>O treated with diethylpyrocarbonate (DEPC, Sigma). The cell-based siRNA screen was performed as follows:  $3 \times 10^3 - 5 \times 10^3$  cells per well were seeded in 96-well culture plates. Likewise, the siRNA duplexes were arranged in 96-well culture plates and delivered into the HCC cells with Lipofectamine<sup>TM</sup>2000 (Invitrogen), according to the manufacturer's instructions. The siRNA concentration was optimized to minimize off-target effects. The cells were incubated at 37 °C for 72 hours prior to the cell viability assay. The cell viability was measured using the Cell



Counting Kit-8 (Dojindo Laboratories), a sensitive colorimetric assay for the determination of the number of viable cells in cell proliferation and cytotoxicity studies, according to the manufacturer's instructions. A microplate spectrophotometer (Bio-Tek, MQX200) was used to collect the raw data from 96-well plates twice with a 450-nm filter. A FAM-labeled siRNA was used as a transfection control, two irrelevant siRNAs served as negative controls, and two siRNAs against AURKA were positive controls in each plate. The functional assays of these mutated genes employed the following 8 cell lines: Huh-7, PLC/PRF/5, Focus, WRL68, MHCC-97L, MHCC-97H, HCC-LM3 and HCC-LM6.

The raw absorbance value from each plate were normalized and analyzed according to a previously described method<sup>7</sup>. First, the output profile of cell viability of each cell line was evaluated and illustrated in **Supplementary Figure 13b**. The one-sample t-test was used to examine the mean difference between each sample and the known population mean. The results indicate that the knockdown of the majority of the genes had no significant effect on cell viability in 4 of the 8 HCC cell lines. (one sample t-test, WRL68,  $P = 0.0801$ ; PLC/PRF/5,  $P = 0.3028$ ; HCC-LM3,  $P = 0.1617$ ; HCC-LM6,  $P = 0.5181$ ). However, the loss of function of these genes may contribute to the cell viability of the other 4 HCC lines (one-sample t-test, Focus,  $P = 0.0111$ ; Huh-7,  $P = 0.0001$ ; MHCC-97L,  $P = 0.0013$ ; MHCC-97H,  $P = 0.0436$ ). Second, to identify

hits from the screen data, phenotypes were scored for their statistical significance. As a measure of the evidence for loss-of-function phenotype, a score was calculated according to formula  $Z = \frac{y-M}{s}$ , where  $y$  and  $s$  are the mean and standard deviation, respectively, of the triplicate normalized value of each siRNA, and  $M$  is the median of the distribution of the  $y$  values for all of the siRNAs. Meanwhile, the  $P$  value was calculated using one-tailed t-test to assess the statistical significance of the difference. As shown in **Supplementary Fig. 13c**, positive results in the loss-of-function assay in each cell line were determined to promote viability when  $Z < -5$  and  $P < 0.01$  and to inhibit cell viability when  $Z > 5$  and  $P < 0.01$ . Third, we selected the genes that produced at least one siRNA hit in two or more cell lines as candidates for further research. The total  $Z$  score is the sum of the  $z$  scores of the siRNAs hits against an effector gene, and the average  $P$  value is the average of the  $P$  values of the siRNA hits against the effector gene. To validate the effect on cell viability of RNA interference against the mutated genes, the gene expression levels and siRNA-mediated knockdown were evaluated in the corresponding cell lines using quantitative PCR.

## Supplementary discussion

Mutational signatures are known to carry the specific imprints of previous mutagenic exposures or DNA repair defects; hence, these signatures provide insights into cancer etiology. Chronic HBV infection is the most common etiology of HCC in Asian countries. The integration of the HBV viral DNA into the human genome can induce chromosomal instability, resulting in rearrangements and deletions. However, viral DNA integration could not be directly responsible for the elevated number of transversions noted above. As previously mentioned, dietary exposure to AFB1 increases the risk of HCC commonly found in Asia. AFB1-exposed individuals frequently have distinct TP53 mutations, such as G>T transversions in codon 249 (AGG>AGT) and a characteristic mutational spectrum dominated by C:G>A:T mutations<sup>8-11</sup>. Importantly, the C:G>A:T transversion was significantly enriched in half (5/10) of all of the HCC samples in this study, implying that AFB1 exposure may be a critical contributor in these HBV-associated HCCs, although the AGG>AGT mutation at codon 249 of *TP53* was not found in the ten HCC patients. However, whether AFB1 leads to the T:A>A:T transversion is uncertain. We suspect that other carcinogens are involved in the oncogenesis of HBV-associated HCC. Aristolochic acid, a known carcinogen that has been associated with the development of progressive renal fibrosis, human urothelial cancer, and rodent tumors, is a

component of plant extracts, including herbal remedies<sup>12</sup>. Aristolochic acid has been implicated in the T:A>A:T transversion in some cancer genes, including *TP53* and *Ras*<sup>13,14</sup>. Vinyl chloride, a gas used in the plastics industry, is known as a carcinogen that causes liver cancers, including HCC<sup>15</sup>. This carcinogen may cause the T:A>A:T transversion.

Among the genes carrying two confirmed non-silent mutations, *ELMO1* encodes a Rac1 regulator that controls vascular morphogenesis<sup>16</sup>; DSE is considered a tumor rejection antigen<sup>17</sup>; and germline nonsynonymous variants of *CSMD3* have been associated with familial colorectal cancer<sup>18</sup>. Despite their low mutation frequencies, the prospect that these mutated genes may play significant roles in HCC oncogenesis should be further investigated.

Of 7 potential cancer-associated genes, as indicated by RNAi screen, in addition to *VCAM1* and *CDK14*, *HOXA1* has been associated with oncogenic transformation and anchorage-independent survival<sup>19,20</sup>. Whether and how these genes might be involved in HCC oncogenesis should be examined in future research.

## References

1. Li, H., Ruan, J. & Durbin, R. Mapping short DNA sequencing reads and calling variants using mapping quality scores. *Genome Res.* **18**, 1851-1858 (2008).

2. McKenna, A. *et al.* The Genome Analysis Toolkit: a MapReduce framework for analyzing next-generation DNA sequencing data. *Genome Res.* **20**, 1297-1303 (2010).
3. Koboldt, D.C. *et al.* VarScan: variant detection in massively parallel sequencing of individual and pooled samples. *Bioinformatics* **25**, 2283-2285 (2009).
4. Ramensky, V., Bork, P. & Sunyaev, S. Human non-synonymous SNPs: server and survey. *Nucleic Acids Res.* **30**, 3894-3900 (2002).
5. Sunyaev, S., Ramensky, V. & Bork, P. Towards a structural basis of human non-synonymous single nucleotide polymorphisms. *Trends Genet.* **16**, 198-200 (2000).
6. Sunyaev, S. *et al.* Prediction of deleterious human alleles. *Hum. Mol. Genet.* **10**, 591-597 (2001).
7. Boutros, M., Brás, L.P. & Huber, W. Analysis of cell-based RNAi screens. *Genome Biol.* **7**, R66 (2006).
8. Hussain, S.P., Schwank, J., Staib, F., Wang, X.W. & Harris C.C. TP53 mutations and hepatocellular carcinoma: insights into the etiology and pathogenesis of liver cancer. *Oncogene* **26**, 2166–2176 (2007).
9. Aguilar, F., Hussain, S.P. & Cerutti, P. Aflatoxin B1 induces the transversion of G→T in codon 249 of the p53 tumor suppressor gene in human hepatocytes. *Proc. Natl. Acad. Sci. USA* **90**,

- 8586–8590 (1993).
10. Hsu, I.C. *et al.* Mutational hotspot in the p53 gene in human hepatocellular carcinomas. *Nature* **350**, 427–428 (1991).
  11. Besaratinia, A., Kim, S.I., Hainaut, P. & Pfeifer, G.P. In vitro recapitulating of TP53 mutagenesis in hepatocellular carcinoma associated with dietary aflatoxin B1 exposure. *Gastroenterology* **137**, 1127–1137 (2009).
  12. Arlt, V.M., Stiborova, M. & Schmeiser, H.H. Aristolochic acid as a probable human cancer hazard in herbal remedies: a review. *Mutagenesis* **17**, 265–277 (2002).
  13. Moriya, M. *et al.* TP53 Mutational signature for aristolochic acid: an environmental carcinogen. *Int. J. Cancer* **129**, 1532–1536 (2011).
  14. Wang, Y. *et al.* Aristolochic acid–induced carcinogenesis examined by ACB–PCR quantification of H–Ras and K–Ras mutant fraction. *Mutagenesis* **26**, 619–628 (2011).
  15. Barbin, A. Etheno–adduct–forming chemicals: from mutagenicity testing to tumor mutation spectra. *Mutat. Res.* **462**, 55–69 (2000).
  16. Epting, D. *et al.* The Rac1 regulator ELMO1 controls vascular morphogenesis in zebrafish. *Circ. Res.* **107**, 45–55 (2010).
  17. Sasatomi, T. *et al.* Expression of tumor rejection antigens in colorectal carcinomas. *Cancer* **94**, 1636–1641 (2002).
  18. Gylfe, A.E. *et al.* Somatic mutations and germline sequence variants

- in patients with familial colorectal cancer. *Int. J. Cancer* **127**, 2974–2980 (2010).
19. Zhang, X. *et al.* Human growth hormone–regulated HOXA1 is a human mammary epithelial oncogene. *J. Biol. Chem.* **278**, 7580–7590 (2003).
20. Zhang, X. *et al.* HOXA1 is required for E–cadherin–dependent anchorage–independent survival of human mammary carcinoma cells. *J. Biol. Chem.* **281**, 6471–6481 (2006).

## **Supplementary Figures**

**Supplementary Figure 1. The average depth of coverage of the 10 HCC patients whose exomes were sequenced on two types of massively parallel sequencing platforms.**

**Supplementary Figure 2. A flowchart for identifying somatic mutations based on the Illumina/Solexa and SOLiD sequencing data.**

**Supplementary Figure 3. The classification and evaluation of 682 potential somatic mutations.**

**Supplementary Figure 4. The identification of somatic insertion and deletion variants in 10 HCC samples.**

**Supplementary Figure 5. Twenty-five somatic indel variants were manually confirmed by using Integrative Genomics Viewer (IGV).**

**Supplementary Figure 6. The diversity of somatic mutations in advanced HCC.**

**Supplementary Figure 7. Functional categories of the mutated genes.**



**Supplementary Figure 8. Mutated genes harboring two non-silent mutations confirmed by Sanger sequencing.**

**Supplementary Figure 9. Genotype comparison and analysis of some of the HCC cell lines with an Affymetrix Genome-Wide Human SNP Array 5.0 dataset.**

**Supplementary Figure 10. An ARID1A knockdown via RNA interference promoted cell migration and invasion in MHCC-97L and MHCC-97H cells.**

**Supplementary Figure 11. Functional analysis of ARID1A via RNAi knockdown in various HCC cell lines.**

**Supplementary Figure 12. The mutated genes were further examined via Sanger sequencing in additional HCC samples.**

**Supplementary Figure 13. Screen of knockdowns by RNA interference of the mutated genes in eight HCC cell lines.**

**Supplementary Figure 14. The efficacies of RNA interference against VCAM1, TMEM2, CDK14, HOXA1, TMEM35, ELL and CSNK1G3 in the HCC cells were evaluated with real-time quantitative PCR.**

**Supplementary Figure 15. The effects of the mutated genes on cell behaviors determined using cell-based RNA interference (RNAi).**

**Supplementary Figure 16. Functional assays of VCAM1 and CDK14 in various HCC cell lines.**

**Supplementary Figure 17. The expression patterns in HCC samples of 7 cancer-associated genes from the RNAi screen.**

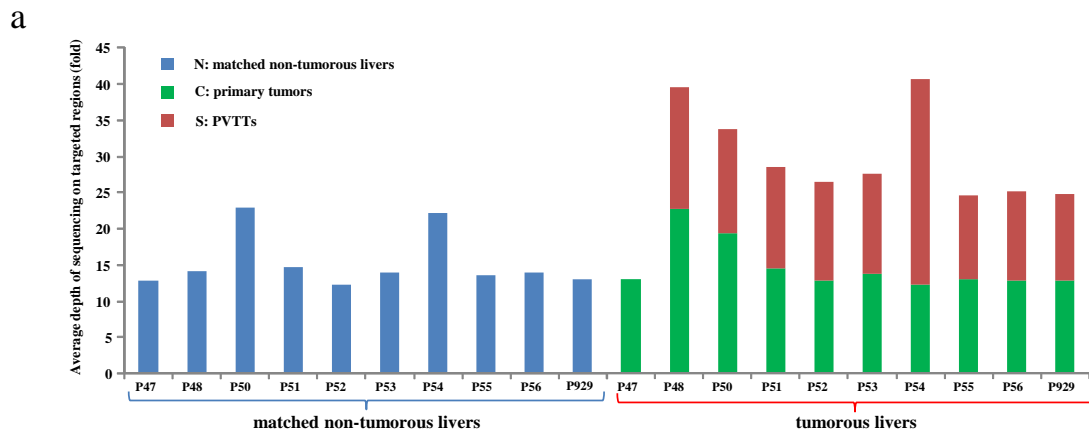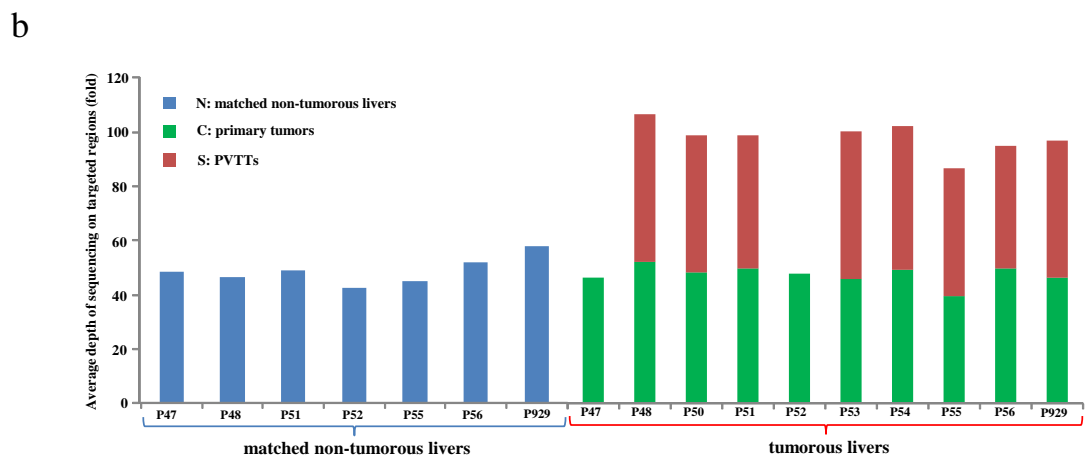

**Supplementary Figure 1. The average depth of coverage of the 10 HCC patients whose exomes were sequenced on two types of massively parallel sequencing platforms. The average depth of coverage of the targeted bases of each sample is shown. The average depth of coverage of each tumor sample was calculated as the sum of the depths of coverage of the primary tumor and the PVTT samples, as evaluated with the Illumina/Solexa (a) and ABI SOLiD sequencing platforms (b).**

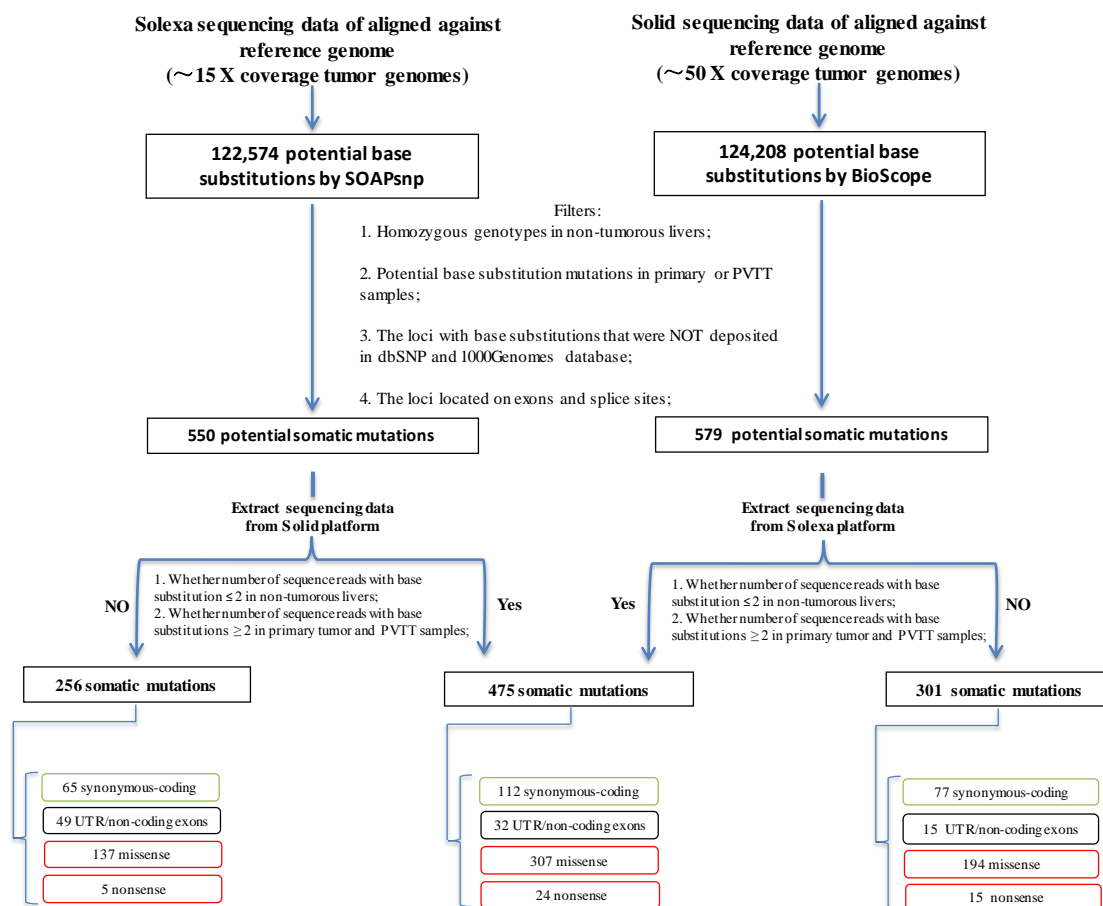

**Supplementary Figure 2. A flowchart for identifying somatic mutations based on the Illumina/Solexa and SOLiD sequencing data.**

The raw data from the two massively parallel sequencing platforms were first mapped onto the reference genome (hg19). A total of 122,574 and 124,208 potential base substitutions were produced by the SOAPsnp and BioScope<sup>TM</sup> programs, respectively, based on data of the ten tumor exomes generated by the Illumina/Solexa and ABI SOLiD sequencing platforms. Next, the candidate single nucleotide variant mutations had to fulfill the following criteria: 1) homozygous genotypes detected in the matched, non-tumorous liver samples; 2) potential base substitution mutations in the primary tumor and PVTT samples compared with the

genotypes of the non-tumorous liver samples; 3) loci containing base substitutions not deposited in the dbSNP or 1000 Genomes databases and 4) loci located in exons and splice sites. After filtering, 550 and 579 candidate somatic mutations were proposed based on the Illumina/Solexa and ABI SOLiD sequencing data, respectively. We then subjected these sequencing data to further filtering based on the following requirements: 1) the number of sequence reads containing base substitutions was  $\leq 2$  in the non-tumorous liver samples and 2) the number of sequence reads containing base substitutions was  $\geq 2$  in both the primary tumor and PVTT samples. Finally, the somatic mutations were classified into three categories: 475 somatic mutations were simultaneously detected by both Solexa and SOLiD sequencing platforms, 256 only by Solexa sequencing and 301 only by SOLiD sequencing. These somatic mutations were annotated to determine the mutation types.

a

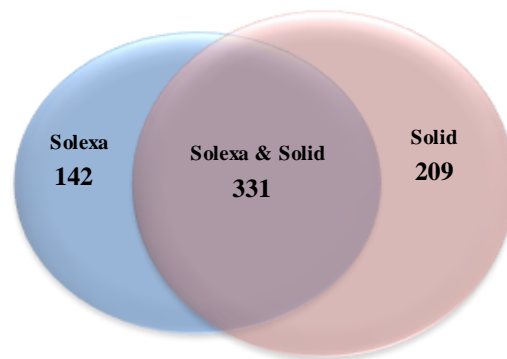

Non-silent mutations

b

| Non-silent somatic mutations identified in primary tumors or PVTs |     | Sanger sequencing                       |                               |                         |
|-------------------------------------------------------------------|-----|-----------------------------------------|-------------------------------|-------------------------|
|                                                                   |     | Number of performed PCR-Sanger sequence | Number of confirmed mutations | Confirmatory proportion |
| Solexa & Solid                                                    | 331 | 224                                     | 193                           | 86.2%                   |
| Solid                                                             | 209 | 41                                      | 17                            | 41.5%                   |
| Solexa                                                            | 142 | 131                                     | 16                            | 12.2%                   |

**Supplementary Figure 3. The classification and evaluation of 682 potential somatic mutations.** (a) The distribution of non-silent somatic mutations based on the Illumina/Solexa and SOLiD sequencing data. Of the total of 682 non-silent somatic mutations, 331 were supported by both the Illumina/Solexa and SOLiD sequencing data, 142 and 209 by only the Illumina/Solexa or SOLiD sequencing data, respectively. (b) The evaluation of the above three categories based on the different strategies was performed using conventional Sanger sequencing.

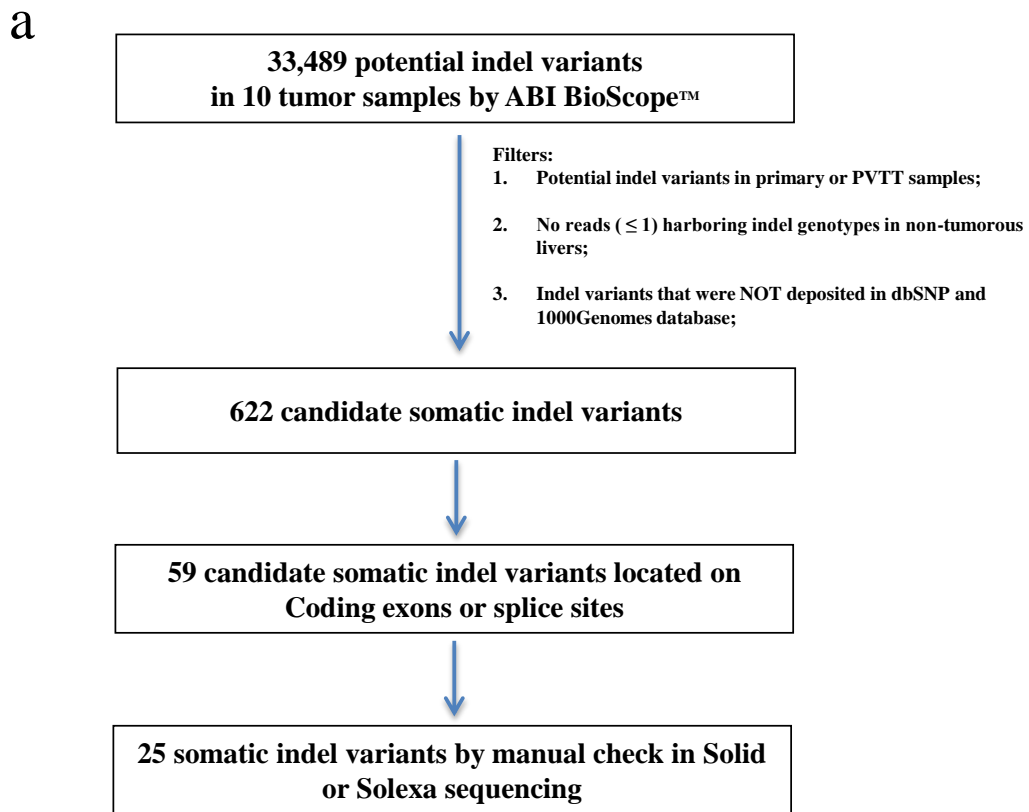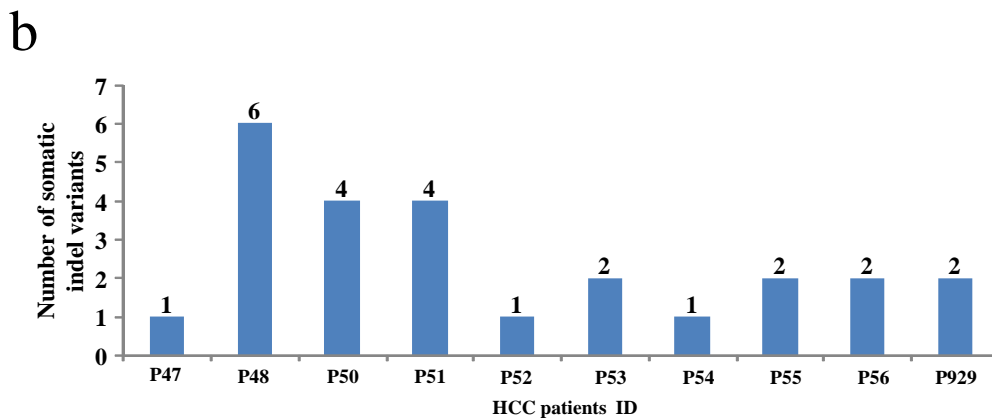

**Supplementary Figure 4. The identification of somatic insertion and deletion variants in 10 HCC samples. (a)** The flowchart used for identifying somatic insertion and deletion variants in the 10 HCC patients. **(b)** The distribution of the identified somatic indel mutations in the 10 HCC patients.

Gene:DCC; Chromosome location: chr18:50961544-50961544; Variant type: DELETION, del T

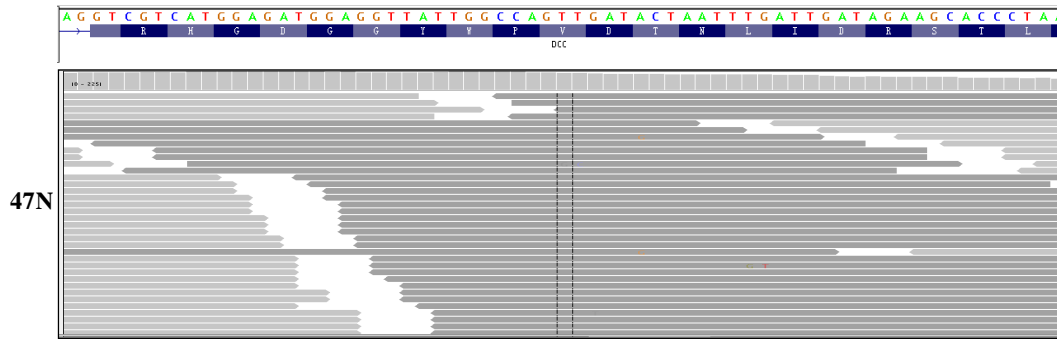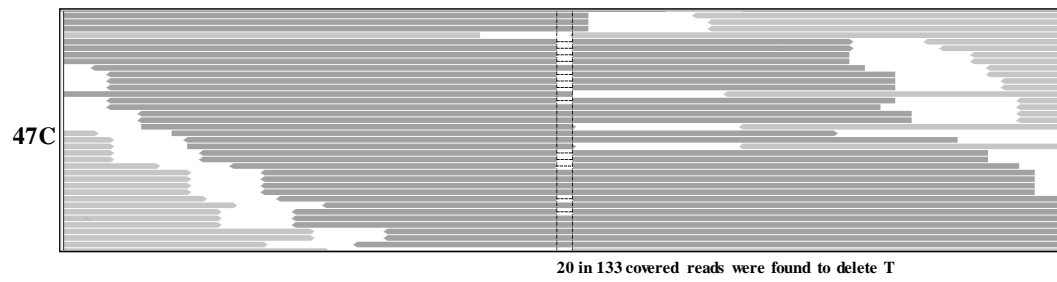

Gene:CTNNA3; Chromosome position: chr10:67680207-67680207; Variant type: INSERTION, ins T

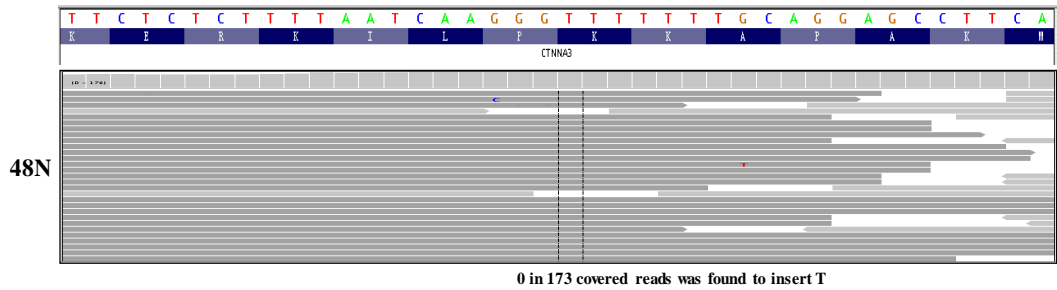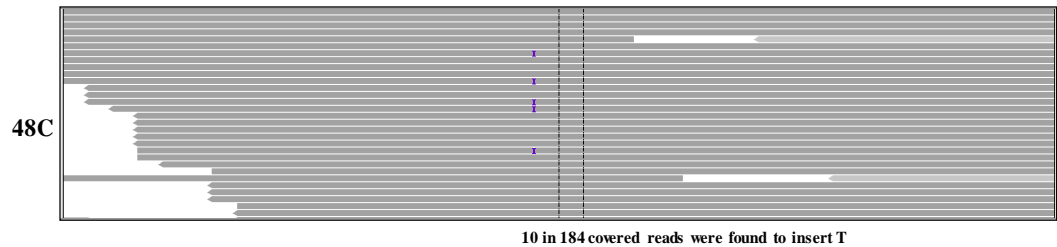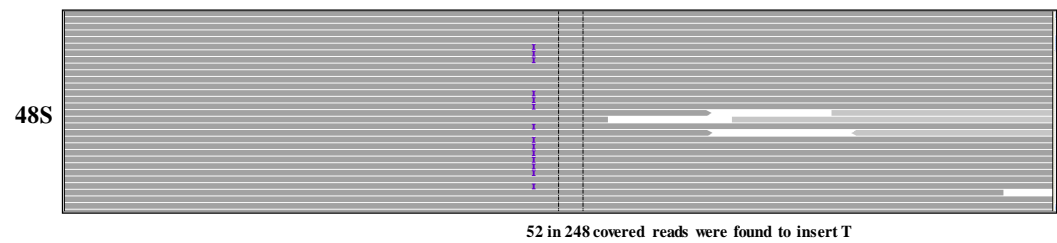



**EXD2 chr14:69697187-69697187 DELETION delA**

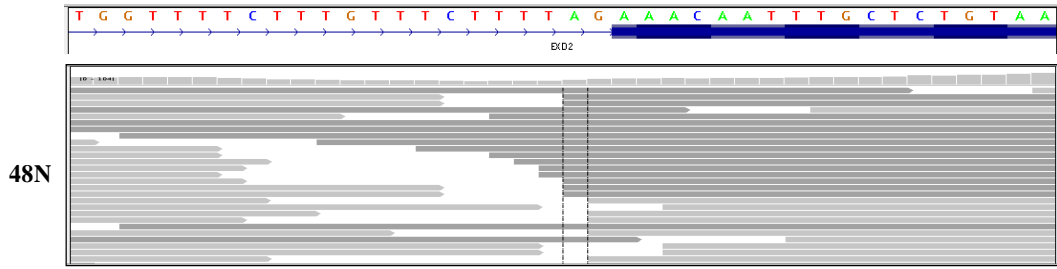

0 in 26 covered reads was found to delete A

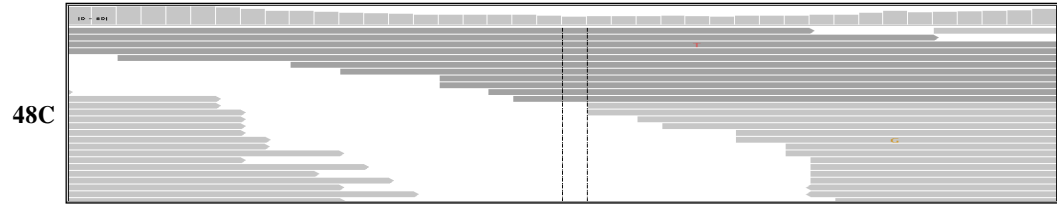

0 in 24 covered reads was found to delete A

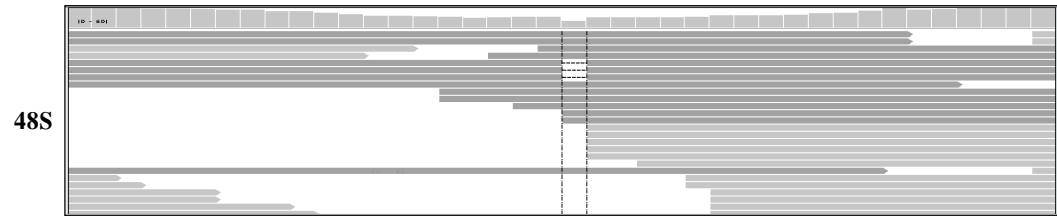

5 in 20 covered reads was found to delete A

**Gene: FSTL1; Chromosome position: chr3:120130742-120130743; Variant type: DELETION, delTG**

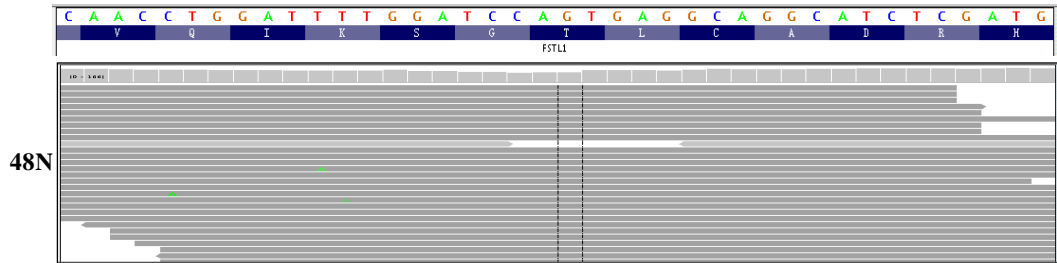

0 in 93~113 covered reads was found to delete TG

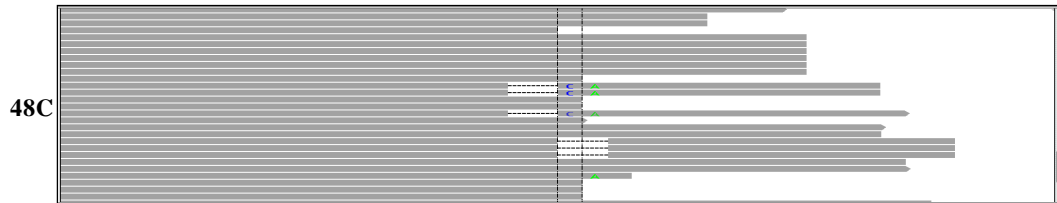

4 in 84~88 covered reads were found to delete TG

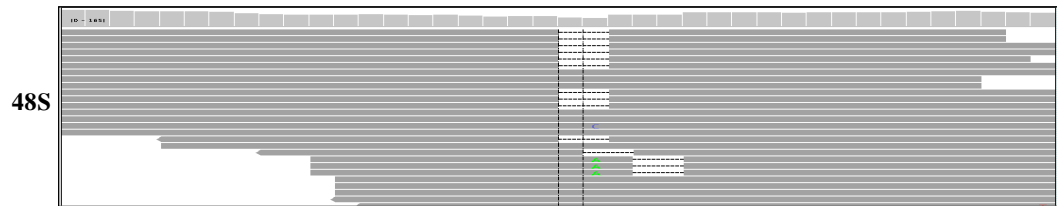

11 in 74~76 covered reads were found to delete TG

Gene: FZD1; Chromosome position: chr7:90894459-90894459; Variant type: INSERTION, insGCC

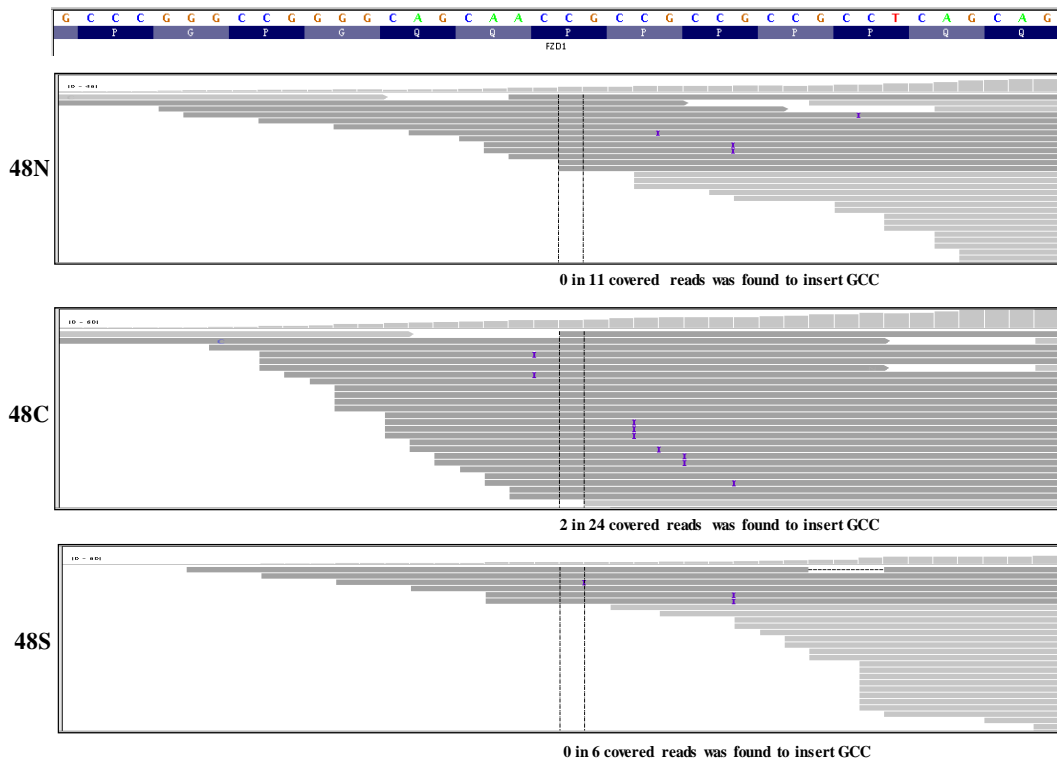

Gene: KIAA2018; Chromosome position: chr3:113373977-113373978; Variant type: DELETION, del GT

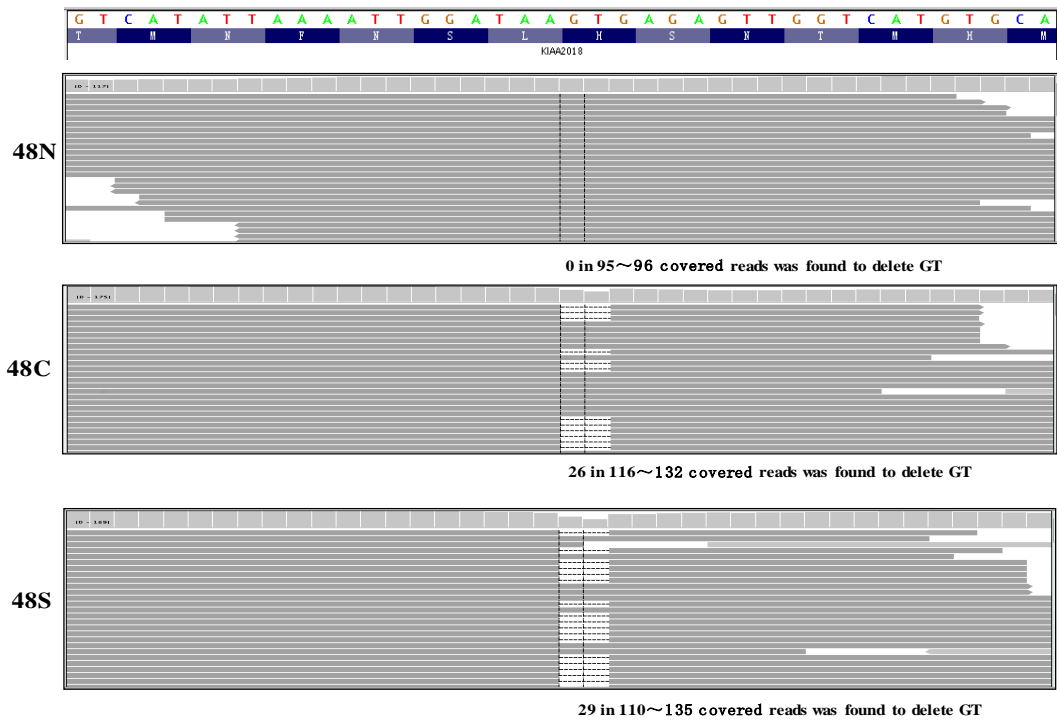

Gene:SOS1;Chromosome position: chr2:39281966-39281967;Variant type: DELETION, del TA

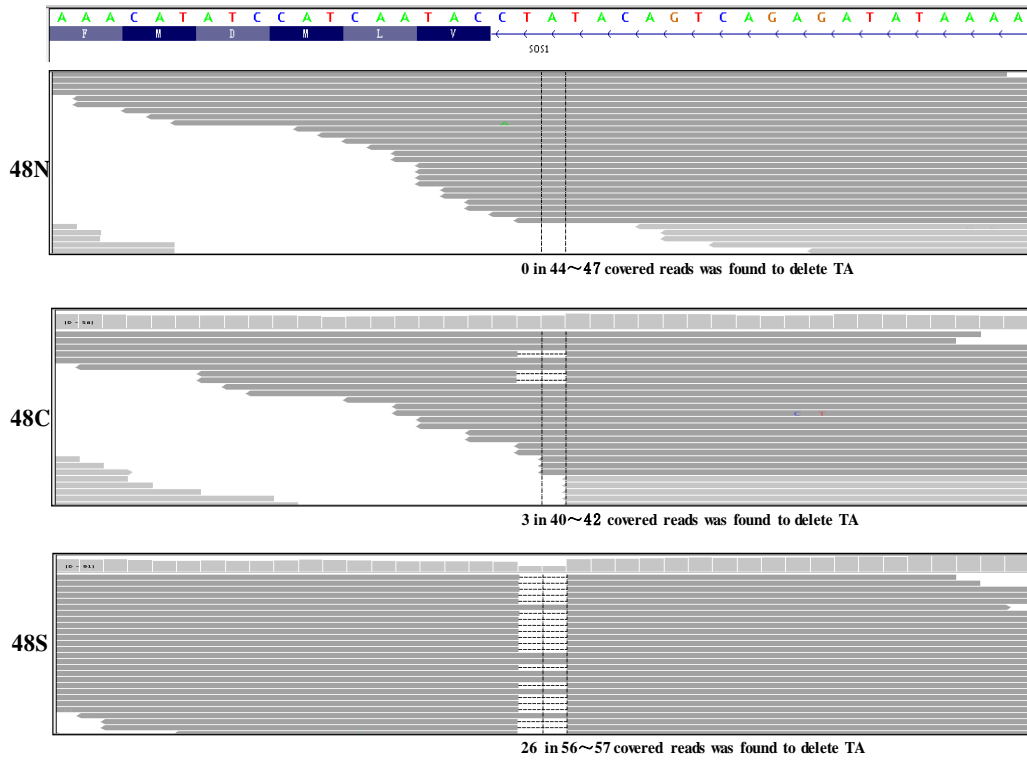

Gene: GPR52;Chromosome position: chr1:174418091-174418091;Variant type: DELETION,del A

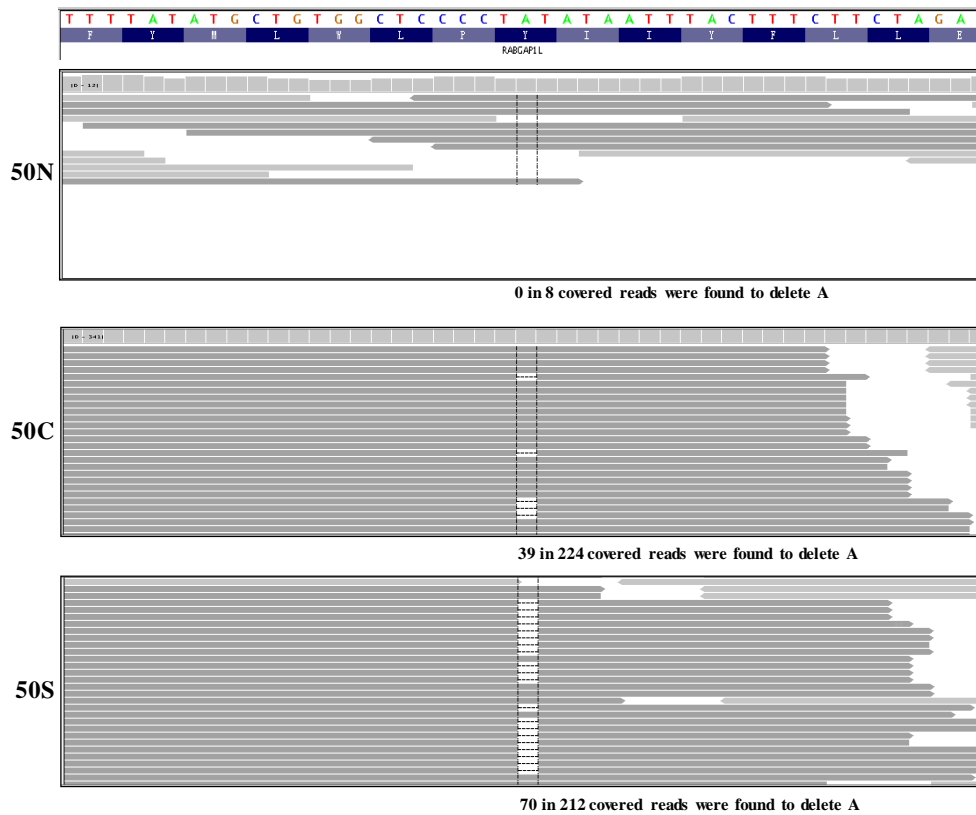

Gene: MCCC1; Chromosome position: chr3:182751780-182751780; Variant type: INSERTION, ins T

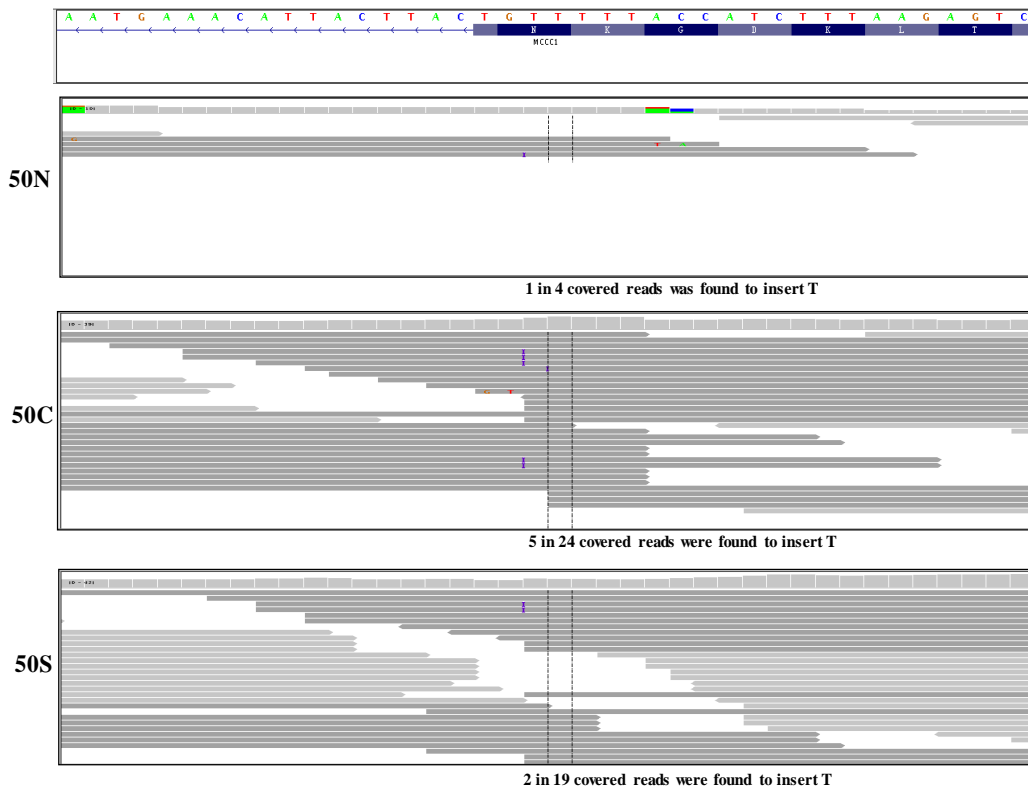

Gene: N4BP2L2; Chromosome position: chr13:33111105-33111108; Variant type: DELETION, del CACT

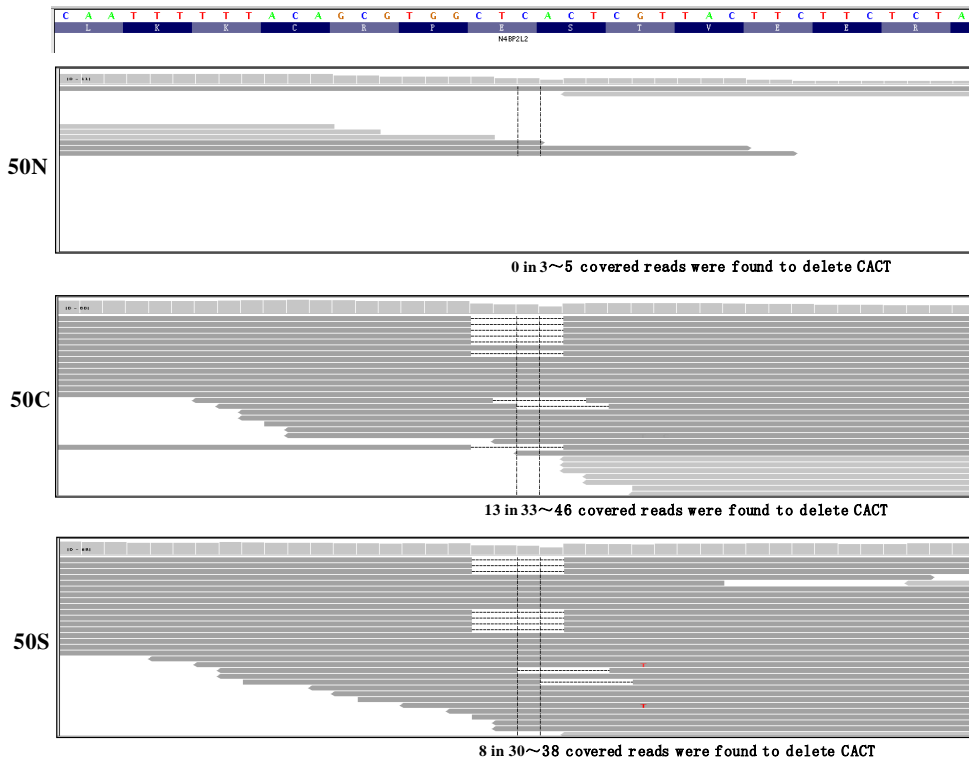

Gene:ZNF394; Chromosome position: chr7:99091315-99091318; Variant type:DELETION, del ATTG

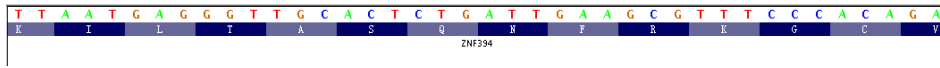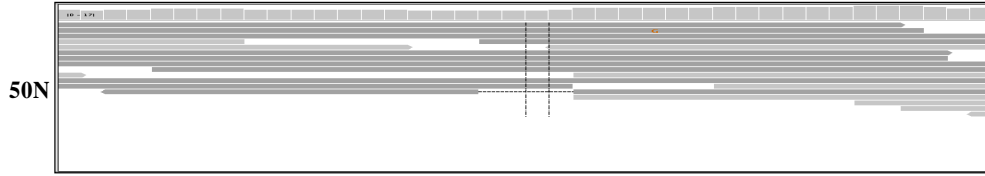

1 in 10~11 covered reads was found to delete ATTG

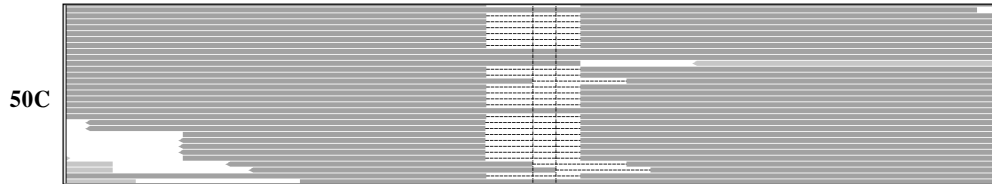

53 in 92~118 covered reads were found to delete ATTG

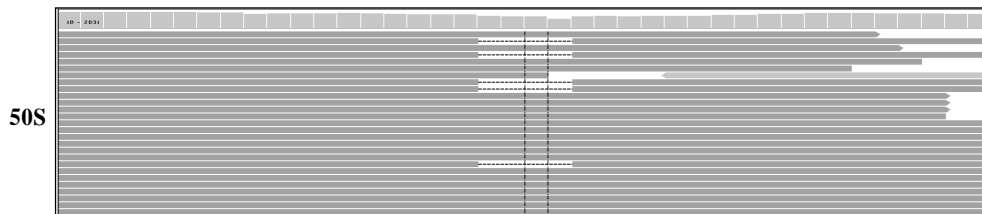

16 in 100~129 covered reads were found to delete ATTG

Gene:ARID2; Chromosome position: chr12:46242645-46242645; Variant type: DELETION, del CA

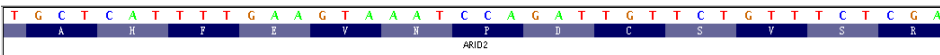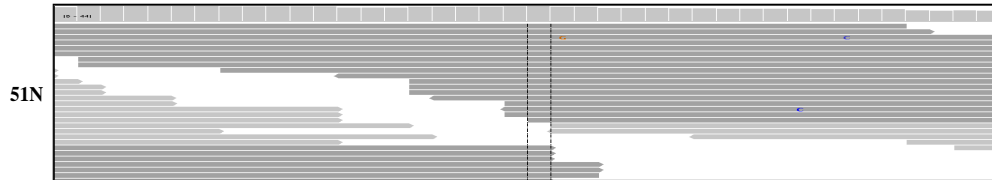

0 in 42 covered reads were found to delete CA

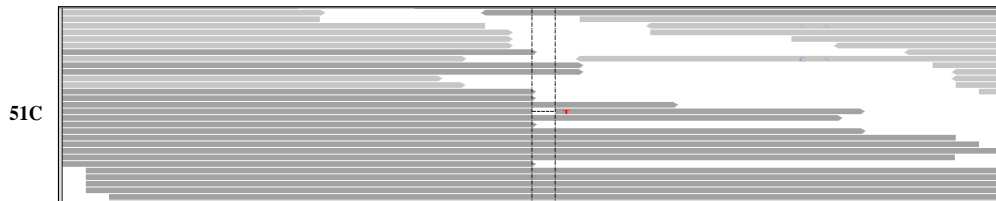

1 in 29~30 covered reads was found to delete CA

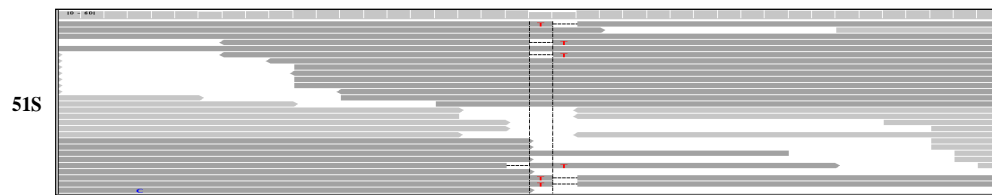

5 in 21~22 covered reads was found to delete CA

Gene: KEAP1; Chromosome position: chr19:10610396-10610396; Variant type: DELETION, del G

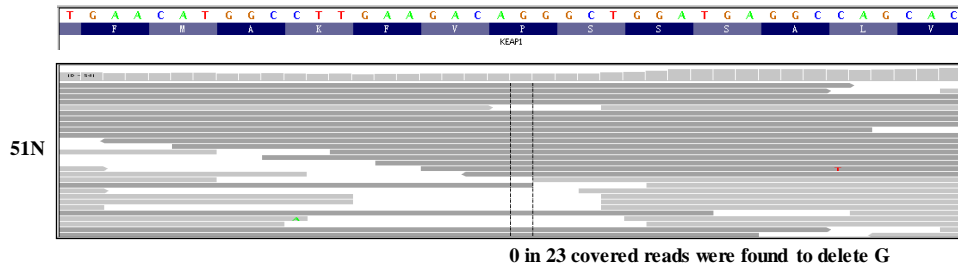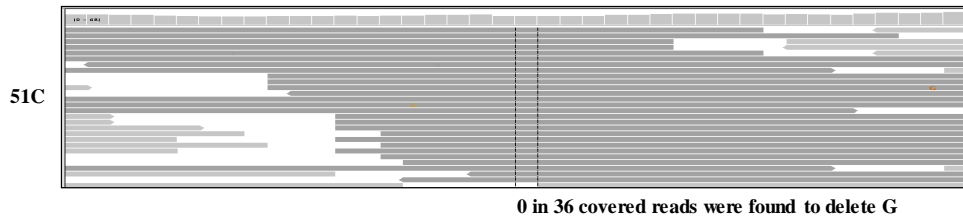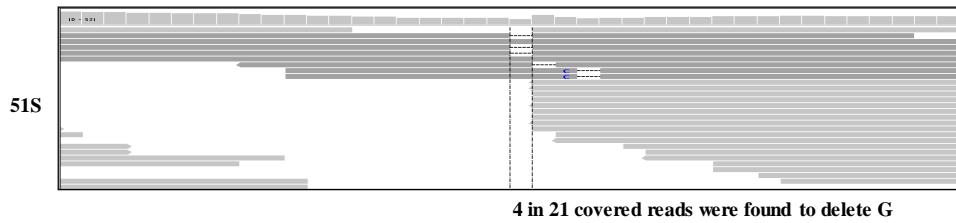

Gene: TRAPPC8; Chromosome position: chr18:29432469-29432469; Variant type: DELETION, del T

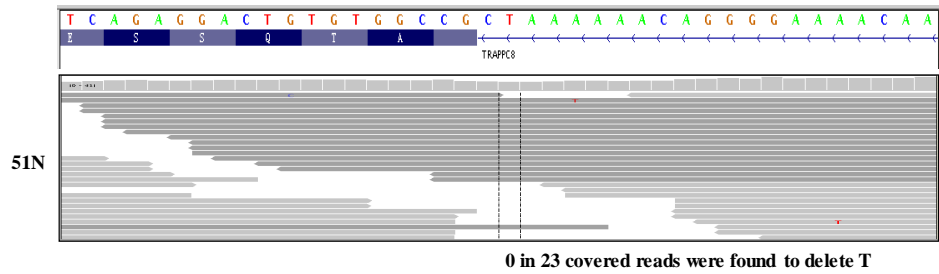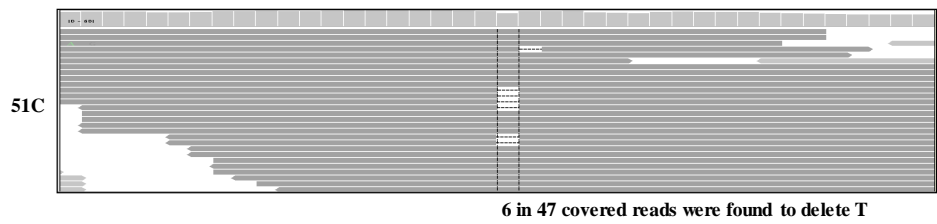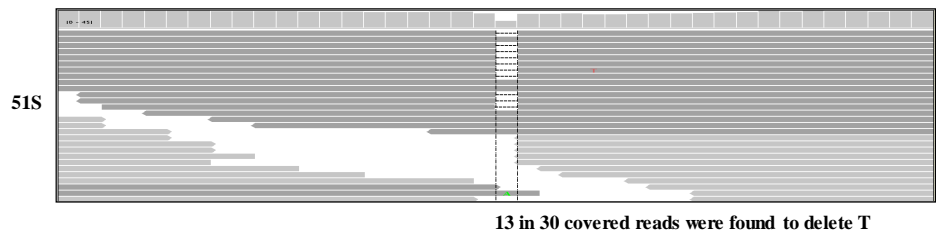

Gene: VILL; Chromosome position: chr3:38040434-38040434; Variant type: INSERTION, ins ACC

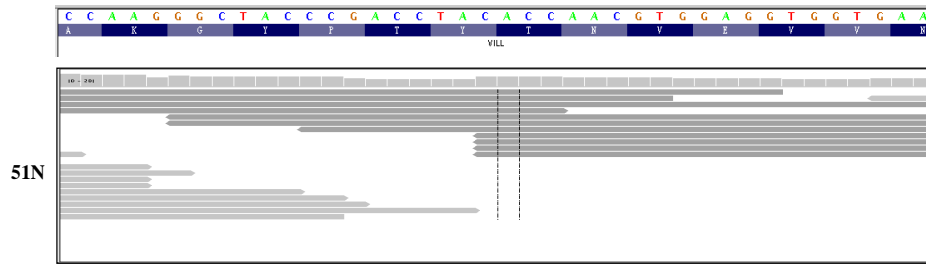

0 in 11 covered reads were found to insert ACC

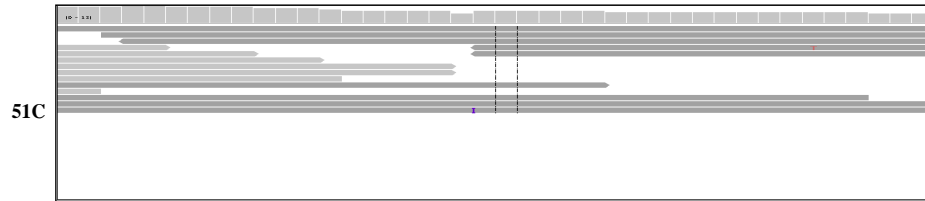

1 in 7 covered reads was found to insert ACC

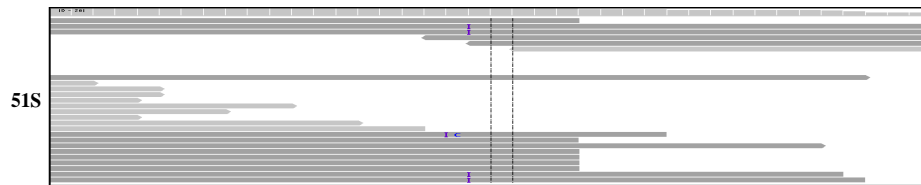

4 in 14 covered reads were found to insert ACC

Gene: PPP6R2; Chromosome position: chr22:50876663-50876665; Variants type: DELETION, delAGG

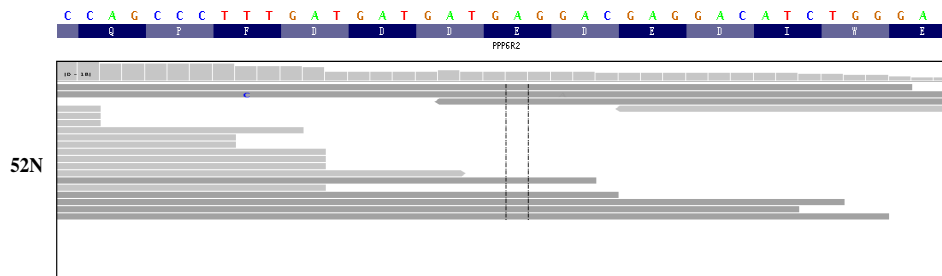

0 in 8 covered reads were found to delete AGG

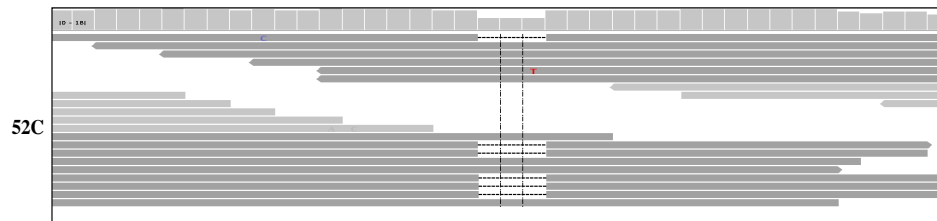

6 in 15 covered reads were found to delete AGG

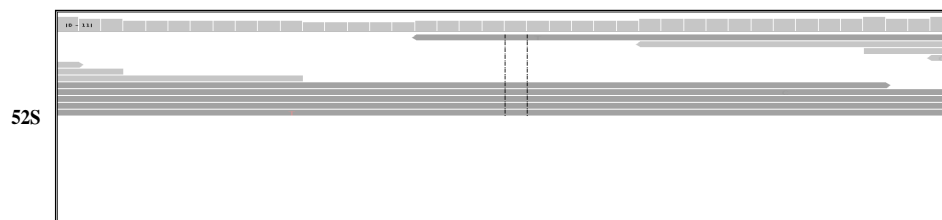

0 in 6 covered reads were found to delete AGG

Gene: OR2T4; Chromosome position: chr1:248525328-248525328; Variant type: INSERTION, ins TA

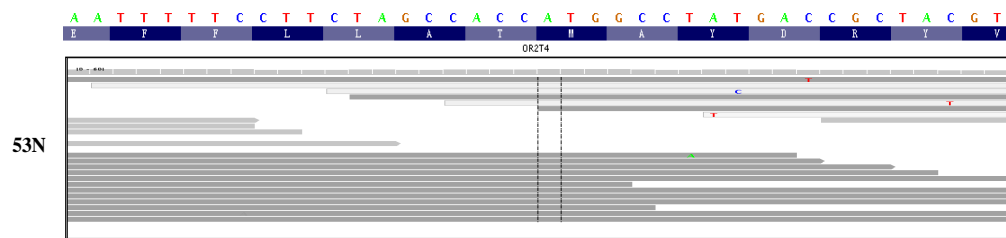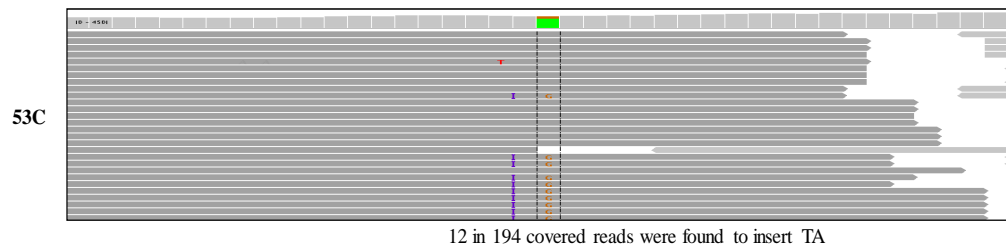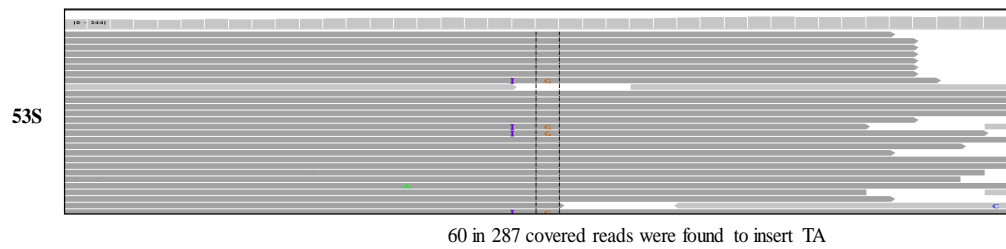



Gene:ZNF28; Chromosome position: chr19:53304469-53304470; Variant type: DELETION, del AT

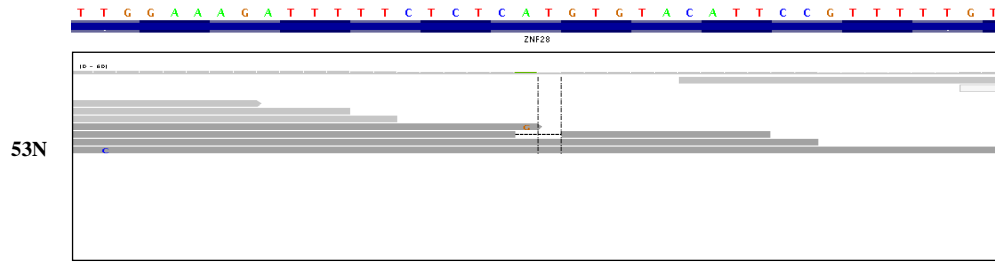

1 in 3~4 covered reads was found to delete AT

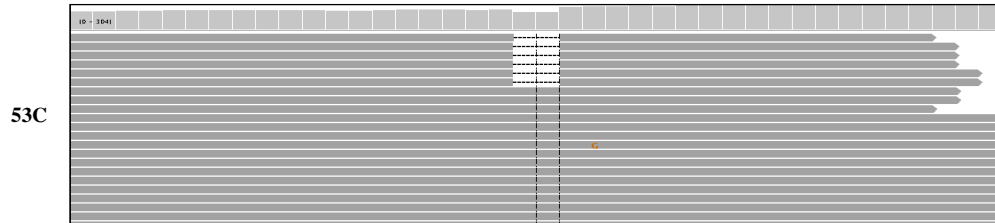

24 in 232~233 covered reads was found to delete AT

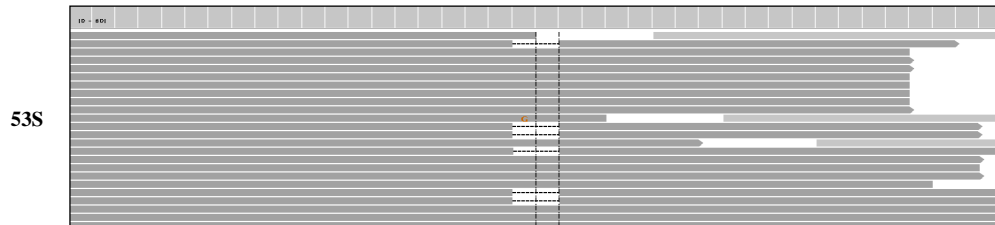

37 in 152~153 covered reads was found to delete AT

Gene: ADH4; Chromosome position: chr4:100048473-100048473; Variant type: INSERTION, insT

T A C A T G A T C C C C A G C C T G C G G T T G T A C A G T C C A G G G C T G C  
 C S G Y G A T T C D L A A

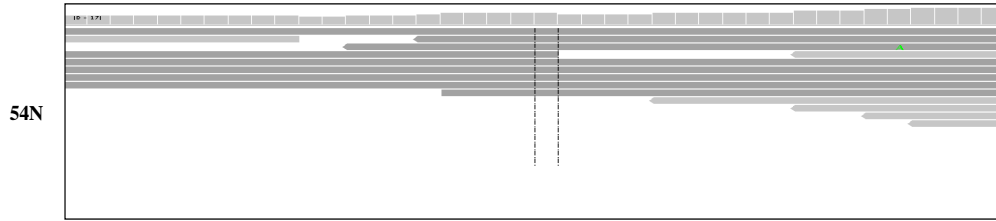

54N

0 in 9 covered reads were found to insert T

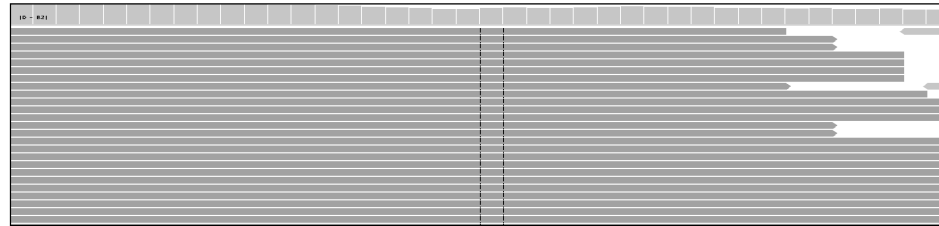

54C

0 in 57 covered reads were found to insert T

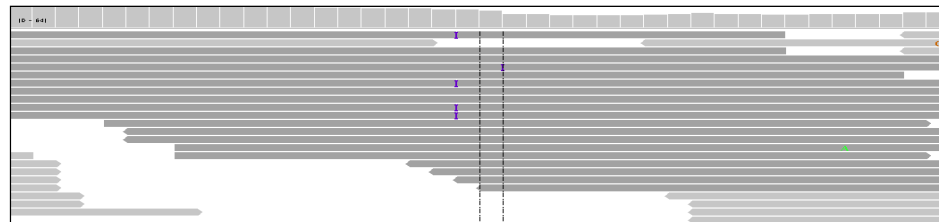

54S

12 in 50 covered reads were found to insert T

Gene: C14orf21; Chromosome position: chr14:24769849-24769849; Variant type: INSERTION, ins GGA

A T T G C T G G G G A G T G C T G C A G A G G A G G A G G A G G A G G A G  
 L L L G G S A A E E E E E E E E E E

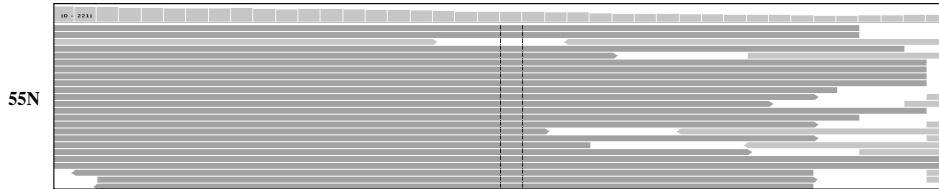

55N

0 in 116 covered reads were found to insert GGA

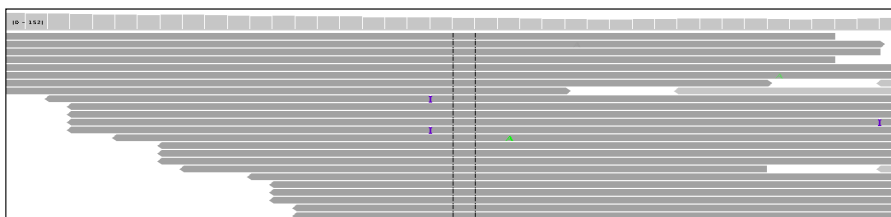

55C

2 in 81 covered reads were found to insert GGA

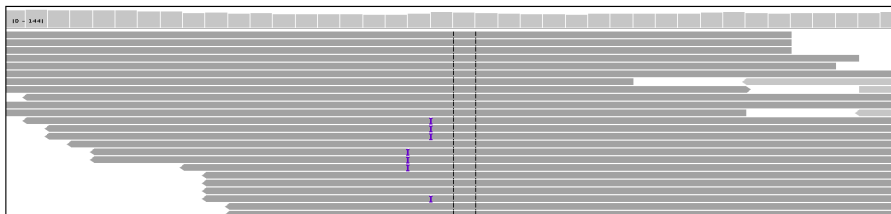

55S

4 in 93 covered reads were found to insert GGA

Gene: **PHLDB1**; Chromosome position: chr11:118498906-118498906; Variant type: **DELETION, delA**

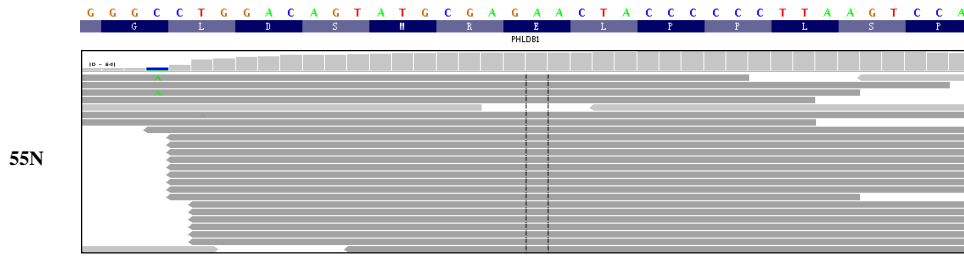

0 in 55 covered reads were found to delete A

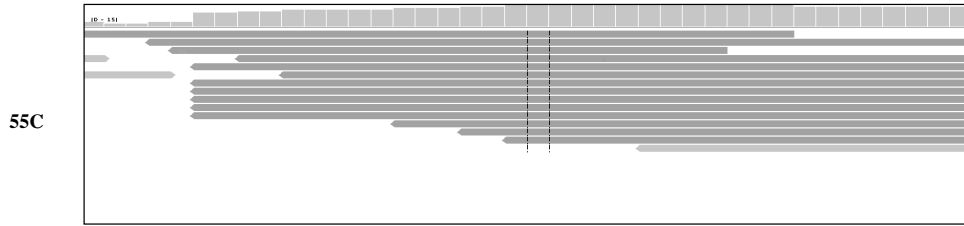

0 in 14 covered reads were found to delete A

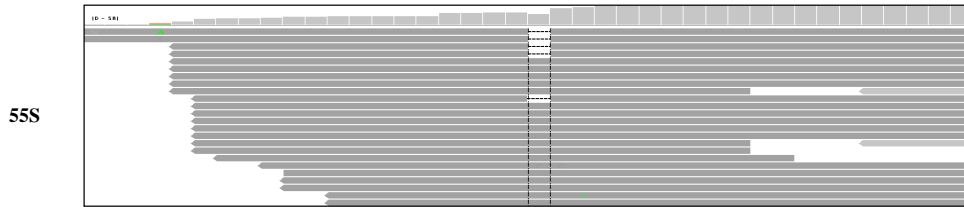

5 in 34 covered reads were found to delete A

Gene: **GFRA1**; Chromosome position: chr10:117884962-117884962; Variant type: **DELETION, delG**

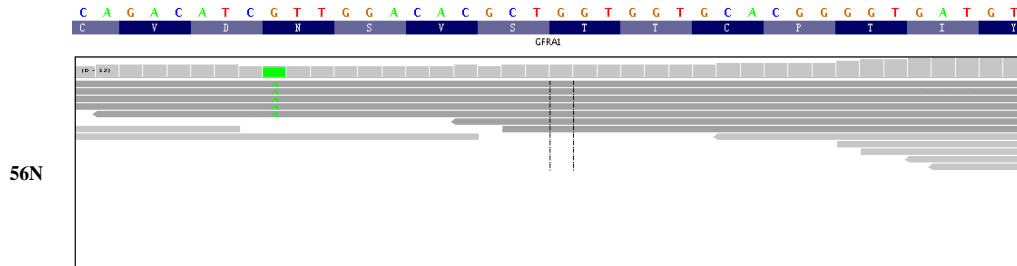

0 in 7 covered reads were found to delete G

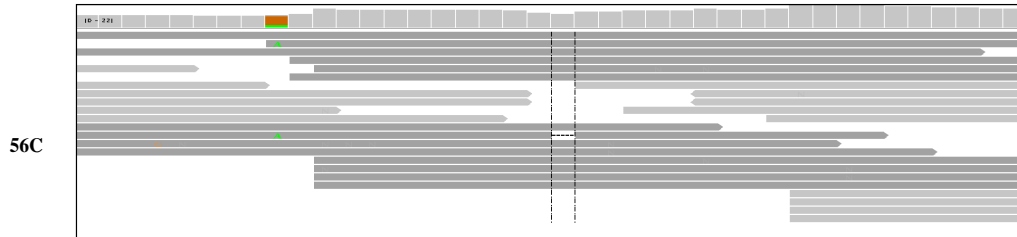

1 in 14 covered reads were found to delete G

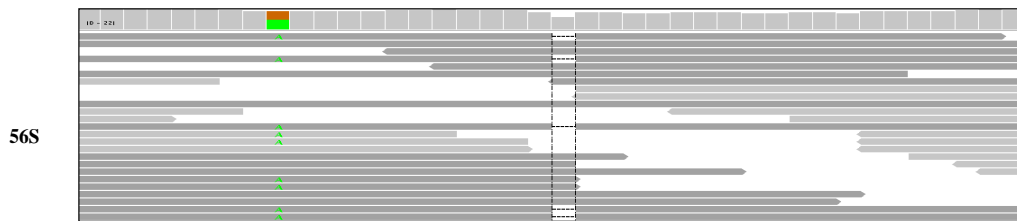

6 in 19 covered reads were found to delete G

Gene: MLL3; Chromosome position: chr7:151874148-151874148; Variant type: DELETION, delT

G A G T T T T G T T T T C T T G T T C C T T T T T T T G G T T C A A C A G A  
 T K N E Q E K K K P E V S  
 MLL3

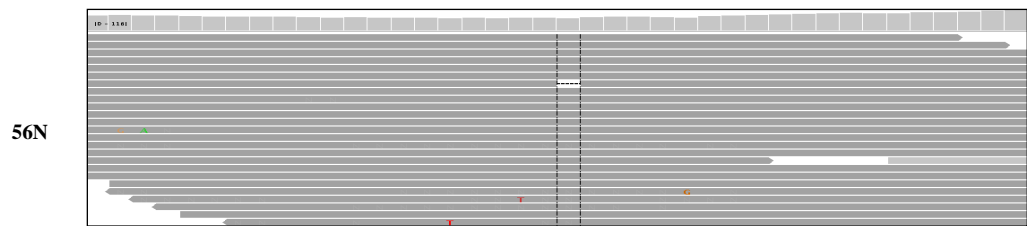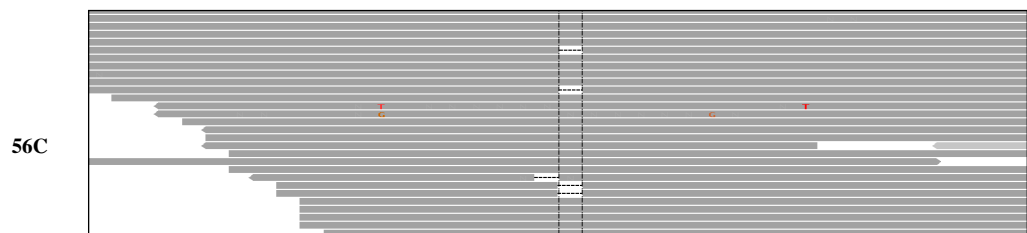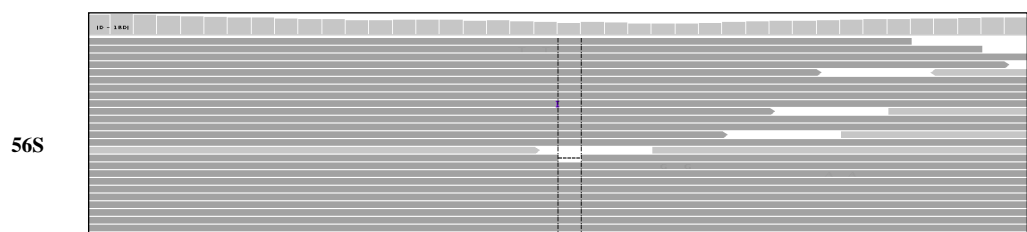

Gene: SIGLEC12; Chromosome position: chr19:52004791-52004791; Variant type: INSERTION, ins C

T C C G G C T T A C A T G G T C C C C T G C C C G G A A C C A G T A G C C A T G  
 R S V H D G A R F Y G H  
 SIGLEC12

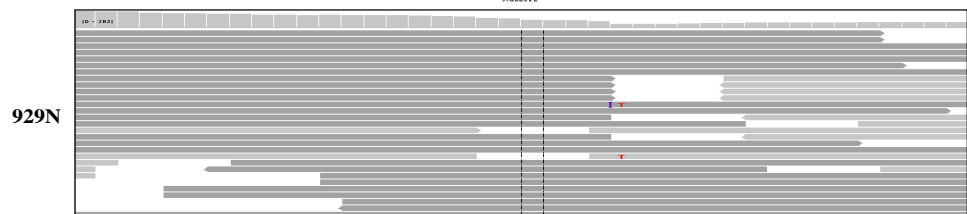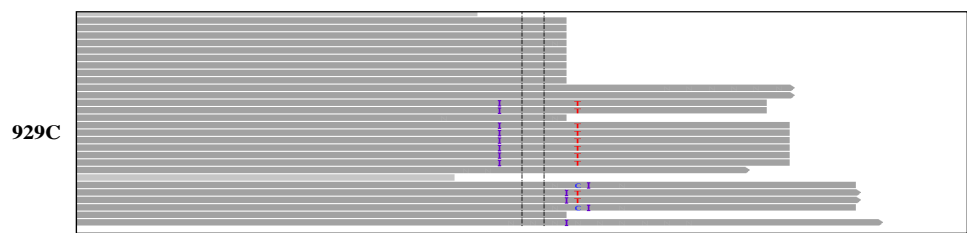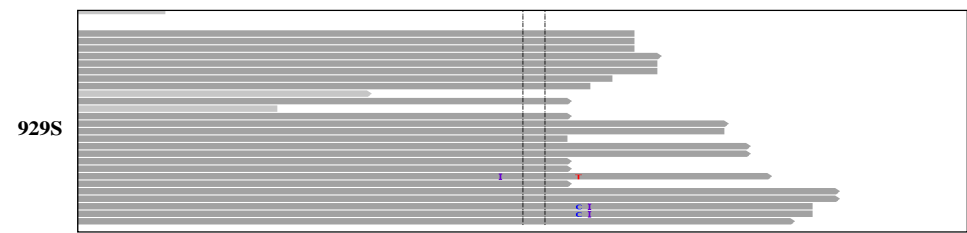

Gene: ZFP36L1; Chromosome position: chr14:69256768-69256768; Variant type: DELETION, delA

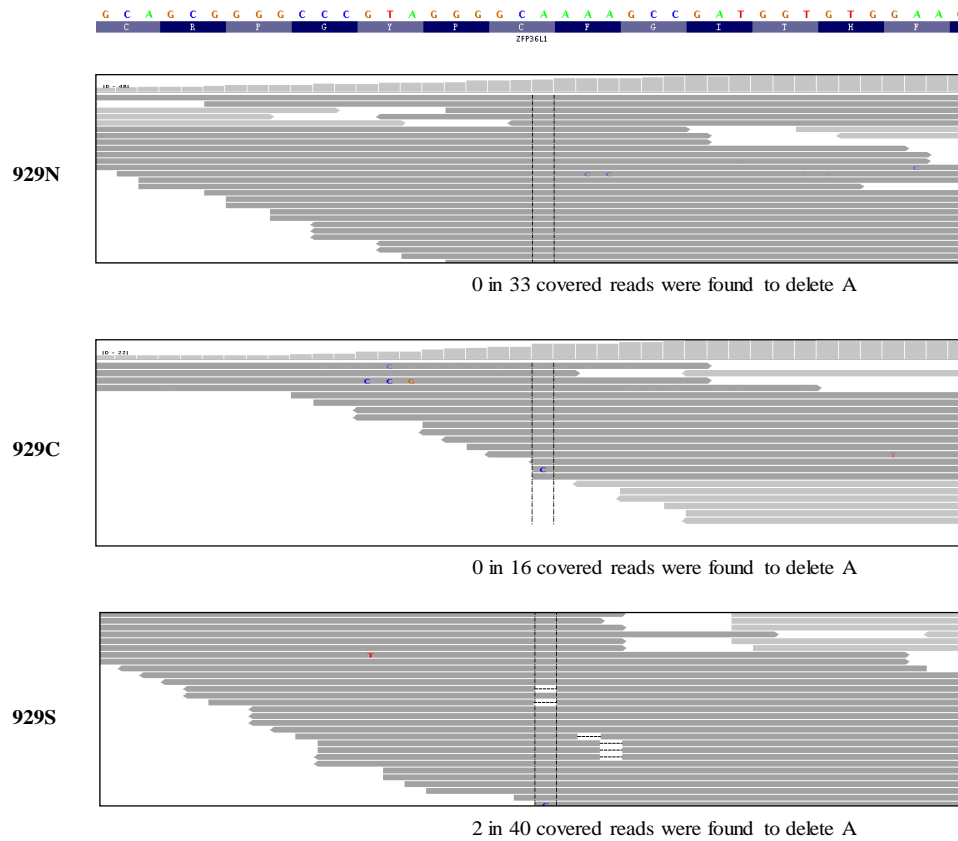

**Supplementary Figure 5. Twenty-five somatic indel variants were manually confirmed by using Integrative Genomics Viewer (IGV).**

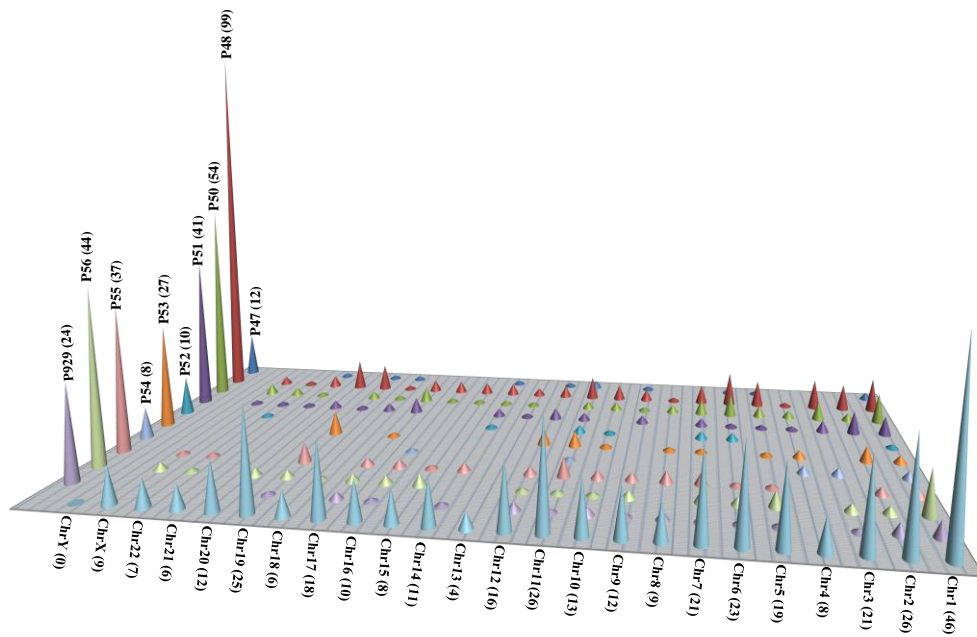

**Supplementary Figure 6. The diversity of somatic mutations in advanced HCC.** A three-dimensional map depicting the landscape of 356 non-synonymous somatic mutations, including 331 SNV mutations and 25 indels, distributed across 24 chromosomes in ten HCC patients. The total number of mutations in a given patient or chromosome is indicated within parentheses.

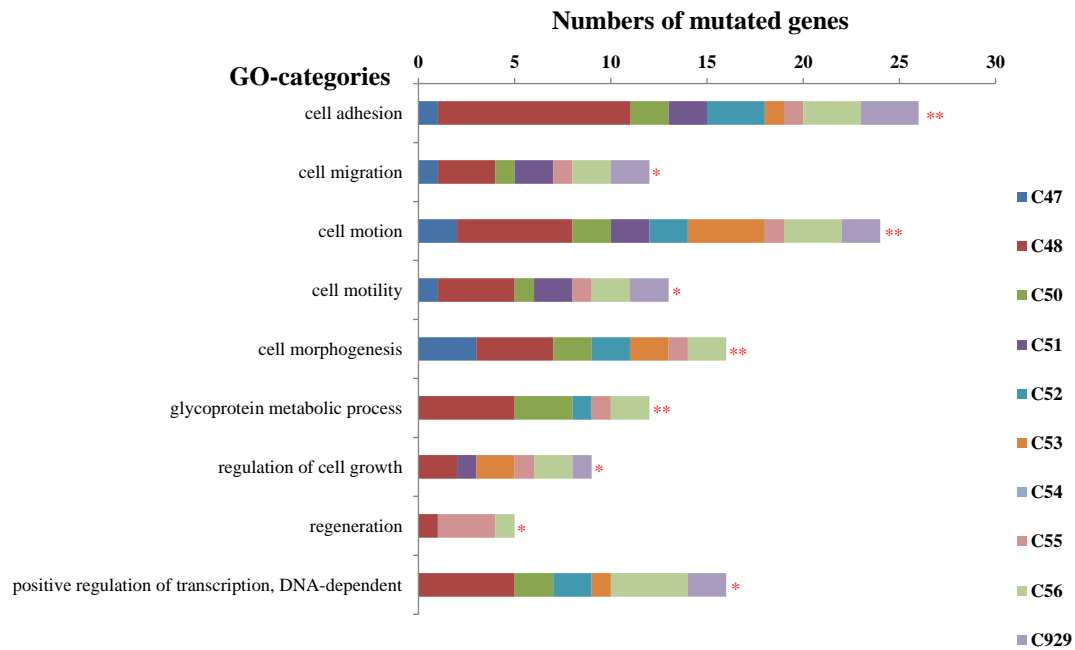

**Supplementary Figure 7. Functional categories of the mutated genes.**

The mutated genes were assigned to different Gene Ontology (GO) categories based on their biological processes and were statistically analyzed with all human genes as the background for comparison. \*P < 0.05, \*\*P < 0.01.

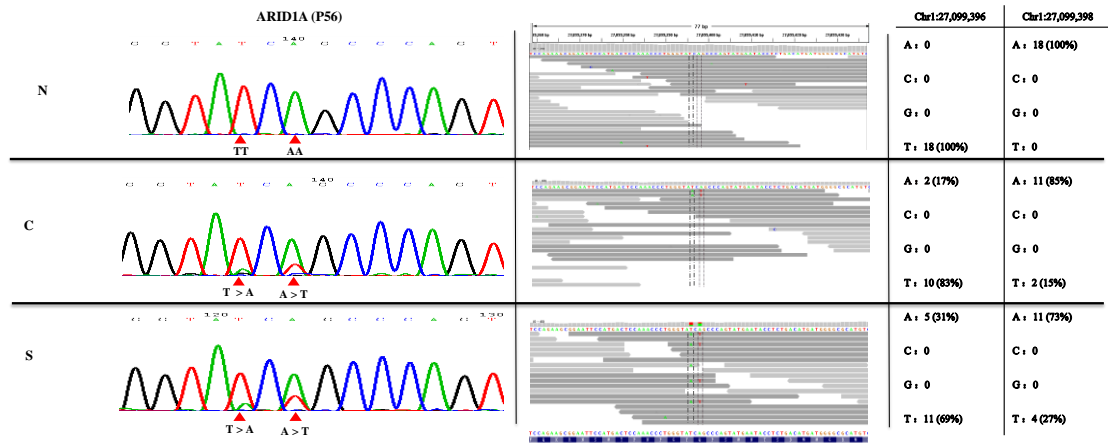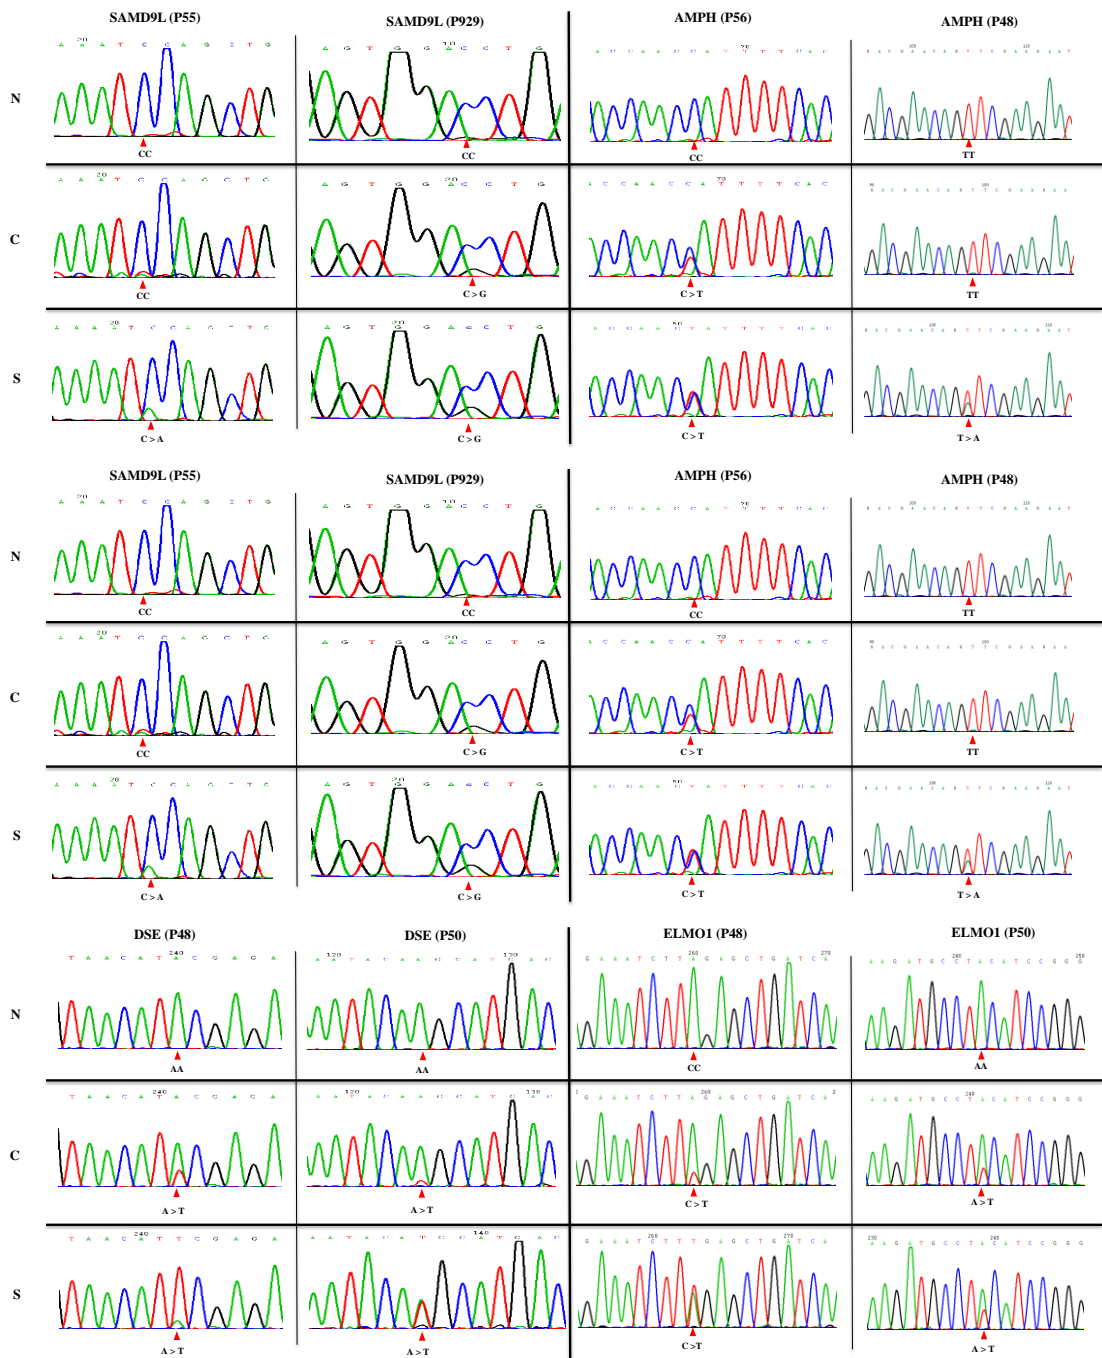



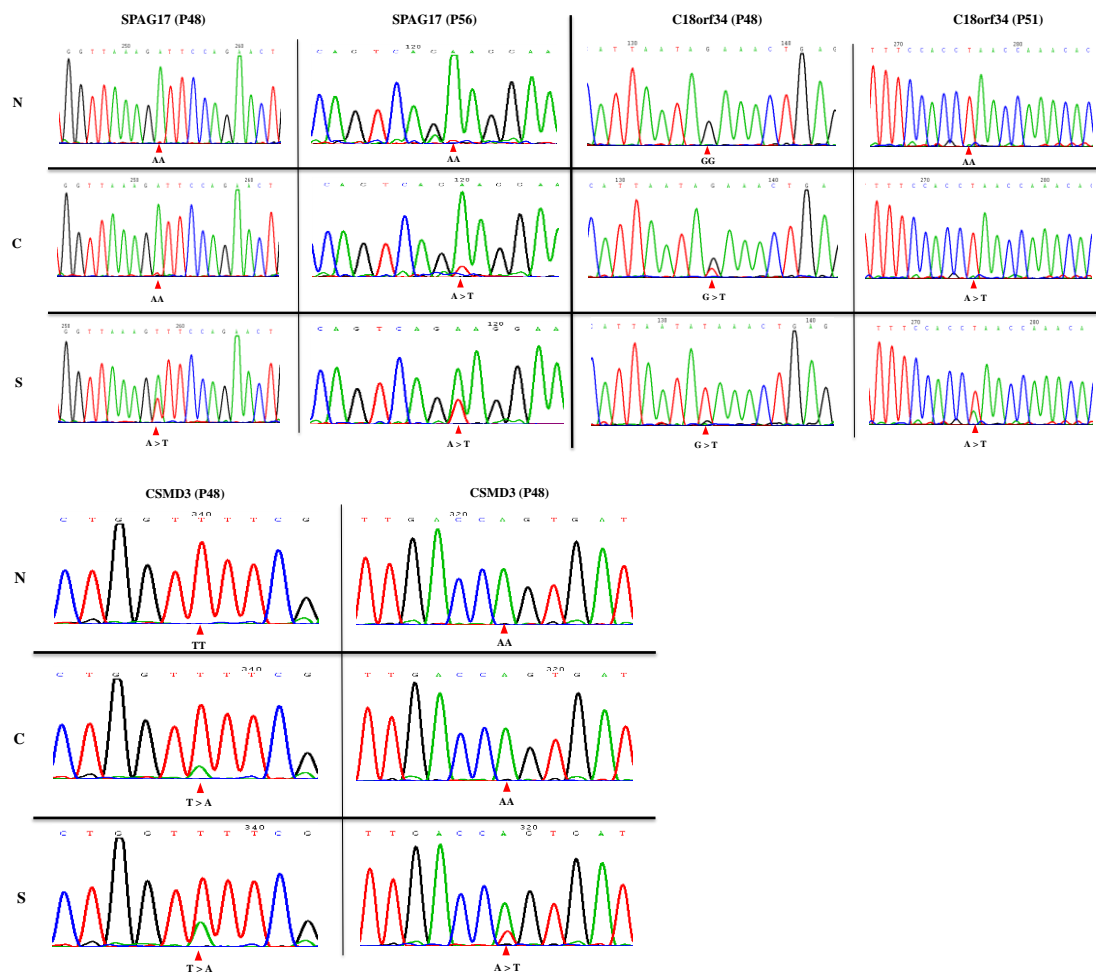

**Supplementary Figure 8. Mutated genes harboring two non-silent mutations confirmed by Sanger sequencing.** The red triangles indicate the mutation sites. N: adjacent liver, C: primary tumor, S: PVTT.

a

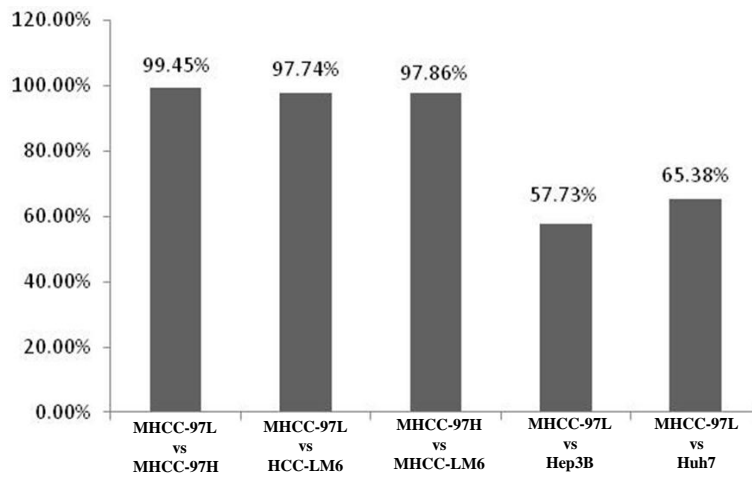

b

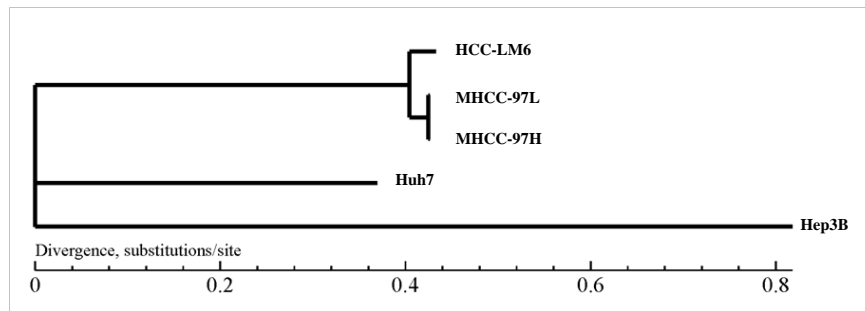

**Supplementary Figure 9. Genotype comparison and analysis of some of the HCC cell lines with an Affymetrix Genome-Wide Human SNP Array 5.0 dataset.**

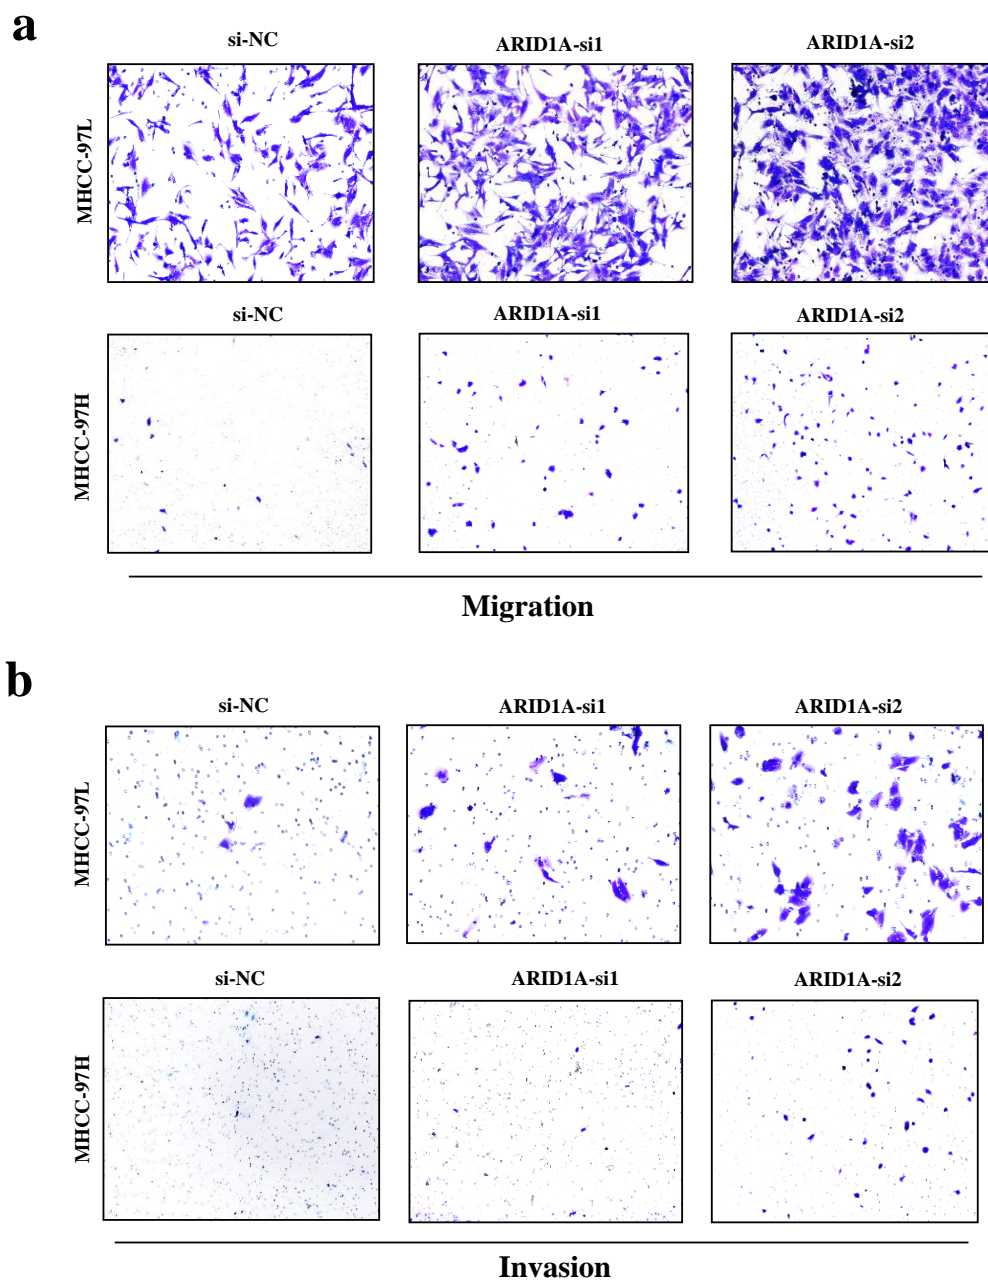

**Supplementary Figure 10. An ARID1A knockdown via RNA interference promoted cell migration (a) and invasion (b) in MHCC-97L and MHCC-97H cells.** The cell migration and invasion were evaluated using Matrigel transwell assays; the permeable cells were stained with crystal violet and counted. The cell migration and invasion assays were repeated three times.

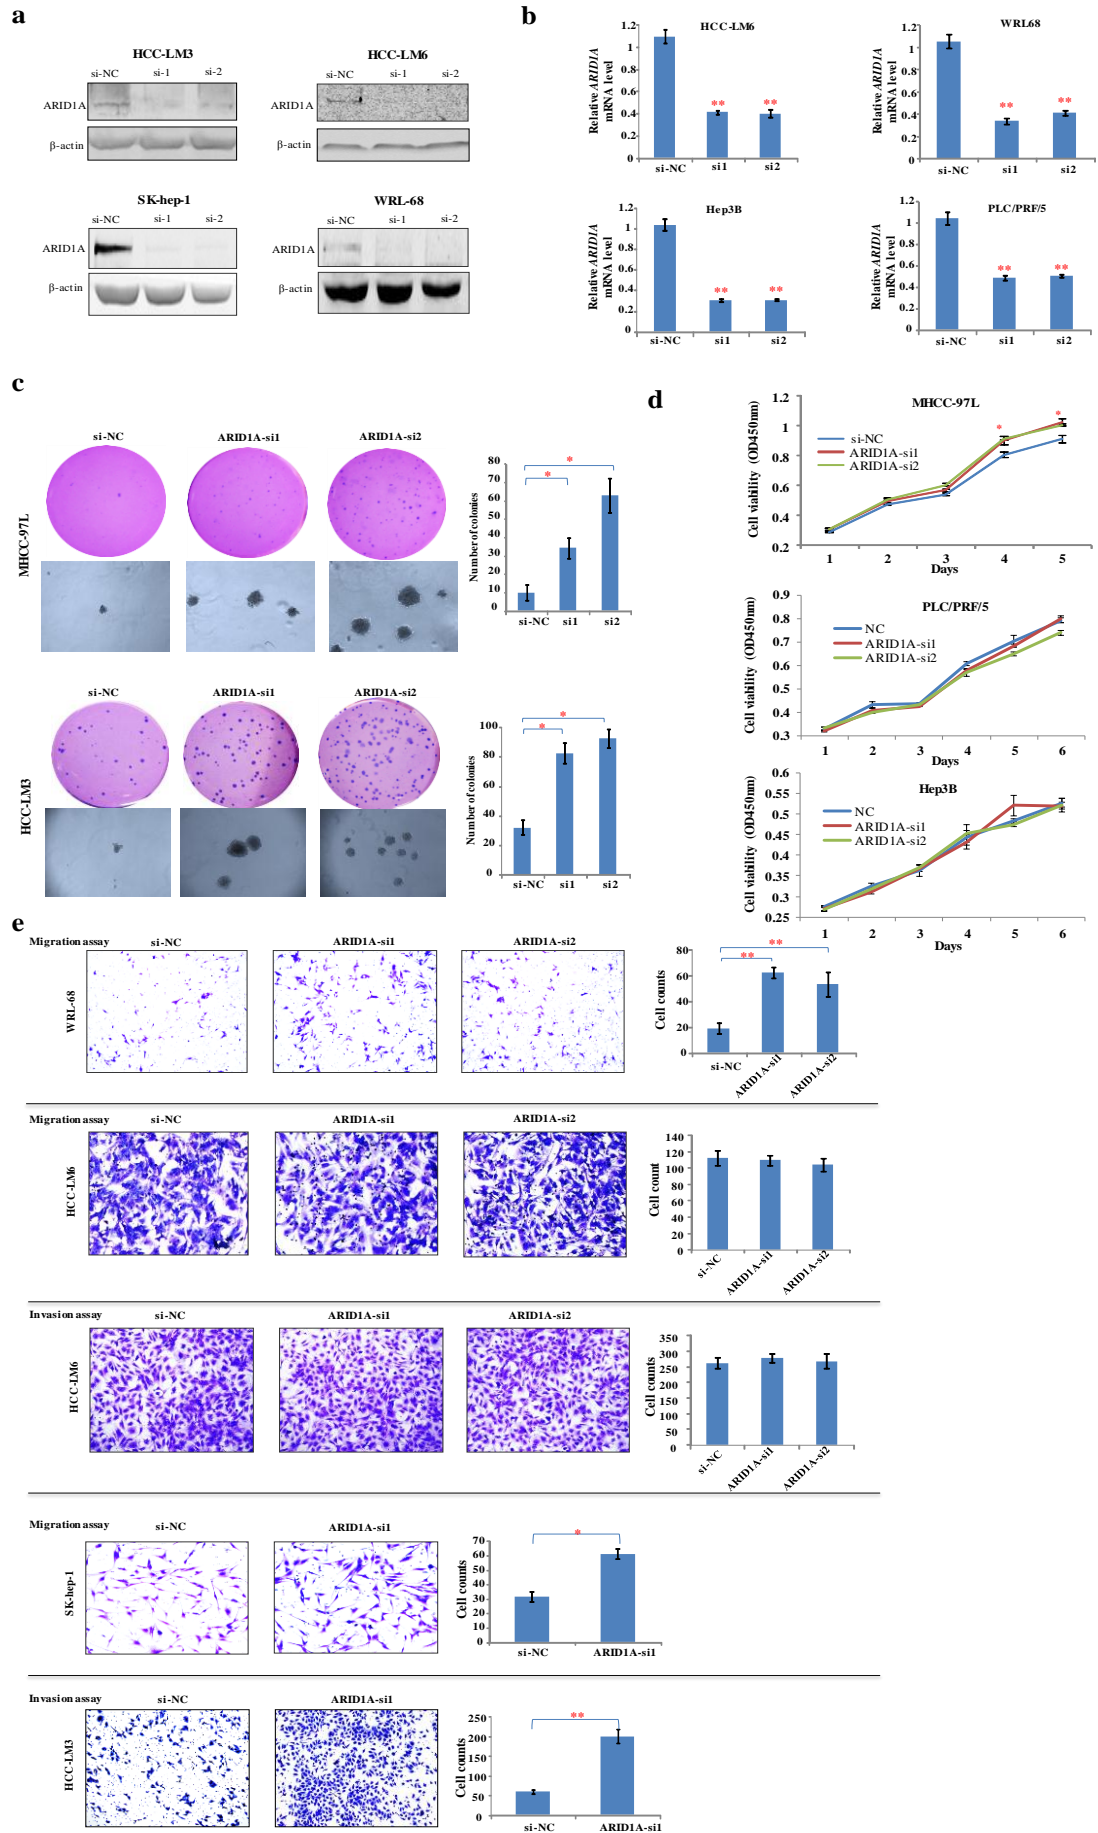

**Supplementary Figure 11. Functional analysis of ARID1A via RNAi knockdown in various HCC cell lines.** (a) The efficacies of two siRNAs (si-1 and si-2) against ARID1A were evaluated with western blotting in HCC-LM3, HCC-LM6, SK-hep-1 and WRL68 cells,  $\beta$ -actin was used as a loading control. (b) The *ARID1A* mRNA expression levels were examined with real-time quantitative PCR to evaluate the efficacies of the two siRNAs (si-1 and si-2) in the HCC-LM6, WRL68, Hep3B and PLC/PRF/5 cell lines. The statistical significance of the *ARID1A* knockdown by siRNAs was calculated with two-tailed t-tests. \*,  $P < 0.05$ ; \*\*,  $P < 0.01$ . (c) The role of ARID1A in cell proliferation was assessed with an anchorage-independent colony formation assay after the ARID1A knockdown in MHCC-97L and HCC-LM3 cells. The colonies grown in soft-agar medium were stained with crystal violet, and photographs (upper) and microphotographs (lower) were taken to count colonies (right). The significance of the difference between colony numbers was calculated with a two-tailed t-test. \*,  $P < 0.05$ ; \*\*,  $P < 0.01$ . (d) The growth curves of MHCC-97L, PLC/PRF/5 and Hep3B cells after the ARID1A knockdown were assessed using cell counting kit-8 (CCK-8). (e) Cell migration and invasion were evaluated with Matrigel transwell assays following ARID1A knockdown via RNA interference in various cell lines. HCC-LM6 cells with the *ARID1A* mutations were used as a negative control. The permeable cells were stained with crystal violet and

counted. The cell migration and invasion assays were repeated three times, and the results were statistically analyzed with a two-tailed t-test. \*

$P < 0.05$ ; \*\*  $P < 0.01$ .

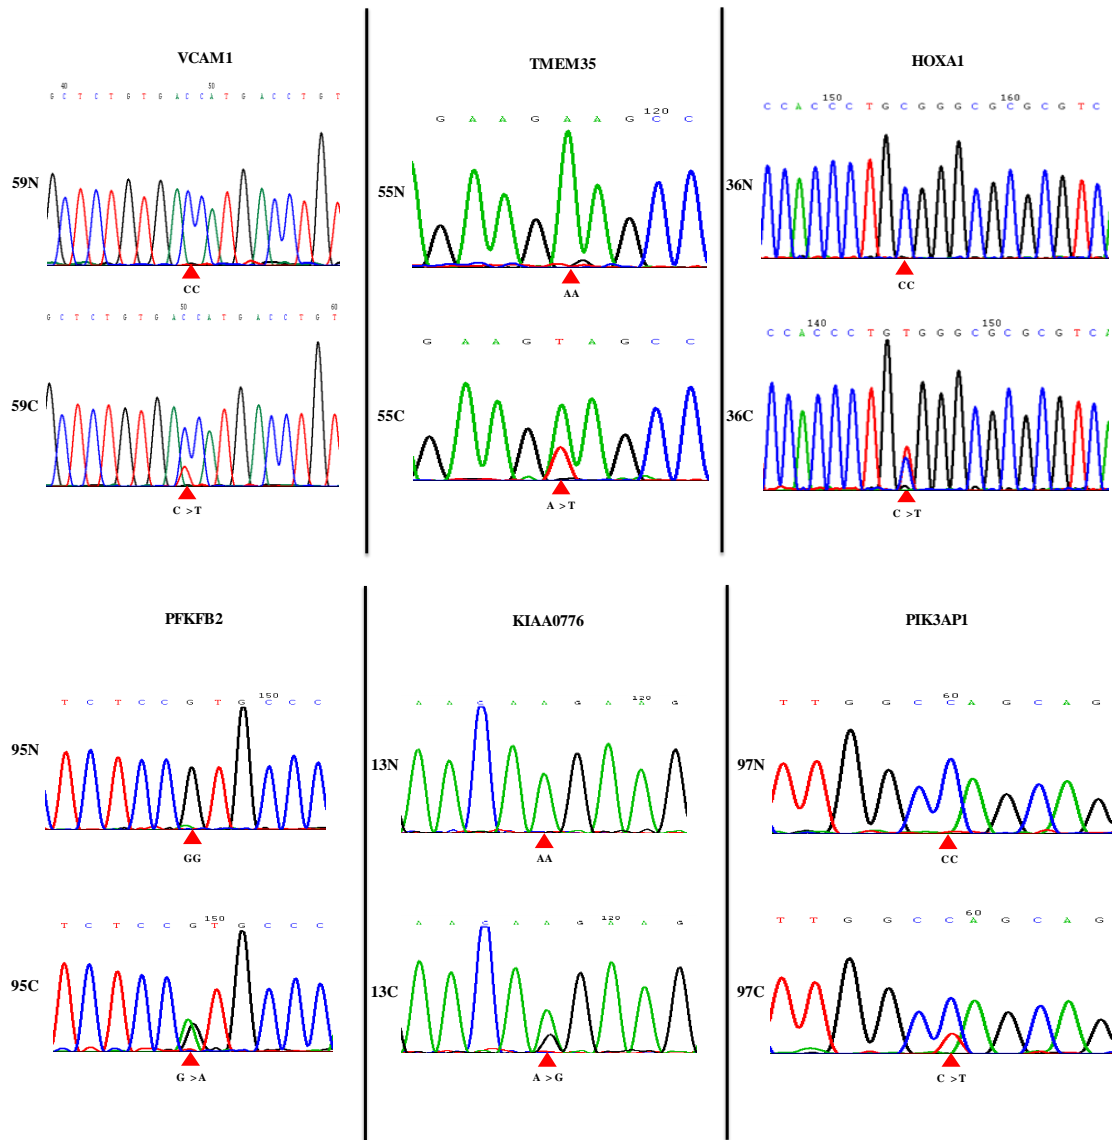

**Supplementary Figure 12. The mutated genes were further examined via Sanger sequencing in additional HCC samples.**

**a**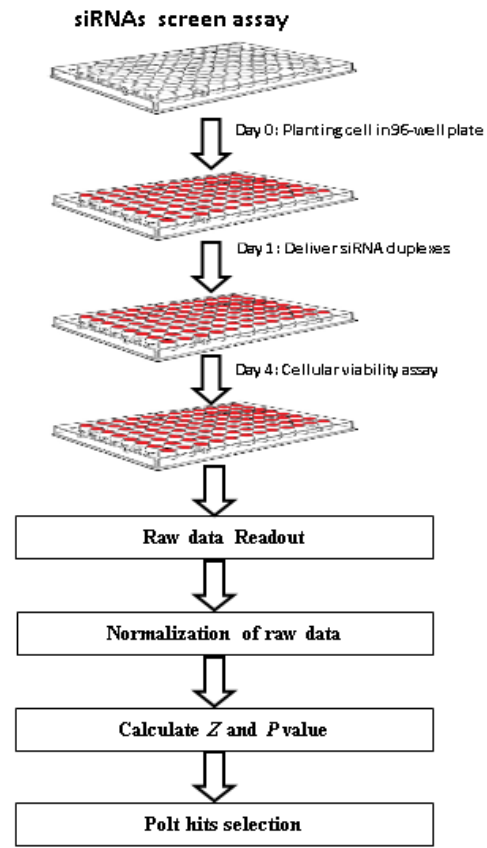**b**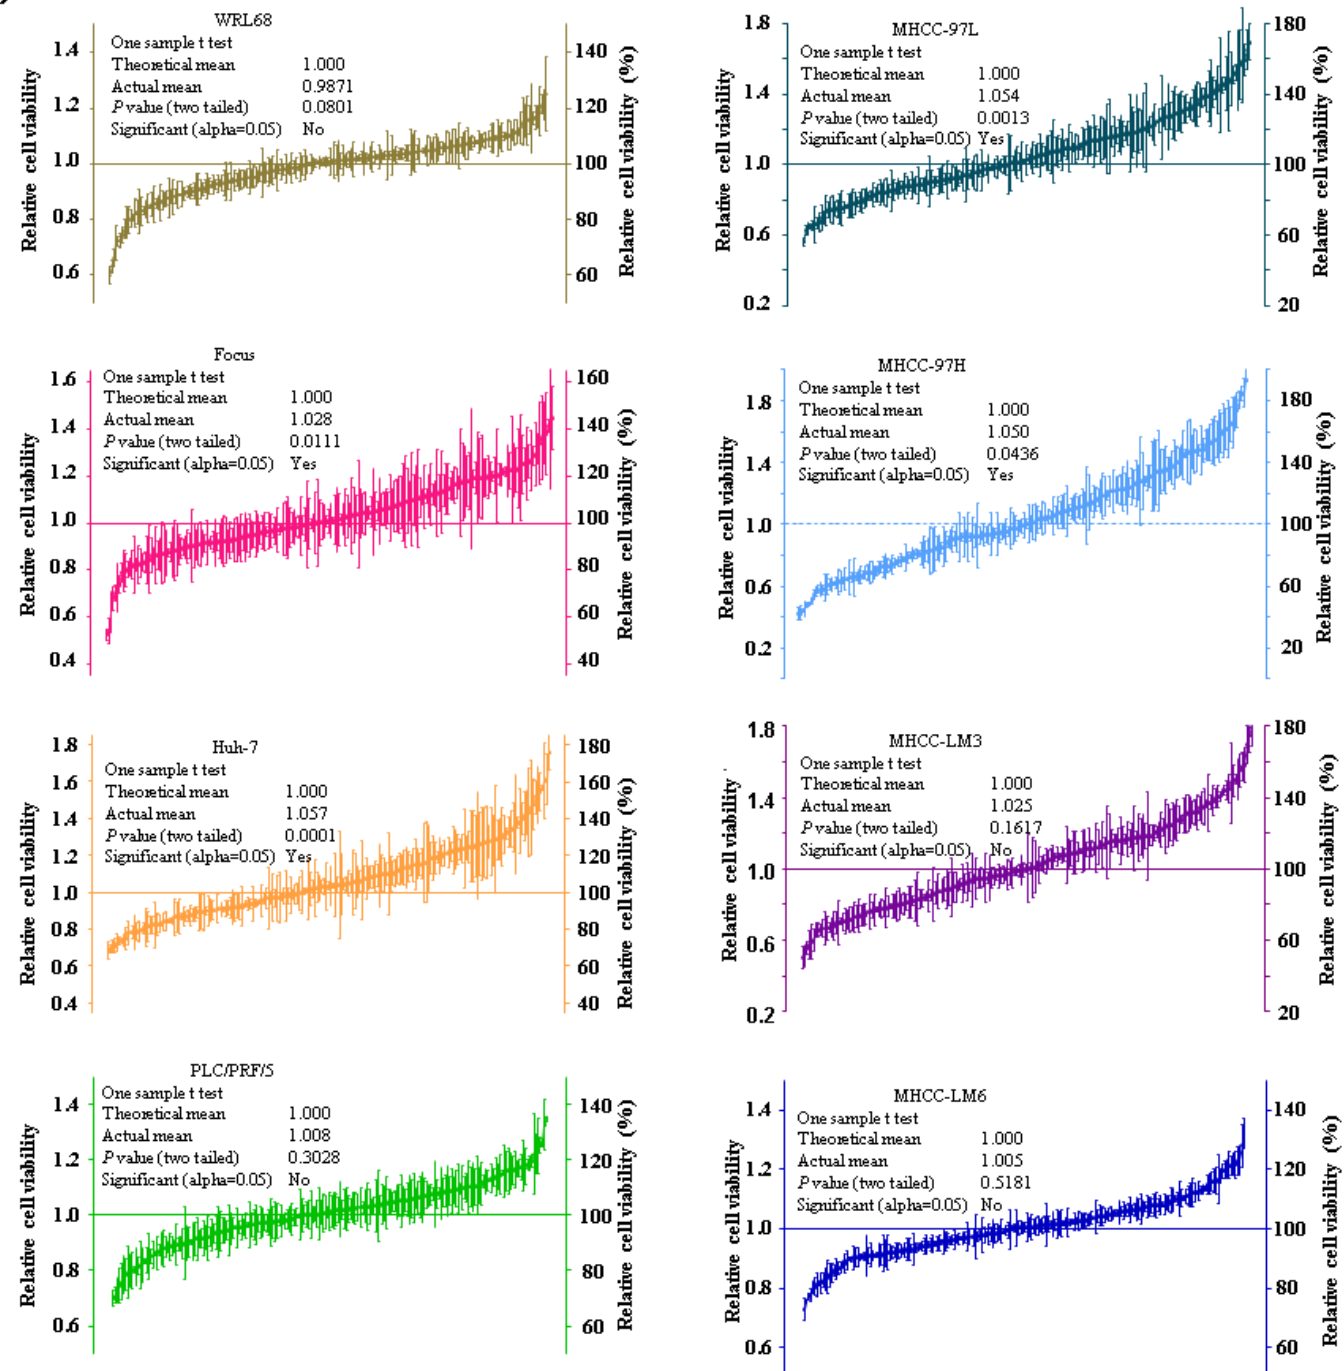**c**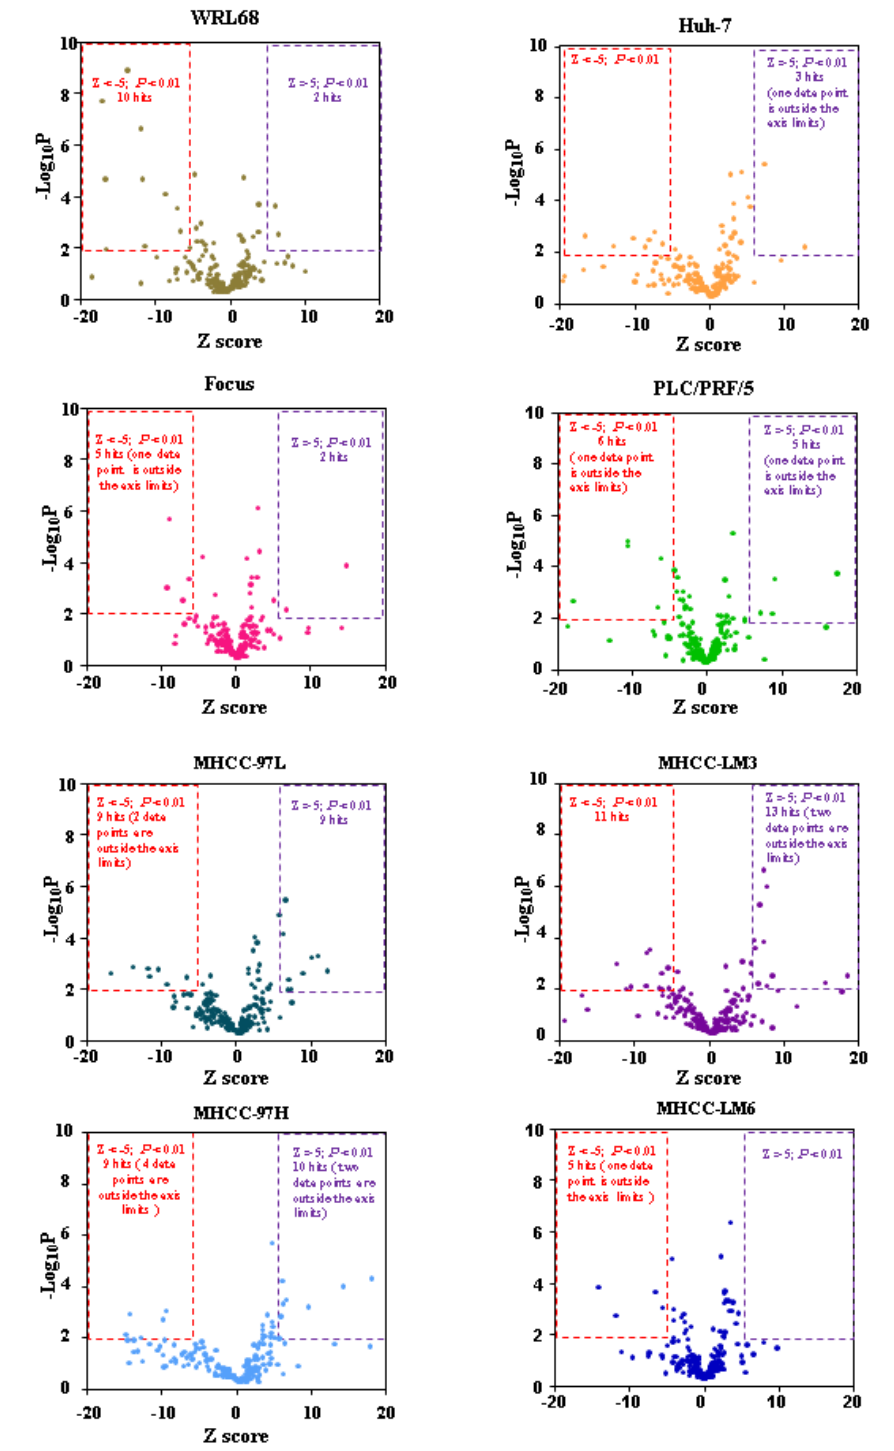



**Supplementary Figure 13. Screen of knockdowns by RNA interference of the mutated genes in eight HCC cell lines.** (a) A flowchart of the cell viability assay screen. The cells were seeded in 96-well culture plates for 24 hours of culture, and the siRNAs were delivered to the adherent cells. After 72 hours, the cell viability was assayed with the Cell Counting Kit-8. The raw absorbance value readouts were normalized, and *Z* scores and *P* values were calculated to evaluate the siRNA effects. (b) The output profile created from the normalized readout data from the RNAi screen. Overall, the knockdown of the majority of the genes had no significant effect on cell viability in 4 of the eight HCC cell lines (one-sample t-test; WRL68: *P* = 0.0801; PLC/PRF/5: *P* = 0.3028; MHCC-LM3: *P* = 0.1617; MHCC-LM6, *P* = 0.5181); In contrast, the loss of function of these genes may have influenced the cell viability of the other four HCC lines (one-sample t-test; Focus, *P* = 0.0111; Huh-7, *P* = 0.0001; MHCC-97L, *P* = 0.0013; MHCC-97H, *P* = 0.0436). (c) The *Z* score was calculated to measure the generated phenotype. In addition, the *P* value was calculated, using one-tailed t-test to assess statistical significance of the difference. Hits in each cell line were determined to promote or inhibit cell viability using the cutoffs of,  $Z < -5, p < 0.01$  and  $Z > 5, p < 0.01$ , respectively.

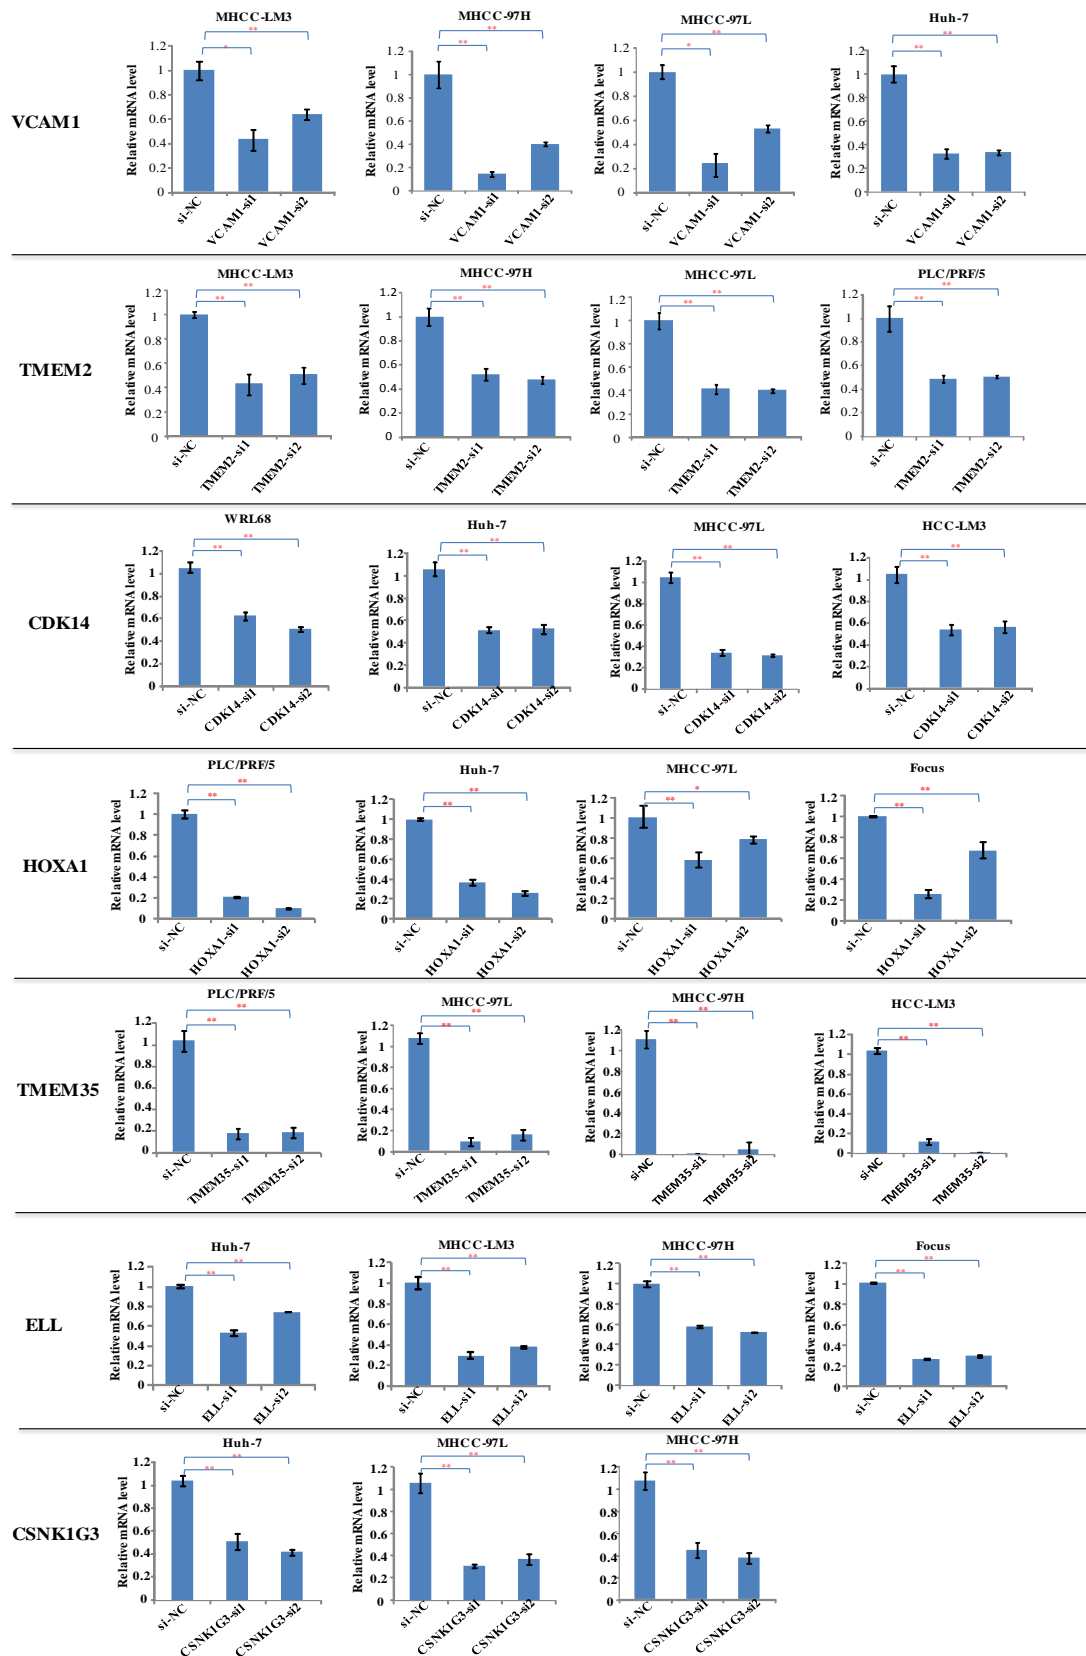

**Supplementary Figure 14. The efficacies of RNA interference against VCAM1, TMEM2, CDK14, HOXA1, TMEM35, ELL and CSNK1G3**

**in the HCC cells were evaluated with real-time quantitative PCR.** The statistical significance of the gene knockdown results was determined using a two-tailed t-test. \*  $P < 0.05$ ; \*\*  $P < 0.01$ .

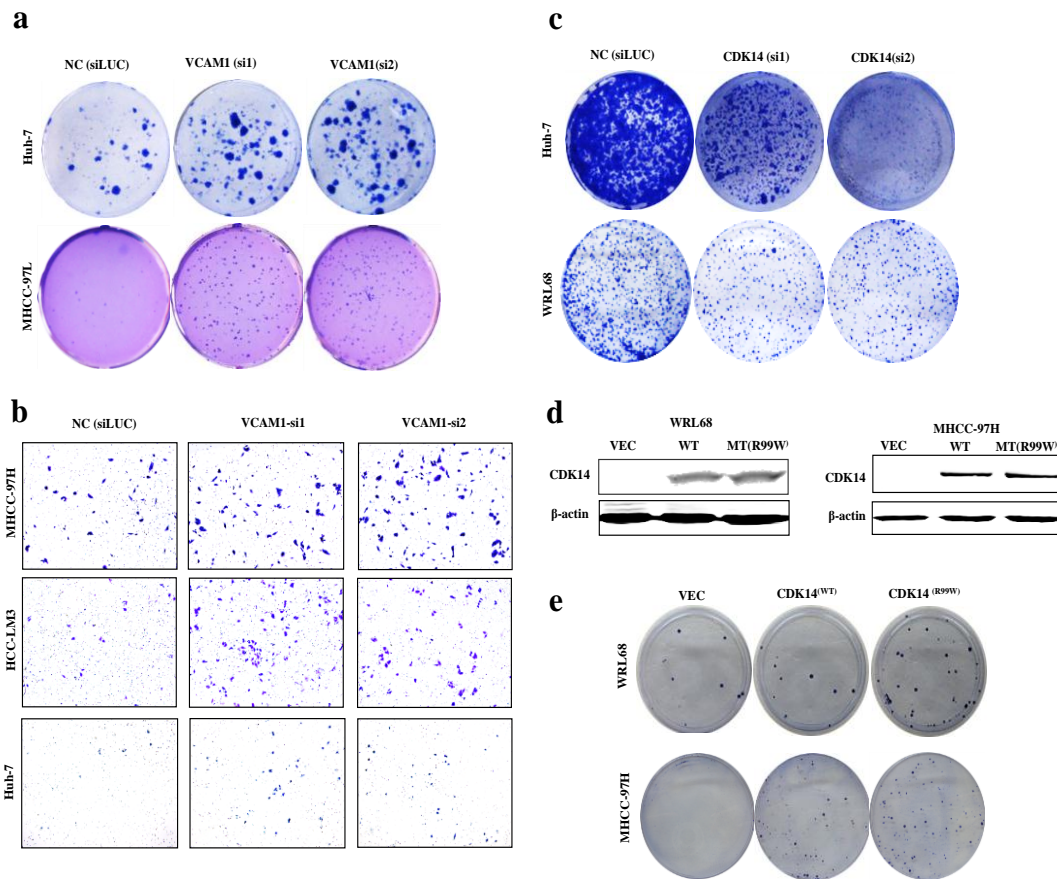

**Supplementary Figure 15. The effects of the mutated genes on cell behaviors determined using cell-based RNA interference (RNAi).** (a) Anchorage-dependent (upper) and -independent (lower) colony formation was assessed via RNAi against VCAM1 in the Huh-7 and MHCC-97L cell lines. (b) The effect of VCAM1 on cell migration was evaluated in MHCC-97H, HCC-LM3 and Huh-7 cells via RNAi. (c) The effect of CDK14 on colony formation was evaluated in Huh-7 and WRL68 cells via RNAi. (d) The expression of the vectors carrying wild type and mutant CDK14 (CDK14<sup>R99W</sup>) in WRL68 and MHCC-97H cells was evaluated with Western blotting (lower);  $\beta$ -actin was used as a loading control. (e) The effect of mutant CDK14<sup>R99W</sup> on colony formation was

evaluated in the WRL68 and MHCC-97H cell lines, with the wild-type CDK14 and the empty vector used as controls.

**a**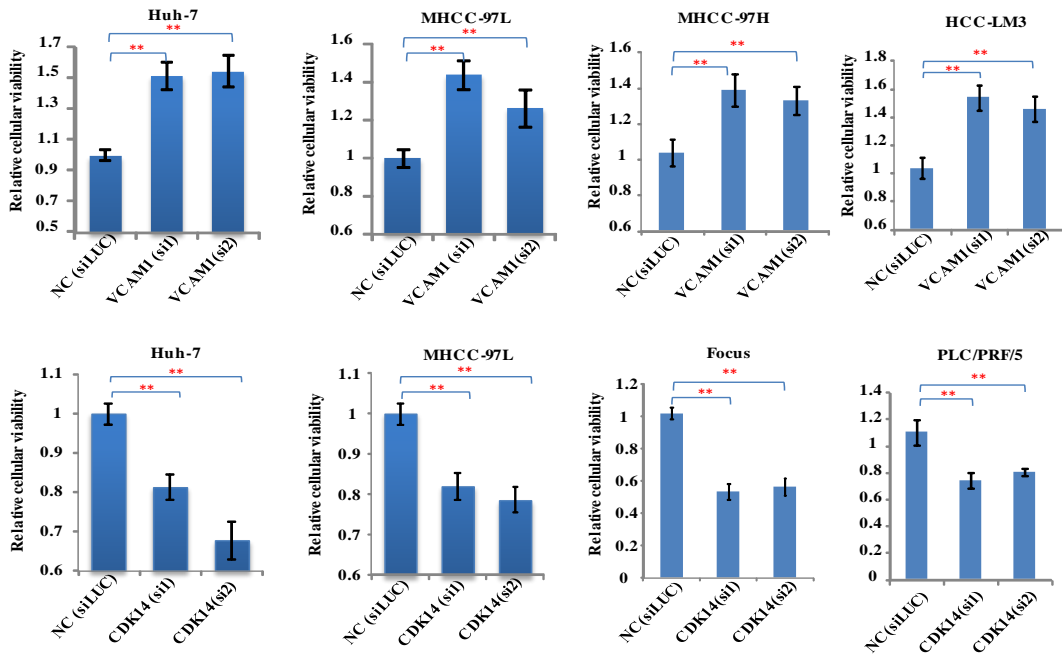**b**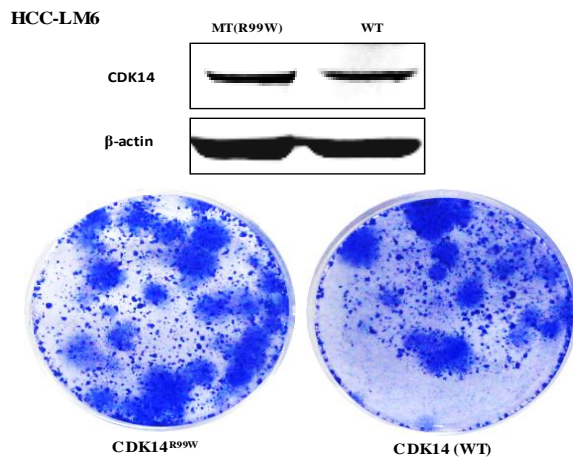

**Supplementary Figure 16. Functional assays of VCAM1 and CDK14 in various HCC cell lines.** (a) The cell viability results in response to the siRNA-mediated loss of gene function of VCAM1 (upper) and CDK14 (lower) are presented. The statistical significance was determined with a two-tailed t-test. \*,  $P < 0.05$ , \*\*,  $P < 0.01$ . (b) The effect of the CDK14<sup>R99W</sup> mutation on the HCC-LM6 cells was evaluated with a colony formation assay (lower), with wild type CDK14 used as a control.

Western blotting (upper) revealed the expression of wild type and mutant CDK14 in the HCC-LM6 cells.

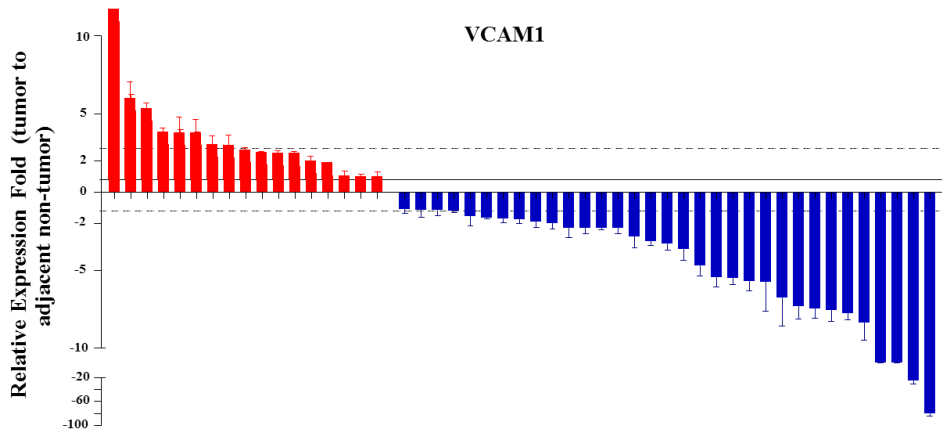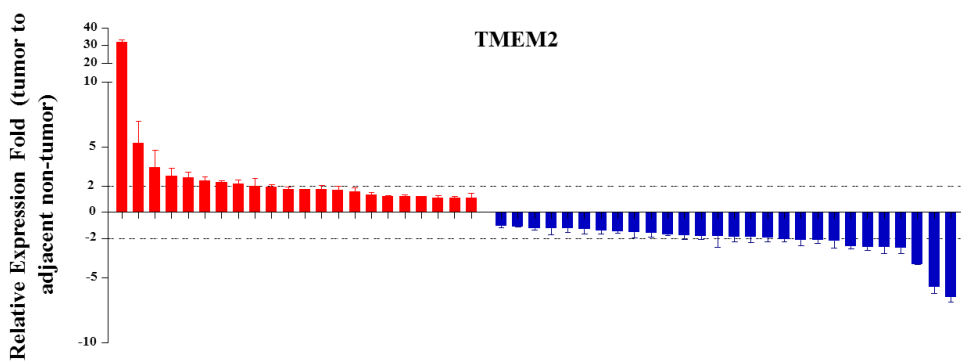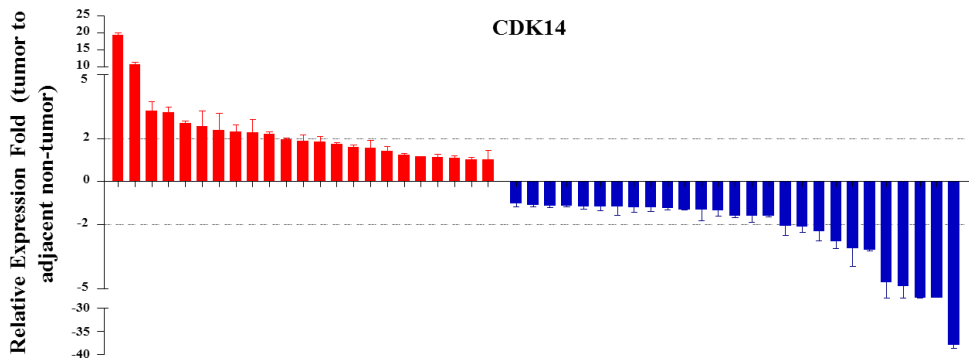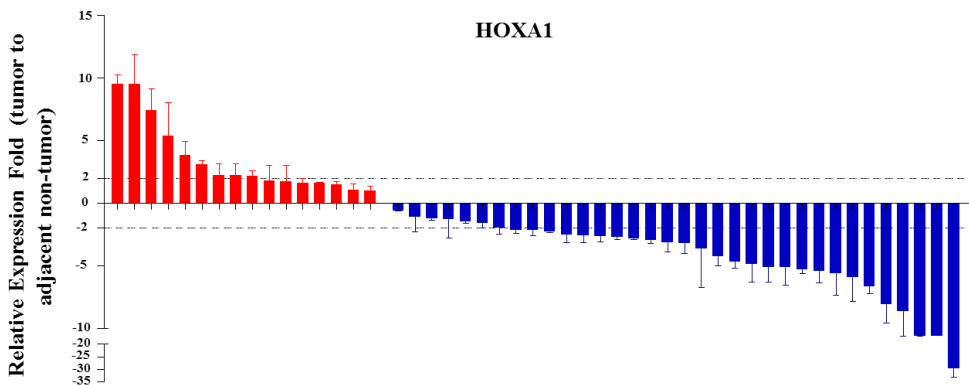



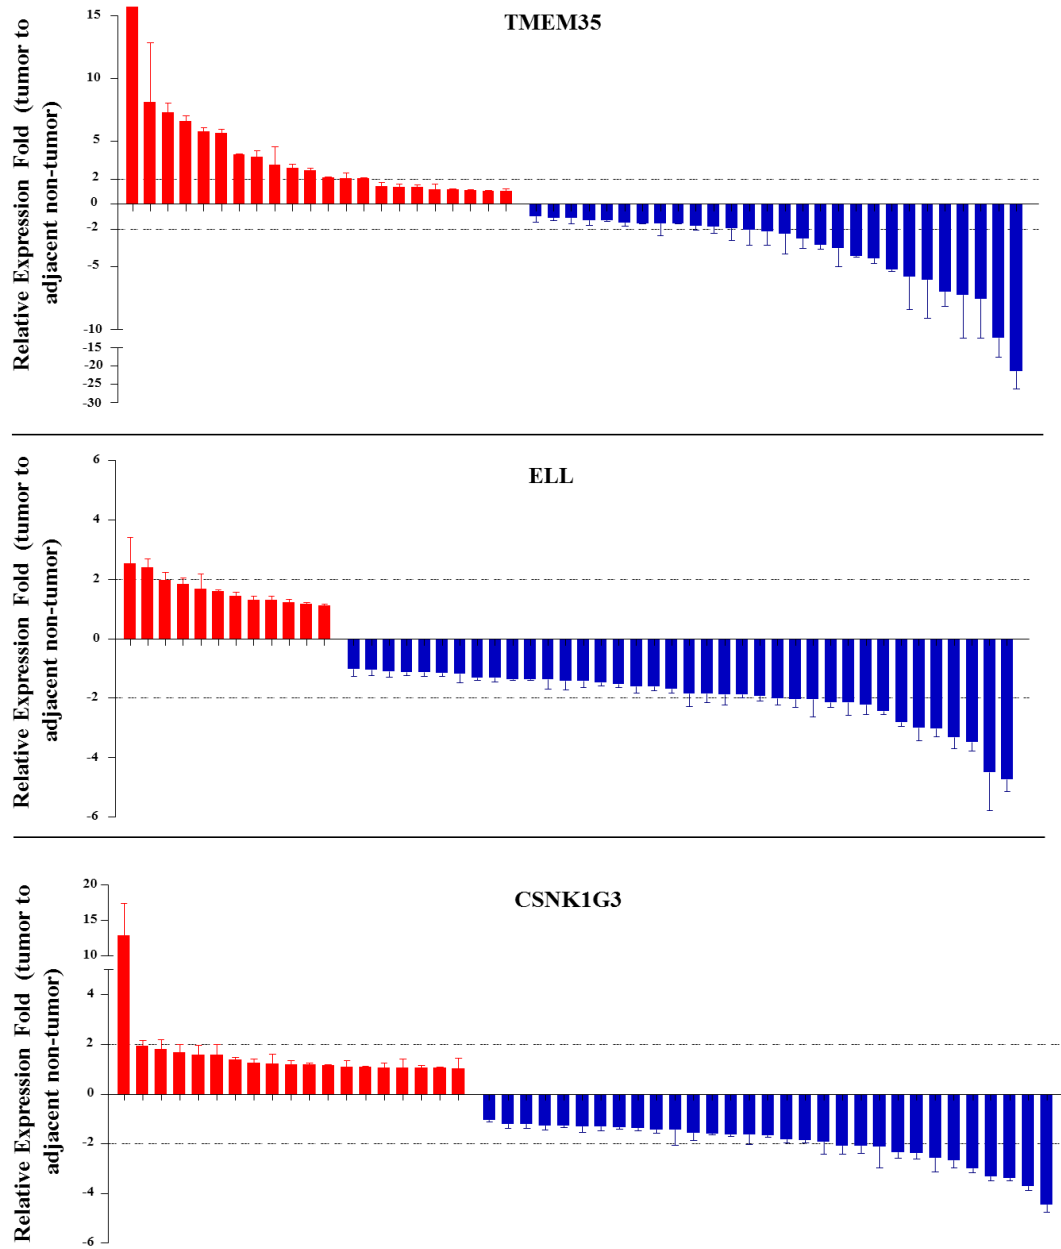

**Supplementary Figure 17. The expression patterns in HCC samples of 7 cancer-associated genes from the RNAi screen.**

**Supplementary Table 1. The clinical and pathological features of the ten HCC patients whose samples were used for exomic sequencing.**

| Patient IDs | Gender | Age | Cell type | Differentiation stages | Size of primary tumors (cm) | HBV/HAV/HCV              | AFP (ng/ml) | PVTT |
|-------------|--------|-----|-----------|------------------------|-----------------------------|--------------------------|-------------|------|
| P47         | Male   | 31  | HCC       | Low                    | > 15                        | HbsAg(+), HAV(-), HCV(-) | 1000        | +    |
| P48         | Male   | 42  | HCC       | Low                    | > 15                        | HbsAg(+), HAV(-), HCV(-) | 317         | +    |
| P50         | Male   | 51  | HCC       | Middle                 | 12 × 10                     | HbsAg(+), HAV(-), HCV(-) | 49610       | +    |
| P51         | Male   | 80  | HCC       | Low to middle          | 4 × 4                       | HbsAg(+), HAV(-), HCV(-) | 654         | +    |
| P52         | Female | 69  | HCC       | Middle                 | 11 × 9                      | HbsAg(-), HAV(-), HCV(-) | 0.887       | +    |
| P53         | Male   | 43  | HCC       | Middle                 | 8 × 6                       | HbsAg(+), HAV(-), HCV(-) | 4609        | +    |
| P54         | Male   | 66  | HCC       | Low to middle          | 3.5 × 3.5                   | HbsAg(+), HAV(-), HCV(-) | 717         | +    |
| P55         | Male   | 54  | HCC       | Low to middle          | 12 × 10                     | HbsAg(-), HAV(-), HCV(-) | 111         | +    |
| P56         | Male   | 50  | HCC       | Low                    | 3 × 4                       | HbsAg(+), HAV(-), HCV(-) | 51.8        | +    |
| P929        | Male   | 54  | HCC       | Low                    | 7 × 8                       | HbsAg(+), HAV(-), HCV(-) | 25410       | +    |

**Supplementary Table 2. The exomic sequencing profiles of ten HCC patients with PVTs.**

| HCC patients ID |       | Solexa          |                                   |                                                        |                                                |                                                |                                                 |                                                 |
|-----------------|-------|-----------------|-----------------------------------|--------------------------------------------------------|------------------------------------------------|------------------------------------------------|-------------------------------------------------|-------------------------------------------------|
|                 |       | Total Target BP | Bases covered on targeted regions | Average depth of sequencing on targeted regions (fold) | Percent of target bp covered at $\geq 1\times$ | Percent of target bp covered at $\geq 4\times$ | Percent of target bp covered at $\geq 10\times$ | Percent of target bp covered at $\geq 20\times$ |
| P47             | P47_N | 34108810        | 32964609                          | 12.77                                                  | 96.60%                                         | 86.30%                                         | 56.10%                                          | 19.90%                                          |
|                 | P47_C | 34108810        | 32944866                          | 13.05                                                  | 96.60%                                         | 85.80%                                         | 55.80%                                          | 20.80%                                          |
| P48             | P48_N | 34108810        | 32819440                          | 14.1                                                   | 96.20%                                         | 84.40%                                         | 58.30%                                          | 25.60%                                          |
|                 | P48_C | 34108810        | 33660337                          | 22.84                                                  | 98.70%                                         | 93.50%                                         | 77.10%                                          | 48.30%                                          |
|                 | P48_S | 34108810        | 33378855                          | 16.9                                                   | 97.90%                                         | 90.20%                                         | 67.40%                                          | 32.90%                                          |
| P50             | P50_N | 34108810        | 33551881                          | 22.97                                                  | 98.40%                                         | 91.50%                                         | 73.00%                                          | 48.30%                                          |
|                 | P50_C | 34108810        | 32813641                          | 19.41                                                  | 96.20%                                         | 84.40%                                         | 63.10%                                          | 39.00%                                          |
|                 | P50_S | 34108810        | 32921996                          | 14.51                                                  | 96.50%                                         | 85.80%                                         | 58.40%                                          | 25.40%                                          |
| P51             | P51_N | 34108810        | 32993262                          | 14.64                                                  | 96.70%                                         | 86.90%                                         | 60.40%                                          | 26.10%                                          |
|                 | P51_C | 34108810        | 32989954                          | 14.59                                                  | 96.70%                                         | 86.60%                                         | 60.10%                                          | 25.90%                                          |
|                 | P51_S | 34108810        | 32837181                          | 14.01                                                  | 96.30%                                         | 83.60%                                         | 55.40%                                          | 23.90%                                          |
| P52             | P52_N | 34108810        | 32898333                          | 12.22                                                  | 96.70%                                         | 85.30%                                         | 54.40%                                          | 17.90%                                          |
|                 | P52_C | 34108810        | 32919005                          | 12.88                                                  | 96.70%                                         | 84.90%                                         | 55.90%                                          | 20.70%                                          |
|                 | P52_S | 34108810        | 33060985                          | 13.62                                                  | 97.10%                                         | 86.50%                                         | 58.80%                                          | 22.90%                                          |

|                        |               |                 |                                   |                                                        |                                                |                                                |                                                 |                                                 |
|------------------------|---------------|-----------------|-----------------------------------|--------------------------------------------------------|------------------------------------------------|------------------------------------------------|-------------------------------------------------|-------------------------------------------------|
| <b>P53</b>             | <b>P53_N</b>  | 34108810        | 32821727                          | 14                                                     | 96.20%                                         | 85.20%                                         | 57.40%                                          | 24.00%                                          |
|                        | <b>P53_C</b>  | 34108810        | 32837822                          | 13.78                                                  | 96.30%                                         | 85.10%                                         | 56.80%                                          | 23.40%                                          |
|                        | <b>P53_S</b>  | 34108810        | 32998745                          | 13.89                                                  | 96.70%                                         | 86.30%                                         | 57.90%                                          | 23.60%                                          |
| <b>P54</b>             | <b>P54_N</b>  | 34108810        | 32868575                          | 22.1                                                   | 96.40%                                         | 83.50%                                         | 62.60%                                          | 41.10%                                          |
|                        | <b>P54_C</b>  | 34108810        | 33166903                          | 12.4                                                   | 97.20%                                         | 86.40%                                         | 56.00%                                          | 18.50%                                          |
|                        | <b>P54_S</b>  | 34108810        | 33151299                          | 28.4                                                   | 97.20%                                         | 88.20%                                         | 71.90%                                          | 50.40%                                          |
| <b>P55</b>             | <b>P55_N</b>  | 34108810        | 32774741                          | 13.48                                                  | 96.10%                                         | 83.70%                                         | 55.50%                                          | 22.90%                                          |
|                        | <b>P55_C</b>  | 34108810        | 33119227                          | 13.01                                                  | 97.10%                                         | 86.20%                                         | 57.30%                                          | 20.70%                                          |
|                        | <b>P55_S</b>  | 34108810        | 32645825                          | 11.73                                                  | 95.70%                                         | 80.10%                                         | 46.90%                                          | 16.90%                                          |
| <b>P56</b>             | <b>P56_N</b>  | 34108810        | 32495095                          | 13.97                                                  | 95.30%                                         | 78.40%                                         | 44.80%                                          | 15.20%                                          |
|                        | <b>P56_C</b>  | 34108810        | 33157949                          | 12.81                                                  | 97.20%                                         | 86.80%                                         | 55.80%                                          | 19.10%                                          |
|                        | <b>P56_S</b>  | 34108810        | 32827036                          | 12.36                                                  | 96.20%                                         | 82.10%                                         | 49.90%                                          | 18.30%                                          |
| <b>P929</b>            | <b>P929_N</b> | 34108810        | 32886528                          | 13                                                     | 96.40%                                         | 87.90%                                         | 60.50%                                          | 20.00%                                          |
|                        | <b>P929_C</b> | 34108810        | 32430656                          | 12.81                                                  | 95.10%                                         | 81.80%                                         | 52.70%                                          | 21.90%                                          |
|                        | <b>P929_S</b> | 34108810        | 32752135                          | 11.99                                                  | 96.00%                                         | 85.50%                                         | 54.10%                                          | 16.80%                                          |
| <b>HCC patients ID</b> |               | <b>SOLID</b>    |                                   |                                                        |                                                |                                                |                                                 |                                                 |
|                        |               | Total Target BP | Bases covered on targeted regions | Average depth of sequencing on targeted regions (fold) | Percent of target bp covered at $\geq 1\times$ | Percent of target bp covered at $\geq 5\times$ | Percent of target bp covered at $\geq 10\times$ | Percent of target bp covered at $\geq 20\times$ |
| <b>P47</b>             | <b>P47_N</b>  | 38754065        | 35758043                          | 48.65                                                  | 92.27%                                         | 86.18%                                         | 79.58%                                          | 67.25%                                          |

|            |              |          |          |       |        |        |        |        |
|------------|--------------|----------|----------|-------|--------|--------|--------|--------|
|            | <b>P47_C</b> | 38754065 | 35592721 | 46.5  | 91.84% | 84.42% | 76.97% | 63.86% |
| <b>P48</b> | <b>P48_N</b> | 38754065 | 36087108 | 46.72 | 93.12% | 87.78% | 81.38% | 68.28% |
|            | <b>P48_C</b> | 38754065 | 36251967 | 52.4  | 93.54% | 89.25% | 83.69% | 71.43% |
|            | <b>P48_S</b> | 38754065 | 35707181 | 54.37 | 92.14% | 86.41% | 80.35% | 68.66% |
| <b>P50</b> | <b>P50_N</b> | —        | —        | —     | —      | —      | —      | —      |
|            | <b>P50_C</b> | 38754065 | 36018601 | 48.28 | 92.94% | 87.04% | 80.41% | 67.57% |
|            | <b>P50_S</b> | 38754065 | 35860025 | 50.71 | 92.53% | 86.04% | 79.21% | 66.79% |
| <b>P51</b> | <b>P51_N</b> | 38754065 | 35878593 | 48.77 | 92.58% | 87.22% | 81.10% | 68.61% |
|            | <b>P51_C</b> | 38754065 | 35951236 | 49.64 | 92.77% | 87.21% | 81.02% | 68.66% |
|            | <b>P51_S</b> | 38754065 | 36179307 | 49.44 | 93.36% | 87.84% | 81.25% | 68.04% |
| <b>P52</b> | <b>P52_N</b> | 38754065 | 36009202 | 42.76 | 92.92% | 87.11% | 79.84% | 64.92% |
|            | <b>P52_C</b> | 38754065 | 35613708 | 47.8  | 91.90% | 85.83% | 79.46% | 67.00% |
|            | <b>P52_S</b> | —        | —        | —     | —      | —      | —      | —      |
| <b>P53</b> | <b>P53_N</b> | —        | —        | —     | —      | —      | —      | —      |
|            | <b>P53_C</b> | 38754065 | 33601921 | 46.15 | 86.71% | 78.38% | 71.90% | 60.64% |
|            | <b>P53_S</b> | 38754065 | 35157077 | 54.24 | 90.72% | 85.13% | 79.74% | 69.13% |
| <b>P54</b> | <b>P54_N</b> | —        | —        | —     | —      | —      | —      | —      |
|            | <b>P54_C</b> | 38754065 | 33527625 | 49.34 | 86.51% | 78.04% | 72.17% | 62.29% |
|            | <b>P54_S</b> | 38754065 | 32242094 | 52.94 | 83.20% | 72.93% | 66.88% | 58.16% |

|                        |               |                                                     |          |                                                   |        |                                                 |        |        |
|------------------------|---------------|-----------------------------------------------------|----------|---------------------------------------------------|--------|-------------------------------------------------|--------|--------|
| <b>P55</b>             | <b>P55_N</b>  | 38754065                                            | 34972901 | 45.25                                             | 90.24% | 82.29%                                          | 75.24% | 63.29% |
|                        | <b>P55_C</b>  | 38754065                                            | 35838924 | 39.35                                             | 92.48% | 85.71%                                          | 77.74% | 61.96% |
|                        | <b>P55_S</b>  | 38754065                                            | 35844234 | 47.46                                             | 92.49% | 86.50%                                          | 79.87% | 66.77% |
| <b>P56</b>             | <b>P56_N</b>  | 38754065                                            | 36042287 | 52.11                                             | 93.00% | 87.91%                                          | 81.96% | 70.24% |
|                        | <b>P56_C</b>  | 38754065                                            | 34772411 | 49.87                                             | 89.62% | 82.48%                                          | 76.56% | 65.82% |
|                        | <b>P56_S</b>  | 38754065                                            | 35749166 | 45.05                                             | 92.25% | 86.24%                                          | 79.55% | 66.15% |
| <b>P929</b>            | <b>P929_N</b> | 38754065                                            | 36156204 | 58.03                                             | 93.30% | 88.71%                                          | 83.59% | 73.37% |
|                        | <b>P929_C</b> | 38754065                                            | 33482268 | 46.19                                             | 86.29% | 77.23%                                          | 70.39% | 59.24% |
|                        | <b>P929_S</b> | 38754065                                            | 36304601 | 50.95                                             | 93.68% | 89.14%                                          | 83.35% | 70.85% |
| <b>HCC patients ID</b> |               | <b>Actual overlap between NimbleGen and Agilent</b> |          |                                                   |        |                                                 |        |        |
|                        |               | Bases covered by Solexa and Solid sequencing reads  |          | Percent of expected coverage in Nimblegen capture |        | Percent of expected coverage in Agilent capture |        |        |
| <b>P47</b>             | <b>P47_N</b>  | 30402144                                            |          | 89.13%                                            |        | 78.45%                                          |        |        |
|                        | <b>P47_C</b>  | 30260463                                            |          | 88.72%                                            |        | 78.08%                                          |        |        |
| <b>P48</b>             | <b>P48_N</b>  | 30555163                                            |          | 89.58%                                            |        | 78.84%                                          |        |        |
|                        | <b>P48_C</b>  | 31490611                                            |          | 92.32%                                            |        | 81.26%                                          |        |        |
|                        | <b>P48_S</b>  | 30767872                                            |          | 90.21%                                            |        | 79.39%                                          |        |        |
| <b>P50</b>             | <b>P50_N</b>  | —                                                   |          | —                                                 |        | —                                               |        |        |
|                        | <b>P50_C</b>  | 30496100                                            |          | 89.41%                                            |        | 78.69%                                          |        |        |
|                        | <b>P50_S</b>  | 30456251                                            |          | 89.29%                                            |        | 78.59%                                          |        |        |

|             |               |          |        |        |
|-------------|---------------|----------|--------|--------|
| <b>P51</b>  | <b>P51_N</b>  | 30535864 | 89.52% | 78.79% |
|             | <b>P51_C</b>  | 30598532 | 89.71% | 78.96% |
|             | <b>P51_S</b>  | 30665757 | 89.91% | 79.13% |
| <b>P52</b>  | <b>P52_N</b>  | 30648007 | 89.85% | 79.08% |
|             | <b>P52_C</b>  | 30311578 | 88.87% | 78.22% |
|             | <b>P52_S</b>  | —        | —      | —      |
| <b>P53</b>  | <b>P53_N</b>  | —        | —      | —      |
|             | <b>P53_C</b>  | 28481446 | 83.50% | 73.49% |
|             | <b>P53_S</b>  | 29922376 | 87.73% | 77.21% |
| <b>P54</b>  | <b>P54_N</b>  | —        | —      | —      |
|             | <b>P54_C</b>  | 28681320 | 84.09% | 74.01% |
|             | <b>P54_S</b>  | 27583931 | 80.87% | 71.18% |
| <b>P55</b>  | <b>P55_N</b>  | 29579378 | 86.72% | 76.33% |
|             | <b>P55_C</b>  | 30629056 | 89.80% | 79.03% |
|             | <b>P55_S</b>  | 30190707 | 88.51% | 77.90% |
| <b>P56</b>  | <b>P56_N</b>  | 30230297 | 88.63% | 78.01% |
|             | <b>P56_C</b>  | 29712403 | 87.11% | 76.67% |
|             | <b>P56_S</b>  | 30269693 | 88.74% | 78.11% |
| <b>P929</b> | <b>P929_N</b> | 30677873 | 89.94% | 79.16% |

|               |          |        |        |
|---------------|----------|--------|--------|
| <b>P929_C</b> | 27990300 | 82.06% | 72.23% |
| <b>P929_S</b> | 30675008 | 89.93% | 79.15% |

**Note: N, matched non-tumorous livers; C, primary tumors; S, PVTs**



**Supplementary Table 6. Summary of the types and prevalence of the somatic mutations found in 10 HCC patients.**

| <b>Sample</b>  | <b>Synonymous</b> | <b>missense</b> | <b>nonsense</b> | <b>Indel</b> | <b>Total</b> | <b>Mutations per Mb DNA</b> | <b>NS/S</b> |
|----------------|-------------------|-----------------|-----------------|--------------|--------------|-----------------------------|-------------|
| <b>P47</b>     | <b>4</b>          | <b>10</b>       | <b>1</b>        | <b>1</b>     | <b>16</b>    | <b>0.454</b>                | <b>2.75</b> |
| <b>P48</b>     | <b>28</b>         | <b>85</b>       | <b>8</b>        | <b>6</b>     | <b>127</b>   | <b>3.607</b>                | <b>3.32</b> |
| <b>P50</b>     | <b>14</b>         | <b>47</b>       | <b>3</b>        | <b>4</b>     | <b>68</b>    | <b>1.932</b>                | <b>3.57</b> |
| <b>P51</b>     | <b>9</b>          | <b>34</b>       | <b>3</b>        | <b>4</b>     | <b>50</b>    | <b>1.420</b>                | <b>4.11</b> |
| <b>P52</b>     | <b>2</b>          | <b>8</b>        | <b>1</b>        | <b>1</b>     | <b>12</b>    | <b>0.341</b>                | <b>4.50</b> |
| <b>P53</b>     | <b>19</b>         | <b>23</b>       | <b>2</b>        | <b>2</b>     | <b>46</b>    | <b>1.307</b>                | <b>1.32</b> |
| <b>P54</b>     | <b>5</b>          | <b>7</b>        | <b>0</b>        | <b>1</b>     | <b>13</b>    | <b>0.369</b>                | <b>1.40</b> |
| <b>P55</b>     | <b>8</b>          | <b>34</b>       | <b>1</b>        | <b>2</b>     | <b>45</b>    | <b>1.278</b>                | <b>4.38</b> |
| <b>P56</b>     | <b>17</b>         | <b>38</b>       | <b>4</b>        | <b>2</b>     | <b>61</b>    | <b>1.733</b>                | <b>2.47</b> |
| <b>P929</b>    | <b>6</b>          | <b>21</b>       | <b>1</b>        | <b>2</b>     | <b>30</b>    | <b>0.852</b>                | <b>3.67</b> |
| <b>Average</b> | <b>11.2</b>       | <b>30.7</b>     | <b>2.4</b>      | <b>2.5</b>   | <b>46.8</b>  | <b>1.329</b>                | <b>2.96</b> |

**Supplementary Table 8. The signaling pathways and biological processes of the mutated genes.**

| Category      | Term                                                  | Count | P-Value  | Fold Enrichment |
|---------------|-------------------------------------------------------|-------|----------|-----------------|
| GOTERM_BP_FAT | cell motion                                           | 23    | 1.70E-04 | 2.5             |
| GOTERM_BP_FAT | neuron projection morphogenesis                       | 14    | 3.00E-04 | 3.3             |
| GOTERM_BP_FAT | axonogenesis                                          | 13    | 4.20E-04 | 3.4             |
| GOTERM_BP_FAT | neuron projection development                         | 15    | 5.40E-04 | 3               |
| GOTERM_BP_FAT | cell morphogenesis involved in neuron differentiation | 13    | 8.60E-04 | 3.2             |
| GOTERM_BP_FAT | cell projection morphogenesis                         | 14    | 1.10E-03 | 2.9             |
| GOTERM_BP_FAT | cell part morphogenesis                               | 14    | 1.70E-03 | 2.8             |
| GOTERM_BP_FAT | cellular component morphogenesis                      | 18    | 2.20E-03 | 2.3             |
| GOTERM_BP_FAT | cell projection organization                          | 17    | 2.50E-03 | 2.3             |
| GOTERM_BP_FAT | cell adhesion                                         | 26    | 2.80E-03 | 1.9             |
| GOTERM_BP_FAT | biological adhesion                                   | 26    | 2.80E-03 | 1.9             |
| GOTERM_BP_FAT | cell morphogenesis involved in differentiation        | 13    | 3.20E-03 | 2.7             |
| GOTERM_BP_FAT | cell morphogenesis                                    | 16    | 4.50E-03 | 2.3             |
| GOTERM_BP_FAT | glycoprotein metabolic process                        | 11    | 6.50E-03 | 2.8             |
| GOTERM_BP_FAT | neuron development                                    | 15    | 7.10E-03 | 2.3             |
| GOTERM_BP_FAT | cell-cell adhesion                                    | 13    | 8.30E-03 | 2.4             |
| GOTERM_BP_FAT | neuron differentiation                                | 17    | 1.30E-02 | 2               |
| GOTERM_BP_FAT | glycoprotein biosynthetic process                     | 9     | 1.30E-02 | 2.9             |
| KEGG_PATHWAY  | Adipocytokine signaling pathway                       | 6     | 1.50E-02 | 4.1             |
| GOTERM_BP_FAT | positive regulation of biosynthetic process           | 23    | 1.80E-02 | 1.7             |
| GOTERM_BP_FAT | membrane organization                                 | 15    | 1.80E-02 | 2               |
| GOTERM_BP_FAT | localization of cell                                  | 13    | 1.80E-02 | 2.2             |
| GOTERM_BP_FAT | cell motility                                         | 13    | 1.80E-02 | 2.2             |
| GOTERM_BP_FAT | regulation of dopamine secretion                      | 3     | 1.90E-02 | 13.9            |

|               |                                                                                              |    |          |     |
|---------------|----------------------------------------------------------------------------------------------|----|----------|-----|
| GOTERM_BP_FAT | cell migration                                                                               | 12 | 2.00E-02 | 2.2 |
| GOTERM_BP_FAT | intracellular signaling cascade                                                              | 36 | 2.10E-02 | 1.5 |
| GOTERM_BP_FAT | positive regulation of organelle organization                                                | 6  | 2.30E-02 | 3.7 |
| GOTERM_BP_FAT | regulation of organelle organization                                                         | 10 | 2.70E-02 | 2.3 |
| GOTERM_BP_FAT | positive regulation of cellular biosynthetic process                                         | 22 | 2.90E-02 | 1.6 |
| GOTERM_BP_FAT | forebrain development                                                                        | 8  | 3.00E-02 | 2.7 |
| GOTERM_BP_FAT | synapse organization                                                                         | 5  | 3.10E-02 | 4.2 |
| GOTERM_BP_FAT | positive regulation of transcription from RNA polymerase II promoter                         | 14 | 3.10E-02 | 1.9 |
| KEGG_PATHWAY  | Olfactory transduction                                                                       | 15 | 3.50E-02 | 1.8 |
| GOTERM_BP_FAT | vesicle-mediated transport                                                                   | 19 | 3.50E-02 | 1.7 |
| GOTERM_BP_FAT | regulation of cell growth                                                                    | 9  | 3.70E-02 | 2.4 |
| GOTERM_BP_FAT | positive regulation of nucleobase, nucleoside, nucleotide and nucleic acid metabolic process | 20 | 3.80E-02 | 1.6 |
| GOTERM_BP_FAT | biopolymer glycosylation                                                                     | 7  | 4.00E-02 | 2.8 |
| GOTERM_BP_FAT | protein amino acid glycosylation                                                             | 7  | 4.00E-02 | 2.8 |
| GOTERM_BP_FAT | glycosylation                                                                                | 7  | 4.00E-02 | 2.8 |
| GOTERM_BP_FAT | extracellular structure organization                                                         | 8  | 4.20E-02 | 2.5 |
| GOTERM_BP_FAT | homophilic cell adhesion                                                                     | 7  | 4.40E-02 | 2.7 |
| GOTERM_BP_FAT | regeneration                                                                                 | 5  | 4.60E-02 | 3.7 |
| GOTERM_BP_FAT | regulation of secretion                                                                      | 9  | 4.60E-02 | 2.3 |
| GOTERM_BP_FAT | neurological system process                                                                  | 33 | 4.90E-02 | 1.4 |
| GOTERM_BP_FAT | positive regulation of transcription, DNA-dependent                                          | 16 | 4.90E-02 | 1.7 |
| GOTERM_BP_FAT | positive regulation of nitrogen compound metabolic process                                   | 20 | 5.00E-02 | 1.6 |
| KEGG_PATHWAY  | Fatty acid metabolism                                                                        | 4  | 5.60E-02 | 4.5 |
| KEGG_PATHWAY  | Cell adhesion molecules (CAMs)                                                               | 7  | 6.80E-02 | 2.4 |
| KEGG_PATHWAY  | ABC transporters                                                                             | 4  | 7.00E-02 | 4.1 |
| KEGG_PATHWAY  | Neuroactive ligand-receptor interaction                                                      | 10 | 1.10E-01 | 1.8 |
| KEGG_PATHWAY  | Colorectal cancer                                                                            | 5  | 1.10E-01 | 2.7 |

|              |                                                        |   |          |     |
|--------------|--------------------------------------------------------|---|----------|-----|
| KEGG_PATHWAY | Hedgehog signaling pathway                             | 4 | 1.20E-01 | 3.2 |
| KEGG_PATHWAY | O-Glycan biosynthesis                                  | 3 | 1.40E-01 | 4.5 |
| KEGG_PATHWAY | Tight junction                                         | 6 | 1.70E-01 | 2   |
| KEGG_PATHWAY | Fructose and mannose metabolism                        | 3 | 1.70E-01 | 4   |
| KEGG_PATHWAY | Wnt signaling pathway                                  | 6 | 2.30E-01 | 1.8 |
| KEGG_PATHWAY | Endometrial cancer                                     | 3 | 3.10E-01 | 2.6 |
| KEGG_PATHWAY | Basal cell carcinoma                                   | 3 | 3.40E-01 | 2.5 |
| KEGG_PATHWAY | Insulin signaling pathway                              | 5 | 3.40E-01 | 1.7 |
| KEGG_PATHWAY | Huntington's disease                                   | 6 | 3.60E-01 | 1.5 |
| KEGG_PATHWAY | GnRH signaling pathway                                 | 4 | 3.60E-01 | 1.9 |
| KEGG_PATHWAY | T cell receptor signaling pathway                      | 4 | 4.20E-01 | 1.7 |
| KEGG_PATHWAY | Vascular smooth muscle contraction                     | 4 | 4.40E-01 | 1.6 |
| KEGG_PATHWAY | Focal adhesion                                         | 6 | 4.50E-01 | 1.4 |
| KEGG_PATHWAY | Alzheimer's disease                                    | 5 | 4.80E-01 | 1.4 |
| KEGG_PATHWAY | Arrhythmogenic right ventricular cardiomyopathy (ARVC) | 3 | 5.00E-01 | 1.8 |
| KEGG_PATHWAY | Adherens junction                                      | 3 | 5.00E-01 | 1.8 |
| KEGG_PATHWAY | Fc epsilon RI signaling pathway                        | 3 | 5.10E-01 | 1.7 |
| KEGG_PATHWAY | Axon guidance                                          | 4 | 5.40E-01 | 1.4 |
| KEGG_PATHWAY | ECM-receptor interaction                               | 3 | 5.50E-01 | 1.6 |
| KEGG_PATHWAY | Small cell lung cancer                                 | 3 | 5.50E-01 | 1.6 |
| KEGG_PATHWAY | Hypertrophic cardiomyopathy (HCM)                      | 3 | 5.60E-01 | 1.6 |
| KEGG_PATHWAY | Apoptosis                                              | 3 | 5.70E-01 | 1.6 |
| KEGG_PATHWAY | ErbB signaling pathway                                 | 3 | 5.70E-01 | 1.6 |
| KEGG_PATHWAY | Pathways in cancer                                     | 8 | 5.80E-01 | 1.1 |
| KEGG_PATHWAY | Dilated cardiomyopathy                                 | 3 | 6.00E-01 | 1.5 |
| KEGG_PATHWAY | Fc gamma R-mediated phagocytosis                       | 3 | 6.20E-01 | 1.4 |
| KEGG_PATHWAY | Valine, leucine and isoleucine degradation             | 2 | 6.20E-01 | 2.1 |
| KEGG_PATHWAY | Arginine and proline metabolism                        | 2 | 6.90E-01 | 1.7 |

|              |                                                            |   |          |     |
|--------------|------------------------------------------------------------|---|----------|-----|
| KEGG_PATHWAY | Amyotrophic lateral sclerosis (ALS)                        | 2 | 6.90E-01 | 1.7 |
| KEGG_PATHWAY | Regulation of actin cytoskeleton                           | 5 | 7.00E-01 | 1.1 |
| KEGG_PATHWAY | Non-small cell lung cancer                                 | 2 | 7.00E-01 | 1.7 |
| KEGG_PATHWAY | Glycolysis / Gluconeogenesis                               | 2 | 7.40E-01 | 1.5 |
| KEGG_PATHWAY | Calcium signaling pathway                                  | 4 | 7.50E-01 | 1   |
| KEGG_PATHWAY | Glioma                                                     | 2 | 7.50E-01 | 1.4 |
| KEGG_PATHWAY | Neurotrophin signaling pathway                             | 3 | 7.60E-01 | 1.1 |
| KEGG_PATHWAY | Parkinson's disease                                        | 3 | 7.80E-01 | 1.1 |
| KEGG_PATHWAY | p53 signaling pathway                                      | 2 | 7.80E-01 | 1.3 |
| KEGG_PATHWAY | Epithelial cell signaling in Helicobacter pylori infection | 2 | 7.80E-01 | 1.3 |
| KEGG_PATHWAY | Chemokine signaling pathway                                | 4 | 7.80E-01 | 1   |
| KEGG_PATHWAY | Long-term depression                                       | 2 | 7.80E-01 | 1.3 |
| KEGG_PATHWAY | PPAR signaling pathway                                     | 2 | 7.80E-01 | 1.3 |
| KEGG_PATHWAY | Renal cell carcinoma                                       | 2 | 7.90E-01 | 1.3 |
| KEGG_PATHWAY | Pancreatic cancer                                          | 2 | 8.00E-01 | 1.3 |
| KEGG_PATHWAY | B cell receptor signaling pathway                          | 2 | 8.10E-01 | 1.2 |
| KEGG_PATHWAY | Chronic myeloid leukemia                                   | 2 | 8.10E-01 | 1.2 |
| KEGG_PATHWAY | Cardiac muscle contraction                                 | 2 | 8.20E-01 | 1.2 |
| KEGG_PATHWAY | MAPK signaling pathway                                     | 5 | 8.40E-01 | 0.9 |
| KEGG_PATHWAY | TGF-beta signaling pathway                                 | 2 | 8.60E-01 | 1   |
| KEGG_PATHWAY | Prostate cancer                                            | 2 | 8.60E-01 | 1   |
| KEGG_PATHWAY | Melanogenesis                                              | 2 | 8.90E-01 | 0.9 |
| KEGG_PATHWAY | Toll-like receptor signaling pathway                       | 2 | 8.90E-01 | 0.9 |
| KEGG_PATHWAY | Leukocyte transendothelial migration                       | 2 | 9.30E-01 | 0.8 |
| KEGG_PATHWAY | Cell cycle                                                 | 2 | 9.40E-01 | 0.7 |
| KEGG_PATHWAY | Oxidative phosphorylation                                  | 2 | 9.50E-01 | 0.7 |
| KEGG_PATHWAY | Ubiquitin mediated proteolysis                             | 2 | 9.50E-01 | 0.7 |
| KEGG_PATHWAY | Purine metabolism                                          | 2 | 9.70E-01 | 0.6 |

|              |                                             |   |          |     |
|--------------|---------------------------------------------|---|----------|-----|
| KEGG_PATHWAY | Jak-STAT signaling pathway                  | 2 | 9.70E-01 | 0.6 |
| KEGG_PATHWAY | Endocytosis                                 | 2 | 9.80E-01 | 0.5 |
| KEGG_PATHWAY | Non-homologous end-joining                  | 1 | 1.00E+00 | 3.5 |
| KEGG_PATHWAY | Riboflavin metabolism                       | 1 | 1.00E+00 | 2.8 |
| KEGG_PATHWAY | Thiamine metabolism                         | 1 | 1.00E+00 | 5.7 |
| KEGG_PATHWAY | Gap junction                                | 1 | 1.00E+00 | 0.5 |
| KEGG_PATHWAY | DNA replication                             | 1 | 1.00E+00 | 1.3 |
| KEGG_PATHWAY | Butanoate metabolism                        | 1 | 1.00E+00 | 1.3 |
| KEGG_PATHWAY | Homologous recombination                    | 1 | 1.00E+00 | 1.6 |
| KEGG_PATHWAY | Glutathione metabolism                      | 1 | 1.00E+00 | 0.9 |
| KEGG_PATHWAY | Chondroitin sulfate biosynthesis            | 1 | 1.00E+00 | 2.1 |
| KEGG_PATHWAY | Thyroid cancer                              | 1 | 1.00E+00 | 1.6 |
| KEGG_PATHWAY | Notch signaling pathway                     | 1 | 1.00E+00 | 1   |
| KEGG_PATHWAY | Retinol metabolism                          | 1 | 1.00E+00 | 0.8 |
| KEGG_PATHWAY | Limonene and pinene degradation             | 1 | 1.00E+00 | 3.2 |
| KEGG_PATHWAY | SNARE interactions in vesicular transport   | 1 | 1.00E+00 | 1.2 |
| KEGG_PATHWAY | Drug metabolism                             | 1 | 1.00E+00 | 0.7 |
| KEGG_PATHWAY | Histidine metabolism                        | 1 | 1.00E+00 | 1.6 |
| KEGG_PATHWAY | Ether lipid metabolism                      | 1 | 1.00E+00 | 1.3 |
| KEGG_PATHWAY | Alanine, aspartate and glutamate metabolism | 1 | 1.00E+00 | 1.5 |
| KEGG_PATHWAY | Amino sugar and nucleotide sugar metabolism | 1 | 1.00E+00 | 1   |
| KEGG_PATHWAY | Lysosome                                    | 1 | 1.00E+00 | 0.4 |
| KEGG_PATHWAY | Glycerolipid metabolism                     | 1 | 1.00E+00 | 1   |
| KEGG_PATHWAY | Hematopoietic cell lineage                  | 1 | 1.00E+00 | 0.5 |
| KEGG_PATHWAY | RNA degradation                             | 1 | 1.00E+00 | 0.8 |
| KEGG_PATHWAY | Systemic lupus erythematosus                | 1 | 1.00E+00 | 0.5 |
| KEGG_PATHWAY | Cytokine-cytokine receptor interaction      | 1 | 1.00E+00 | 0.2 |
| KEGG_PATHWAY | Arachidonic acid metabolism                 | 1 | 1.00E+00 | 0.8 |

|              |                                              |   |          |      |
|--------------|----------------------------------------------|---|----------|------|
| KEGG_PATHWAY | Tyrosine metabolism                          | 1 | 1.00E+00 | 1    |
| KEGG_PATHWAY | Natural killer cell mediated cytotoxicity    | 1 | 1.00E+00 | 0.3  |
| KEGG_PATHWAY | RIG-I-like receptor signaling pathway        | 1 | 1.00E+00 | 0.6  |
| KEGG_PATHWAY | Progesterone-mediated oocyte maturation      | 1 | 1.00E+00 | 0.5  |
| KEGG_PATHWAY | Ascorbate and aldarate metabolism            | 1 | 1.00E+00 | 2.7  |
| KEGG_PATHWAY | NOD-like receptor signaling pathway          | 1 | 1.00E+00 | 0.7  |
| KEGG_PATHWAY | Tryptophan metabolism                        | 1 | 1.00E+00 | 1.1  |
| KEGG_PATHWAY | Glycerophospholipid metabolism               | 1 | 1.00E+00 | 0.7  |
| KEGG_PATHWAY | Metabolism of xenobiotics by cytochrome P450 | 1 | 1.00E+00 | 0.8  |
| KEGG_PATHWAY | Type II diabetes mellitus                    | 1 | 1.00E+00 | 1    |
| KEGG_PATHWAY | Complement and coagulation cascades          | 1 | 1.00E+00 | 0.7  |
| KEGG_PATHWAY | Taste transduction                           | 1 | 1.00E+00 | 0.9  |
| KEGG_PATHWAY | VEGF signaling pathway                       | 1 | 1.00E+00 | 0.6  |
| KEGG_PATHWAY | Bladder cancer                               | 1 | 1.00E+00 | 1.1  |
| KEGG_PATHWAY | O-Mannosyl glycan biosynthesis               | 1 | 1.00E+00 | 15.1 |
| KEGG_PATHWAY | Acute myeloid leukemia                       | 1 | 1.00E+00 | 0.8  |
| KEGG_PATHWAY | Nucleotide excision repair                   | 1 | 1.00E+00 | 1    |
| KEGG_PATHWAY | Basal transcription factors                  | 1 | 1.00E+00 | 1.3  |
| KEGG_PATHWAY | Viral myocarditis                            | 1 | 1.00E+00 | 0.6  |
| KEGG_PATHWAY | Dorso-ventral axis formation                 | 1 | 1.00E+00 | 1.8  |
| KEGG_PATHWAY | Melanoma                                     | 1 | 1.00E+00 | 0.6  |
| KEGG_PATHWAY | Aldosterone-regulated sodium reabsorption    | 1 | 1.00E+00 | 1.1  |
| KEGG_PATHWAY | Prion diseases                               | 1 | 1.00E+00 | 1.3  |
| KEGG_PATHWAY | Primary immunodeficiency                     | 1 | 1.00E+00 | 1.3  |
| KEGG_PATHWAY | Propanoate metabolism                        | 1 | 1.00E+00 | 1.4  |
| KEGG_PATHWAY | alpha-Linolenic acid metabolism              | 1 | 1.00E+00 | 2.5  |
| KEGG_PATHWAY | Spliceosome                                  | 1 | 1.00E+00 | 0.4  |
| KEGG_PATHWAY | Oocyte meiosis                               | 1 | 1.00E+00 | 0.4  |

|              |                                        |   |          |      |
|--------------|----------------------------------------|---|----------|------|
| KEGG_PATHWAY | Linoleic acid metabolism               | 1 | 1.00E+00 | 1.6  |
| KEGG_PATHWAY | Lysine degradation                     | 1 | 1.00E+00 | 1    |
| KEGG_PATHWAY | D-Glutamine and D-glutamate metabolism | 1 | 1.00E+00 | 11.4 |
| KEGG_PATHWAY | Glycosphingolipid biosynthesis         | 1 | 1.00E+00 | 1.8  |
| KEGG_PATHWAY | beta-Alanine metabolism                | 1 | 1.00E+00 | 2.1  |
| KEGG_PATHWAY | Nitrogen metabolism                    | 1 | 1.00E+00 | 2    |
| KEGG_PATHWAY | Pyruvate metabolism                    | 1 | 1.00E+00 | 1.1  |
| KEGG_PATHWAY | Glycosphingolipid biosynthesis         | 1 | 1.00E+00 | 3.2  |

---



**Supplementary Table 9. The signaling pathways and biological processes separated by HCC patient.**

| Symbol   | Gene ID | Pathways and biological processes | Database     | Number of mutations<br>(Patient ID) |
|----------|---------|-----------------------------------|--------------|-------------------------------------|
| BMP8B    | 656     | Hedgehog signaling pathway        | KEGG_PATHWAY | 1 (P51)                             |
| CSNK1G3  | 1456    | Hedgehog signaling pathway        | KEGG_PATHWAY | 1 (P50)                             |
| LRP2     | 4036    | Hedgehog signaling pathway        | KEGG_PATHWAY | 1 (P55)                             |
| WNT2     | 7472    | Hedgehog signaling pathway        | KEGG_PATHWAY | 1 (P55)                             |
| FZD1     | 8321    | Wnt signaling pathway             | KEGG_PATHWAY | 1 (P48)                             |
| MAPK8    | 5599    | Wnt signaling pathway             | KEGG_PATHWAY | 1 (P48)                             |
| PPP2R1B  | 5519    | Wnt signaling pathway             | KEGG_PATHWAY | 1 (P929)                            |
| TP53     | 7157    | Wnt signaling pathway             | KEGG_PATHWAY | 1 (P56)                             |
| VANGL1   | 81839   | Wnt signaling pathway             | KEGG_PATHWAY | 1 (P54)                             |
| WNT2     | 7472    | Wnt signaling pathway             | KEGG_PATHWAY | 1 (P55)                             |
| MAPK8    | 5599    | ErbB signaling pathway            | KEGG_PATHWAY | 1 (P48)                             |
| PAK6     | 56924   | ErbB signaling pathway            | KEGG_PATHWAY | 1 (P56)                             |
| SOS1     | 6654    | ErbB signaling pathway            | KEGG_PATHWAY | 1 (P48)                             |
| APAF1    | 317     | Apoptosis                         | KEGG_PATHWAY | 1 (P56)                             |
| PRKAR1B  | 5575    | Apoptosis                         | KEGG_PATHWAY | 1 (P48)                             |
| TP53     | 7157    | Apoptosis                         | KEGG_PATHWAY | 1 (P56)                             |
| CACNA2D1 | 781     | MAPK signaling pathway            | KEGG_PATHWAY | 1 (P51)                             |
| MAPK8    | 5599    | MAPK signaling pathway            | KEGG_PATHWAY | 1 (P48)                             |
| PLA2G6   | 8398    | MAPK signaling pathway            | KEGG_PATHWAY | 1 (P50)                             |
| SOS1     | 6654    | MAPK signaling pathway            | KEGG_PATHWAY | 1 (P48)                             |
| TP53     | 7157    | MAPK signaling pathway            | KEGG_PATHWAY | 1 (P56)                             |
| BMP8B    | 656     | TGF-beta signaling pathway        | KEGG_PATHWAY | 1 (P51)                             |
| PPP2R1B  | 5519    | TGF-beta signaling pathway        | KEGG_PATHWAY | 1 (P929)                            |
| CCNH     | 902     | Cell cycle                        | KEGG_PATHWAY | 1 (P48)                             |

|         |        |                                 |               |          |
|---------|--------|---------------------------------|---------------|----------|
| TP53    | 7157   | Cell cycle                      | KEGG_PATHWAY  | 1 (P56)  |
| PLA2G6  | 8398   | VEGF signaling pathway          | KEGG_PATHWAY  | 1 (P50)  |
| PSENEN  | 55851  | Notch signaling pathway         | KEGG_PATHWAY  | 1 (P56)  |
| LIFR    | 3977   | Jak-STAT signaling pathway      | KEGG_PATHWAY  | 1 (P55)  |
| SOS1    | 6654   | Jak-STAT signaling pathway      | KEGG_PATHWAY  | 1 (P48)  |
| ITGA6   | 3655   | Cell adhesion molecules (CAMs)  | KEGG_PATHWAY  | 1 (P51)  |
| NRXN2   | 9379   | Cell adhesion molecules (CAMs)  | KEGG_PATHWAY  | 1 (P52)  |
| NFASC   | 23114  | Cell adhesion molecules (CAMs)  | KEGG_PATHWAY  | 1 (P52)  |
| NRCAM   | 4897   | Cell adhesion molecules (CAMs)  | KEGG_PATHWAY  | 1 (P56)  |
| PVRL1   | 5818   | Cell adhesion molecules (CAMs)  | KEGG_PATHWAY  | 1 (P47)  |
| SIGLEC1 | 6614   | Cell adhesion molecules (CAMs)  | KEGG_PATHWAY  | 1 (P56)  |
| VCAM1   | 7412   | Cell adhesion molecules (CAMs)  | KEGG_PATHWAY  | 1 (P929) |
| CTCF    | 10664  | chromatin binding               | GOTERM_MF_FAT | 1 (P929) |
| ATRX    | 546    | chromatin binding               | GOTERM_MF_FAT | 1 (P50)  |
| CHAF1B  | 8208   | chromatin binding               | GOTERM_MF_FAT | 1 (P48)  |
| MPO     | 4353   | chromatin binding               | GOTERM_MF_FAT | 1 (P55)  |
| PBRM1   | 55193  | chromatin binding               | GOTERM_MF_FAT | 1 (P48)  |
| RUNX2   | 860    | chromatin binding               | GOTERM_MF_FAT | 1 (P52)  |
| TP53    | 7157   | chromatin binding               | GOTERM_MF_FAT | 1 (P56)  |
| AGAP6   | 414189 | small GTPase regulator activity | GOTERM_MF_FAT | 1 (P50)  |
| FGD6    | 55785  | small GTPase regulator activity | GOTERM_MF_FAT | 1 (P51)  |
| IQGAP1  | 8826   | small GTPase regulator activity | GOTERM_MF_FAT | 1 (P56)  |
| ARHGEF5 | 7984   | small GTPase regulator activity | GOTERM_MF_FAT | 1 (P50)  |
| CIT     | 11113  | small GTPase regulator activity | GOTERM_MF_FAT | 1 (P55)  |
| DOCK2   | 1794   | small GTPase regulator activity | GOTERM_MF_FAT | 1 (P56)  |
| PLEKHG2 | 64857  | small GTPase regulator activity | GOTERM_MF_FAT | 1 (P48)  |
| SOS1    | 6654   | small GTPase regulator activity | GOTERM_MF_FAT | 1 (P48)  |
| TTN     | 7273   | small GTPase regulator activity | GOTERM_MF_FAT | 1 (P48)  |

|          |        |                                  |               |          |
|----------|--------|----------------------------------|---------------|----------|
| ARID1A   | 8289   | transcription regulator activity | GOTERM_MF_FAT | 2 (P56)  |
| CTCF     | 10664  | transcription regulator activity | GOTERM_MF_FAT | 1 (P929) |
| ELK3     | 2004   | transcription regulator activity | GOTERM_MF_FAT | 1 (P929) |
| GLIS1    | 148979 | transcription regulator activity | GOTERM_MF_FAT | 1 (P50)  |
| KIAA2018 | 205717 | transcription regulator activity | GOTERM_MF_FAT | 1 (P48)  |
| LHX9     | 56956  | transcription regulator activity | GOTERM_MF_FAT | 1 (P55)  |
| POU1F1   | 5449   | transcription regulator activity | GOTERM_MF_FAT | 1 (P50)  |
| POU3F3   | 5455   | transcription regulator activity | GOTERM_MF_FAT | 1 (P48)  |
| TBX18    | 9096   | transcription regulator activity | GOTERM_MF_FAT | 1 (P50)  |
| TBX19    | 9095   | transcription regulator activity | GOTERM_MF_FAT | 1 (P48)  |
| TAF1L    | 138474 | transcription regulator activity | GOTERM_MF_FAT | 1 (P48)  |
| BRWD1    | 54014  | transcription regulator activity | GOTERM_MF_FAT | 1 (P47)  |
| DCC      | 1630   | transcription regulator activity | GOTERM_MF_FAT | 1 (P47)  |
| ELL      | 8178   | transcription regulator activity | GOTERM_MF_FAT | 1 (P48)  |
| GTF3C1   | 2975   | transcription regulator activity | GOTERM_MF_FAT | 1 (P54)  |
| GCM1     | 8521   | transcription regulator activity | GOTERM_MF_FAT | 1 (P48)  |
| HOXA1    | 3198   | transcription regulator activity | GOTERM_MF_FAT | 1 (P52)  |
| KEAP1    | 9817   | transcription regulator activity | GOTERM_MF_FAT | 1 (P51)  |
| MTF1     | 4520   | transcription regulator activity | GOTERM_MF_FAT | 1 (P56)  |
| MYT1     | 4661   | transcription regulator activity | GOTERM_MF_FAT | 1 (P56)  |
| NR2E1    | 7101   | transcription regulator activity | GOTERM_MF_FAT | 1 (P48)  |
| PPARGC1A | 10891  | transcription regulator activity | GOTERM_MF_FAT | 1 (P53)  |
| PLAGL2   | 5326   | transcription regulator activity | GOTERM_MF_FAT | 1 (P48)  |
| PFDN5    | 5204   | transcription regulator activity | GOTERM_MF_FAT | 1 (P53)  |
| RUNX2    | 860    | transcription regulator activity | GOTERM_MF_FAT | 1 (P52)  |
| TSHZ1    | 10194  | transcription regulator activity | GOTERM_MF_FAT | 1 (P48)  |
| TRIM32   | 22954  | transcription regulator activity | GOTERM_MF_FAT | 1 (P51)  |
| TP53     | 7157   | transcription regulator activity | GOTERM_MF_FAT | 1 (P56)  |

|          |        |                                  |               |             |
|----------|--------|----------------------------------|---------------|-------------|
| ZBTB7B   | 51043  | transcription regulator activity | GOTERM_MF_FAT | 1 (P56)     |
| ZSCAN16  | 80345  | transcription regulator activity | GOTERM_MF_FAT | 1 (P50)     |
| ZFP36L1  | 677    | transcription regulator activity | GOTERM_MF_FAT | 1 (P929)    |
| ZNF394   | 84124  | transcription regulator activity | GOTERM_MF_FAT | 1 (P50)     |
| ARID1A   | 8289   | DNA binding                      | GOTERM_MF_FAT | 2 (P56)     |
| ARID2    | 196528 | DNA binding                      | GOTERM_MF_FAT | 2 (P48;P51) |
| AKNA     | 80709  | DNA binding                      | GOTERM_MF_FAT | 1 (P48)     |
| BRIP1    | 83990  | DNA binding                      | GOTERM_MF_FAT | 1 (P56)     |
| CTCF     | 10664  | DNA binding                      | GOTERM_MF_FAT | 1 (P929)    |
| ELK3     | 2004   | DNA binding                      | GOTERM_MF_FAT | 1 (P929)    |
| GLIS1    | 148979 | DNA binding                      | GOTERM_MF_FAT | 1 (P50)     |
| HMGXB4   | 10042  | DNA binding                      | GOTERM_MF_FAT | 1 (P55)     |
| KIAA2018 | 205717 | DNA binding                      | GOTERM_MF_FAT | 1 (P48)     |
| LHX9     | 56956  | DNA binding                      | GOTERM_MF_FAT | 1 (P55)     |
| POU1F1   | 5449   | DNA binding                      | GOTERM_MF_FAT | 1 (P50)     |
| POU3F3   | 5455   | DNA binding                      | GOTERM_MF_FAT | 1 (P48)     |
| RAD50    | 10111  | DNA binding                      | GOTERM_MF_FAT | 1 (P48)     |
| SMARCAL1 | 50485  | DNA binding                      | GOTERM_MF_FAT | 1 (P929)    |
| TBX18    | 9096   | DNA binding                      | GOTERM_MF_FAT | 1 (P50)     |
| TBX19    | 9095   | DNA binding                      | GOTERM_MF_FAT | 1 (P48)     |
| TAF1L    | 138474 | DNA binding                      | GOTERM_MF_FAT | 1 (P48)     |
| ATRX     | 546    | DNA binding                      | GOTERM_MF_FAT | 1 (P50)     |
| GTF3C1   | 2975   | DNA binding                      | GOTERM_MF_FAT | 1 (P54)     |
| GCM1     | 8521   | DNA binding                      | GOTERM_MF_FAT | 1 (P48)     |
| HOXA1    | 3198   | DNA binding                      | GOTERM_MF_FAT | 1 (P52)     |
| MTF1     | 4520   | DNA binding                      | GOTERM_MF_FAT | 1 (P56)     |
| MYT1     | 4661   | DNA binding                      | GOTERM_MF_FAT | 1 (P56)     |
| MLL3     | 58508  | DNA binding                      | GOTERM_MF_FAT | 1 (P56)     |

|          |        |                                 |               |          |
|----------|--------|---------------------------------|---------------|----------|
| NR2E1    | 7101   | DNA binding                     | GOTERM_MF_FAT | 1 (P48)  |
| PPARGC1A | 10891  | DNA binding                     | GOTERM_MF_FAT | 1 (P53)  |
| PLAGL2   | 5326   | DNA binding                     | GOTERM_MF_FAT | 1 (P48)  |
| POGZ     | 23126  | DNA binding                     | GOTERM_MF_FAT | 1 (P56)  |
| PBRM1    | 55193  | DNA binding                     | GOTERM_MF_FAT | 1 (P48)  |
| RAG1     | 5896   | DNA binding                     | GOTERM_MF_FAT | 1 (P48)  |
| RUNX2    | 860    | DNA binding                     | GOTERM_MF_FAT | 1 (P52)  |
| SOS1     | 6654   | DNA binding                     | GOTERM_MF_FAT | 1 (P48)  |
| TSHZ1    | 10194  | DNA binding                     | GOTERM_MF_FAT | 1 (P48)  |
| TSN      | 7247   | DNA binding                     | GOTERM_MF_FAT | 1 (P51)  |
| TP53     | 7157   | DNA binding                     | GOTERM_MF_FAT | 1 (P56)  |
| ZBTB7B   | 51043  | DNA binding                     | GOTERM_MF_FAT | 1 (P56)  |
| ZSCAN16  | 80345  | DNA binding                     | GOTERM_MF_FAT | 1 (P50)  |
| ZNF28    | 7576   | DNA binding                     | GOTERM_MF_FAT | 1 (P53)  |
| ZNF280B  | 140883 | DNA binding                     | GOTERM_MF_FAT | 1 (P51)  |
| ZNF32    | 7580   | DNA binding                     | GOTERM_MF_FAT | 1 (P48)  |
| ZNF324   | 25799  | DNA binding                     | GOTERM_MF_FAT | 1 (P47)  |
| ZFP36L1  | 677    | DNA binding                     | GOTERM_MF_FAT | 1 (P929) |
| ZNF394   | 84124  | DNA binding                     | GOTERM_MF_FAT | 1 (P50)  |
| ZNF671   | 79891  | DNA binding                     | GOTERM_MF_FAT | 1 (P53)  |
| ZNF84    | 7637   | DNA binding                     | GOTERM_MF_FAT | 1 (P48)  |
| ZMAT2    | 153527 | DNA binding                     | GOTERM_MF_FAT | 1 (P56)  |
| ACSL1    | 2180   | Fatty acid metabolism           | KEGG_PATHWAY  | 1 (P50)  |
| ADH4     | 127    | Fatty acid metabolism           | KEGG_PATHWAY  | 1 (P54)  |
| ALDH2    | 217    | Fatty acid metabolism           | KEGG_PATHWAY  | 1 (P929) |
| CPT1A    | 1374   | Fatty acid metabolism           | KEGG_PATHWAY  | 1 (P54)  |
| ACSL1    | 2180   | Adipocytokine signaling pathway | KEGG_PATHWAY  | 1 (P50)  |
| CAMKK2   | 10645  | Adipocytokine signaling pathway | KEGG_PATHWAY  | 1 (P51)  |

|          |        |                                 |               |          |
|----------|--------|---------------------------------|---------------|----------|
| CPT1A    | 1374   | Adipocytokine signaling pathway | KEGG_PATHWAY  | 1 (P54)  |
| MAPK8    | 5599   | Adipocytokine signaling pathway | KEGG_PATHWAY  | 1 (P48)  |
| PPARGC1A | 10891  | Adipocytokine signaling pathway | KEGG_PATHWAY  | 1 (P53)  |
| PRKCQ    | 5588   | Adipocytokine signaling pathway | KEGG_PATHWAY  | 1 (P55)  |
| GUCA1C   | 9626   | Olfactory transduction          | KEGG_PATHWAY  | 1 (P51)  |
| OR1S1    | 219959 | Olfactory transduction          | KEGG_PATHWAY  | 1 (P51)  |
| OR10H5   | 284433 | Olfactory transduction          | KEGG_PATHWAY  | 1 (P48)  |
| OR11H6   | 122748 | Olfactory transduction          | KEGG_PATHWAY  | 1 (P51)  |
| OR2C1    | 4993   | Olfactory transduction          | KEGG_PATHWAY  | 1 (P56)  |
| OR2G3    | 81469  | Olfactory transduction          | KEGG_PATHWAY  | 1 (P50)  |
| OR2M5    | 127059 | Olfactory transduction          | KEGG_PATHWAY  | 1 (P929) |
| OR2T4    | 127074 | Olfactory transduction          | KEGG_PATHWAY  | 1 (P53)  |
| OR5A2    | 219981 | Olfactory transduction          | KEGG_PATHWAY  | 1 (P50)  |
| OR5B12   | 390191 | Olfactory transduction          | KEGG_PATHWAY  | 1 (P53)  |
| OR5D13   | 390142 | Olfactory transduction          | KEGG_PATHWAY  | 1 (P55)  |
| OR5F1    | 338674 | Olfactory transduction          | KEGG_PATHWAY  | 1 (P48)  |
| OR52N2   | 390077 | Olfactory transduction          | KEGG_PATHWAY  | 1 (P56)  |
| OR9G4    | 283189 | Olfactory transduction          | KEGG_PATHWAY  | 1 (P53)  |
| OR9Q1    | 219956 | Olfactory transduction          | KEGG_PATHWAY  | 1 (P55)  |
| AKAP3    | 10566  | cell motion                     | GOTERM_BP_FAT | 1 (P53)  |
| CD97     | 976    | cell motion                     | GOTERM_BP_FAT | 1 (P53)  |
| POU3F3   | 5455   | cell motion                     | GOTERM_BP_FAT | 1 (P48)  |
| ANK3     | 288    | cell motion                     | GOTERM_BP_FAT | 1 (P53)  |
| ASTN1    | 460    | cell motion                     | GOTERM_BP_FAT | 1 (P48)  |
| CATSPER1 | 117144 | cell motion                     | GOTERM_BP_FAT | 1 (P48)  |
| CCKAR    | 886    | cell motion                     | GOTERM_BP_FAT | 1 (P50)  |
| DOCK2    | 1794   | cell motion                     | GOTERM_BP_FAT | 1 (P56)  |
| DCC      | 1630   | cell motion                     | GOTERM_BP_FAT | 1 (P47)  |

|        |       |                     |               |             |
|--------|-------|---------------------|---------------|-------------|
| EDN3   | 1908  | cell motion         | GOTERM_BP_FAT | 1 (P51)     |
| ELMO1  | 9844  | cell motion         | GOTERM_BP_FAT | 2 (P48;P50) |
| GDNF   | 2668  | cell motion         | GOTERM_BP_FAT | 1 (P929)    |
| HOXA1  | 3198  | cell motion         | GOTERM_BP_FAT | 1 (P52)     |
| ITGA6  | 3655  | cell motion         | GOTERM_BP_FAT | 1 (P51)     |
| MAPK8  | 5599  | cell motion         | GOTERM_BP_FAT | 1 (P48)     |
| NFASC  | 23114 | cell motion         | GOTERM_BP_FAT | 1 (P52)     |
| NRCAM  | 4897  | cell motion         | GOTERM_BP_FAT | 1 (P56)     |
| NR2E1  | 7101  | cell motion         | GOTERM_BP_FAT | 1 (P48)     |
| PVRL1  | 5818  | cell motion         | GOTERM_BP_FAT | 1 (P47)     |
| SEMA3A | 10371 | cell motion         | GOTERM_BP_FAT | 1 (P53)     |
| SPOCK1 | 6695  | cell motion         | GOTERM_BP_FAT | 1 (P56)     |
| VCAM1  | 7412  | cell motion         | GOTERM_BP_FAT | 1 (P929)    |
| WNT2   | 7472  | cell motion         | GOTERM_BP_FAT | 1 (P55)     |
| CD72   | 971   | biological adhesion | GOTERM_BP_FAT | 1 (P48)     |
| CD97   | 976   | biological adhesion | GOTERM_BP_FAT | 1 (P53)     |
| ASTN1  | 460   | biological adhesion | GOTERM_BP_FAT | 1 (P48)     |
| CLSTN1 | 22883 | biological adhesion | GOTERM_BP_FAT | 1 (P48)     |
| CLSTN2 | 64084 | biological adhesion | GOTERM_BP_FAT | 1 (P48)     |
| CTNNA3 | 29119 | biological adhesion | GOTERM_BP_FAT | 1 (P48)     |
| COL5A3 | 50509 | biological adhesion | GOTERM_BP_FAT | 2 (P48;P56) |
| DDR1   | 780   | biological adhesion | GOTERM_BP_FAT | 1 (P48)     |
| DLG1   | 1739  | biological adhesion | GOTERM_BP_FAT | 1 (P50)     |
| ITGA6  | 3655  | biological adhesion | GOTERM_BP_FAT | 1 (P51)     |
| NEDD9  | 4739  | biological adhesion | GOTERM_BP_FAT | 1 (P52)     |
| NRXN2  | 9379  | biological adhesion | GOTERM_BP_FAT | 1 (P52)     |
| NFASC  | 23114 | biological adhesion | GOTERM_BP_FAT | 1 (P52)     |
| NRCAM  | 4897  | biological adhesion | GOTERM_BP_FAT | 1 (P56)     |

|          |       |                     |               |             |
|----------|-------|---------------------|---------------|-------------|
| PVRL1    | 5818  | biological adhesion | GOTERM_BP_FAT | 1 (P47)     |
| PTPRS    | 5802  | biological adhesion | GOTERM_BP_FAT | 1 (P48)     |
| PCDH21   | 92211 | biological adhesion | GOTERM_BP_FAT | 1 (P929)    |
| CDHR2    | 54825 | biological adhesion | GOTERM_BP_FAT | 1 (P51)     |
| PCDHB1   | 29930 | biological adhesion | GOTERM_BP_FAT | 1 (P48)     |
| PCDHB6   | 56130 | biological adhesion | GOTERM_BP_FAT | 1 (P48)     |
| SIGLEC1  | 6614  | biological adhesion | GOTERM_BP_FAT | 1 (P56)     |
| SIGLEC12 | 89858 | biological adhesion | GOTERM_BP_FAT | 1 (P929)    |
| SIGLEC8  | 27181 | biological adhesion | GOTERM_BP_FAT | 1 (P55)     |
| SPOCK1   | 6695  | biological adhesion | GOTERM_BP_FAT | 1 (P56)     |
| STAB1    | 23166 | biological adhesion | GOTERM_BP_FAT | 1 (P50)     |
| VCAM1    | 7412  | biological adhesion | GOTERM_BP_FAT | 1 (P929)    |
| CD72     | 971   | cell adhesion       | GOTERM_BP_FAT | 1 (P48)     |
| CD97     | 976   | cell adhesion       | GOTERM_BP_FAT | 1 (P53)     |
| ASTN1    | 460   | cell adhesion       | GOTERM_BP_FAT | 1 (P48)     |
| CLSTN1   | 22883 | cell adhesion       | GOTERM_BP_FAT | 1 (P48)     |
| CLSTN2   | 64084 | cell adhesion       | GOTERM_BP_FAT | 1 (P48)     |
| CTNNA3   | 29119 | cell adhesion       | GOTERM_BP_FAT | 1 (P48)     |
| COL5A3   | 50509 | cell adhesion       | GOTERM_BP_FAT | 2 (P48;P56) |
| DDR1     | 780   | cell adhesion       | GOTERM_BP_FAT | 1 (P48)     |
| DLG1     | 1739  | cell adhesion       | GOTERM_BP_FAT | 1 (P50)     |
| ITGA6    | 3655  | cell adhesion       | GOTERM_BP_FAT | 1 (P51)     |
| NEDD9    | 4739  | cell adhesion       | GOTERM_BP_FAT | 1 (P52)     |
| NRXN2    | 9379  | cell adhesion       | GOTERM_BP_FAT | 1 (P52)     |
| NFASC    | 23114 | cell adhesion       | GOTERM_BP_FAT | 1 (P52)     |
| NRCAM    | 4897  | cell adhesion       | GOTERM_BP_FAT | 1 (P56)     |
| PVRL1    | 5818  | cell adhesion       | GOTERM_BP_FAT | 1 (P47)     |
| PTPRS    | 5802  | cell adhesion       | GOTERM_BP_FAT | 1 (P48)     |



|          |       |                                                |               |          |
|----------|-------|------------------------------------------------|---------------|----------|
| PCDH21   | 92211 | cell adhesion                                  | GOTERM_BP_FAT | 1 (P929) |
| CDHR2    | 54825 | cell adhesion                                  | GOTERM_BP_FAT | 1 (P51)  |
| PCDHB1   | 29930 | cell adhesion                                  | GOTERM_BP_FAT | 1 (P48)  |
| PCDHB6   | 56130 | cell adhesion                                  | GOTERM_BP_FAT | 1 (P48)  |
| SIGLEC1  | 6614  | cell adhesion                                  | GOTERM_BP_FAT | 1 (P56)  |
| SIGLEC12 | 89858 | cell adhesion                                  | GOTERM_BP_FAT | 1 (P929) |
| SIGLEC8  | 27181 | cell adhesion                                  | GOTERM_BP_FAT | 1 (P55)  |
| SPOCK1   | 6695  | cell adhesion                                  | GOTERM_BP_FAT | 1 (P56)  |
| STAB1    | 23166 | cell adhesion                                  | GOTERM_BP_FAT | 1 (P50)  |
| VCAM1    | 7412  | cell adhesion                                  | GOTERM_BP_FAT | 1 (P929) |
| ANK3     | 288   | cell morphogenesis involved in differentiation | GOTERM_BP_FAT | 1 (P53)  |
| ATL1     | 51062 | cell morphogenesis involved in differentiation | GOTERM_BP_FAT | 1 (P47)  |
| CCKAR    | 886   | cell morphogenesis involved in differentiation | GOTERM_BP_FAT | 1 (P50)  |
| DCC      | 1630  | cell morphogenesis involved in differentiation | GOTERM_BP_FAT | 1 (P47)  |
| HOXA1    | 3198  | cell morphogenesis involved in differentiation | GOTERM_BP_FAT | 1 (P52)  |
| MAP1B    | 4131  | cell morphogenesis involved in differentiation | GOTERM_BP_FAT | 1 (P48)  |
| NTNG1    | 22854 | cell morphogenesis involved in differentiation | GOTERM_BP_FAT | 1 (P48)  |
| NFASC    | 23114 | cell morphogenesis involved in differentiation | GOTERM_BP_FAT | 1 (P52)  |
| NRCAM    | 4897  | cell morphogenesis involved in differentiation | GOTERM_BP_FAT | 1 (P56)  |
| NR2E1    | 7101  | cell morphogenesis involved in differentiation | GOTERM_BP_FAT | 1 (P48)  |
| PVRL1    | 5818  | cell morphogenesis involved in differentiation | GOTERM_BP_FAT | 1 (P47)  |
| PTPRZ1   | 5803  | cell morphogenesis involved in differentiation | GOTERM_BP_FAT | 1 (P48)  |
| SEMA3A   | 10371 | cell morphogenesis involved in differentiation | GOTERM_BP_FAT | 1 (P53)  |
| ANK3     | 288   | cell morphogenesis                             | GOTERM_BP_FAT | 1 (P53)  |
| ATL1     | 51062 | cell morphogenesis                             | GOTERM_BP_FAT | 1 (P47)  |
| CCKAR    | 886   | cell morphogenesis                             | GOTERM_BP_FAT | 1 (P50)  |
| DOCK2    | 1794  | cell morphogenesis                             | GOTERM_BP_FAT | 1 (P56)  |
| DCC      | 1630  | cell morphogenesis                             | GOTERM_BP_FAT | 1 (P47)  |

|        |       |                                |               |             |
|--------|-------|--------------------------------|---------------|-------------|
| DLG1   | 1739  | cell morphogenesis             | GOTERM_BP_FAT | 1 (P50)     |
| HOXA1  | 3198  | cell morphogenesis             | GOTERM_BP_FAT | 1 (P52)     |
| LIFR   | 3977  | cell morphogenesis             | GOTERM_BP_FAT | 1 (P55)     |
| MAP1B  | 4131  | cell morphogenesis             | GOTERM_BP_FAT | 1 (P48)     |
| NTNG1  | 22854 | cell morphogenesis             | GOTERM_BP_FAT | 1 (P48)     |
| NFASC  | 23114 | cell morphogenesis             | GOTERM_BP_FAT | 1 (P52)     |
| NRCAM  | 4897  | cell morphogenesis             | GOTERM_BP_FAT | 1 (P56)     |
| NR2E1  | 7101  | cell morphogenesis             | GOTERM_BP_FAT | 1 (P48)     |
| PVRL1  | 5818  | cell morphogenesis             | GOTERM_BP_FAT | 1 (P47)     |
| PTPRZ1 | 5803  | cell morphogenesis             | GOTERM_BP_FAT | 1 (P48)     |
| SEMA3A | 10371 | cell morphogenesis             | GOTERM_BP_FAT | 1 (P53)     |
| TNIP1  | 10318 | glycoprotein metabolic process | GOTERM_BP_FAT | 1 (P50)     |
| GALNT7 | 51809 | glycoprotein metabolic process | GOTERM_BP_FAT | 1 (P48)     |
| COG7   | 91949 | glycoprotein metabolic process | GOTERM_BP_FAT | 1 (P48)     |
| DSE    | 29940 | glycoprotein metabolic process | GOTERM_BP_FAT | 2 (P48;P50) |
| FUT10  | 84750 | glycoprotein metabolic process | GOTERM_BP_FAT | 1 (P50)     |
| FUT9   | 10690 | glycoprotein metabolic process | GOTERM_BP_FAT | 1 (P48)     |
| GYPC   | 2995  | glycoprotein metabolic process | GOTERM_BP_FAT | 1 (P56)     |
| IDE    | 3416  | glycoprotein metabolic process | GOTERM_BP_FAT | 1 (P52)     |
| LRP2   | 4036  | glycoprotein metabolic process | GOTERM_BP_FAT | 1 (P55)     |
| PSENN  | 55851 | glycoprotein metabolic process | GOTERM_BP_FAT | 1 (P56)     |
| POMT2  | 29954 | glycoprotein metabolic process | GOTERM_BP_FAT | 1 (P48)     |
| ASTN1  | 460   | cell-cell adhesion             | GOTERM_BP_FAT | 1 (P48)     |
| CLSTN1 | 22883 | cell-cell adhesion             | GOTERM_BP_FAT | 1 (P48)     |
| CLSTN2 | 64084 | cell-cell adhesion             | GOTERM_BP_FAT | 1 (P48)     |
| CTNNA3 | 29119 | cell-cell adhesion             | GOTERM_BP_FAT | 1 (P48)     |
| DLG1   | 1739  | cell-cell adhesion             | GOTERM_BP_FAT | 1 (P50)     |
| NRCAM  | 4897  | cell-cell adhesion             | GOTERM_BP_FAT | 1 (P56)     |

|          |        |                    |               |          |
|----------|--------|--------------------|---------------|----------|
| PVRL1    | 5818   | cell-cell adhesion | GOTERM_BP_FAT | 1 (P47)  |
| PCDH21   | 92211  | cell-cell adhesion | GOTERM_BP_FAT | 1 (P929) |
| CDHR2    | 54825  | cell-cell adhesion | GOTERM_BP_FAT | 1 (P51)  |
| PCDHB1   | 29930  | cell-cell adhesion | GOTERM_BP_FAT | 1 (P48)  |
| PCDHB6   | 56130  | cell-cell adhesion | GOTERM_BP_FAT | 1 (P48)  |
| SIGLEC1  | 6614   | cell-cell adhesion | GOTERM_BP_FAT | 1 (P56)  |
| VCAM1    | 7412   | cell-cell adhesion | GOTERM_BP_FAT | 1 (P929) |
| POU3F3   | 5455   | cell motility      | GOTERM_BP_FAT | 1 (P48)  |
| ASTN1    | 460    | cell motility      | GOTERM_BP_FAT | 1 (P48)  |
| CATSPER1 | 117144 | cell motility      | GOTERM_BP_FAT | 1 (P48)  |
| CCKAR    | 886    | cell motility      | GOTERM_BP_FAT | 1 (P50)  |
| DOCK2    | 1794   | cell motility      | GOTERM_BP_FAT | 1 (P56)  |
| DCC      | 1630   | cell motility      | GOTERM_BP_FAT | 1 (P47)  |
| EDN3     | 1908   | cell motility      | GOTERM_BP_FAT | 1 (P51)  |
| GDNF     | 2668   | cell motility      | GOTERM_BP_FAT | 1 (P929) |
| ITGA6    | 3655   | cell motility      | GOTERM_BP_FAT | 1 (P51)  |
| NRCAM    | 4897   | cell motility      | GOTERM_BP_FAT | 1 (P56)  |
| NR2E1    | 7101   | cell motility      | GOTERM_BP_FAT | 1 (P48)  |
| VCAM1    | 7412   | cell motility      | GOTERM_BP_FAT | 1 (P929) |
| WNT2     | 7472   | cell motility      | GOTERM_BP_FAT | 1 (P55)  |
| POU3F3   | 5455   | cell migration     | GOTERM_BP_FAT | 1 (P48)  |
| ASTN1    | 460    | cell migration     | GOTERM_BP_FAT | 1 (P48)  |
| CCKAR    | 886    | cell migration     | GOTERM_BP_FAT | 1 (P50)  |
| DOCK2    | 1794   | cell migration     | GOTERM_BP_FAT | 1 (P56)  |
| DCC      | 1630   | cell migration     | GOTERM_BP_FAT | 1 (P47)  |
| EDN3     | 1908   | cell migration     | GOTERM_BP_FAT | 1 (P51)  |
| GDNF     | 2668   | cell migration     | GOTERM_BP_FAT | 1 (P929) |
| ITGA6    | 3655   | cell migration     | GOTERM_BP_FAT | 1 (P51)  |

|        |        |                                                        |               |          |
|--------|--------|--------------------------------------------------------|---------------|----------|
| NRCAM  | 4897   | cell migration                                         | GOTERM_BP_FAT | 1 (P56)  |
| NR2E1  | 7101   | cell migration                                         | GOTERM_BP_FAT | 1 (P48)  |
| VCAM1  | 7412   | cell migration                                         | GOTERM_BP_FAT | 1 (P929) |
| WNT2   | 7472   | cell migration                                         | GOTERM_BP_FAT | 1 (P55)  |
| HTRA3  | 94031  | regulation of cell growth                              | GOTERM_BP_FAT | 1 (P53)  |
| DDR1   | 780    | regulation of cell growth                              | GOTERM_BP_FAT | 1 (P48)  |
| MAP1B  | 4131   | regulation of cell growth                              | GOTERM_BP_FAT | 1 (P48)  |
| NPR1   | 4881   | regulation of cell growth                              | GOTERM_BP_FAT | 1 (P929) |
| NRCAM  | 4897   | regulation of cell growth                              | GOTERM_BP_FAT | 1 (P56)  |
| PRKCQ  | 5588   | regulation of cell growth                              | GOTERM_BP_FAT | 1 (P55)  |
| CDHR2  | 54825  | regulation of cell growth                              | GOTERM_BP_FAT | 1 (P51)  |
| SEMA3A | 10371  | regulation of cell growth                              | GOTERM_BP_FAT | 1 (P53)  |
| TP53   | 7157   | regulation of cell growth                              | GOTERM_BP_FAT | 1 (P56)  |
| IGSF10 | 285313 | regeneration                                           | GOTERM_BP_FAT | 1 (P56)  |
| LIFR   | 3977   | regeneration                                           | GOTERM_BP_FAT | 1 (P55)  |
| LRP2   | 4036   | regeneration                                           | GOTERM_BP_FAT | 1 (P55)  |
| MAP1B  | 4131   | regeneration                                           | GOTERM_BP_FAT | 1 (P48)  |
| PRKCQ  | 5588   | regeneration                                           | GOTERM_BP_FAT | 1 (P55)  |
| ARID1A | 8289   | positive regulation of transcription,<br>DNA-dependent | GOTERM_BP_FAT | 2 (P56)  |
| CTCF   | 10664  | positive regulation of transcription,<br>DNA-dependent | GOTERM_BP_FAT | 1 (P929) |
| GLIS1  | 148979 | positive regulation of transcription,<br>DNA-dependent | GOTERM_BP_FAT | 1 (P50)  |
| POU1F1 | 5449   | positive regulation of transcription,<br>DNA-dependent | GOTERM_BP_FAT | 1 (P50)  |
| POU3F3 | 5455   | positive regulation of transcription,<br>DNA-dependent | GOTERM_BP_FAT | 1 (P48)  |

|          |       |                                                        |               |          |
|----------|-------|--------------------------------------------------------|---------------|----------|
| TBX19    | 9095  | positive regulation of transcription,<br>DNA-dependent | GOTERM_BP_FAT | 1 (P48)  |
| CCNH     | 902   | positive regulation of transcription,<br>DNA-dependent | GOTERM_BP_FAT | 1 (P48)  |
| DRD3     | 1814  | positive regulation of transcription,<br>DNA-dependent | GOTERM_BP_FAT | 1 (P48)  |
| GDNF     | 2668  | positive regulation of transcription,<br>DNA-dependent | GOTERM_BP_FAT | 1 (P929) |
| HOXA1    | 3198  | positive regulation of transcription,<br>DNA-dependent | GOTERM_BP_FAT | 1 (P52)  |
| MTF1     | 4520  | positive regulation of transcription,<br>DNA-dependent | GOTERM_BP_FAT | 1 (P56)  |
| PPARGC1A | 10891 | positive regulation of transcription,<br>DNA-dependent | GOTERM_BP_FAT | 1 (P53)  |
| PLAGL2   | 5326  | positive regulation of transcription,<br>DNA-dependent | GOTERM_BP_FAT | 1 (P48)  |
| RUNX2    | 860   | positive regulation of transcription,<br>DNA-dependent | GOTERM_BP_FAT | 1 (P52)  |
| TP53     | 7157  | positive regulation of transcription,<br>DNA-dependent | GOTERM_BP_FAT | 1 (P56)  |
| ZBTB7B   | 51043 | positive regulation of transcription,<br>DNA-dependent | GOTERM_BP_FAT | 1 (P56)  |
| POU1F1   | 5449  | cell fate commitment                                   | GOTERM_BP_FAT | 1 (P50)  |
| TBX19    | 9095  | cell fate commitment                                   | GOTERM_BP_FAT | 1 (P48)  |
| GDNF     | 2668  | cell fate commitment                                   | GOTERM_BP_FAT | 1 (P929) |
| GCM1     | 8521  | cell fate commitment                                   | GOTERM_BP_FAT | 1 (P48)  |
| NR2E1    | 7101  | cell fate commitment                                   | GOTERM_BP_FAT | 1 (P48)  |
| RUNX2    | 860   | cell fate commitment                                   | GOTERM_BP_FAT | 1 (P52)  |

TP53

7157

cell fate commitment

GOTERM\_BP\_FAT

1 (P56)

---

**Supplementary Table 10. The ARID1A mutations were found in the HCCs with different etiologies and cell lines.**

| ARID1A mutations profile |                      |                      |                              |                      |                      |       |                              |
|--------------------------|----------------------|----------------------|------------------------------|----------------------|----------------------|-------|------------------------------|
| Etiologies               | Total examined cases | Cases with mutations | <i>P</i> -value <sup>a</sup> | Non-silent mutations | Synonymous mutations | dN/dS | <i>P</i> -value <sup>b</sup> |
| HBV                      | 110                  | 14                   | —                            | 22                   | 1                    | 22:1  | 4.88 ×10 <sup>-3</sup>       |
| HCV                      | 26                   | 2                    | 0.74                         | 2                    | 0                    | 2:0   | 0.60                         |
| HBV plus HCV             | 1                    | 1                    | 0.14                         | 1                    | 0                    | 1:0   | 0.75                         |
| Nonviral                 | 10                   | 1                    | 1.00                         | 1                    | 0                    | 1:0   | 0.75                         |
| Total                    | 147                  | 18                   | —                            | 26                   | 1                    | 26:1  | 5.07 ×10 <sup>-3</sup>       |

<sup>a</sup>The statistical significance of ARID1A mutations in HCC cases with different etiologies was calculated with the chi-squared test, as compared to ARID1A mutations occurred in HBV-infected HCCs. <sup>b</sup>Statistical-analyses were performed with a Fisher's exact test to distinguish between the observed results and a null model (dN/dS = 2).

| Sample Names | Tissue and cell types  | mRNA positions | Nucleotides (cDNA)                                                                                              | Amino acids (protein) | Mutation types |
|--------------|------------------------|----------------|-----------------------------------------------------------------------------------------------------------------|-----------------------|----------------|
| HCC-LM6      | Cell line              | 433            | c.60_62delGGC                                                                                                   | p.del21Pro            | indel          |
| PLC/PRF/5    | Cell line              | 501            | c.128_129dupGGC                                                                                                 | p.ins46Ala            | indel          |
| HCC-171#     | HCV-infected HCC       | 564            | c.191_204delGGCCGCCGAGCCGCT                                                                                     | fs                    | indel          |
| HCC-157#     | Non-viral-infected HCC | 691            | c.317_409delCGCGGGCCCTAGGCCCGCCCTG<br>AACAATAACCTCACGGAGCCCGCCGCGGCGGCGG<br>TGGCGGCAGCAGCGATGGGGTGGGGGCGCCTCCTC | fs                    | Indel          |

|          |                           |      |                           |              |            |
|----------|---------------------------|------|---------------------------|--------------|------------|
| HCC-165# | HBV plus HCV-infected HCC | 1059 | c.686A>G                  | p.Tyr229Cys  | missense   |
| *HCC-55# | HBV-infected HCC          | 1069 | c.696C>G                  | p.Ser232Arg  | missense   |
| Hep3B    | Cell line                 | 1206 | c.833G>C                  | p.Gly278Ala  | missense   |
| YY-8103  | Cell line                 | 1206 | c.833G>C                  | p.Gly278Ala  | missense   |
| HCC-61#  | HBV-infected HCC          | 1710 | c.1337_1338delCT          | fs           | Indel      |
| *HCC-72# | HBV-infected HCC          | 2132 | c.1759T>A                 | p.Ser587Thr  | missense   |
| HCC-7#   | HBV-infected HCC          | 2796 | c.2423G>A                 | p.Gly808Asp  | missense   |
| HCC-40#  | HBV-infected HCC          | 3149 | c.2776A>G                 | p.Thr926Ala  | missense   |
| HCC-63#  | HBV-infected HCC          | 3149 | c.2776A>G                 | p.Thr926Ala  | missense   |
| HCC-34#  | HBV-infected HCC          | 3477 | c.3104C>A                 | p.Ala1035Asp | missense   |
| HCC-61#  | HBV-infected HCC          | 3512 | c.3139delA                | fs           | Indel      |
| HCC-140# | HCV-infected HCC          | 3593 | c.3220C>T                 | p.Arg1074Trp | missense   |
| *HCC-56  | HBV-infected HCC          | 4006 | c.3633T>A                 | p.Tyr1211*   | nonsense   |
| *HCC-56  | HBV-infected HCC          | 4008 | c.3635A>T                 | p.Gln1212Leu | missense   |
| HCC-81#  | HBV-infected HCC          | 4649 | c.4276G>A                 | p.Asp1426Asn | missense   |
| HCC-18#  | HBV-infected HCC          | 4754 | c.4381C>T                 | p.Arg1461*   | nonsense   |
| HCC-82#  | HBV-infected HCC          | 5771 | c.5398A>G                 | p.Asn1800Asp | missense   |
| HCC-82#  | HBV-infected HCC          | 5779 | c.5406_5413delGGAGAAGCTGA | fs           | Indel      |
| HCC-82#  | HBV-infected HCC          | 5796 | c.5423A>C                 | p.Lys1808Thr | missense   |
| HCC-81#  | HBV-infected HCC          | 6346 | c.5973_5974delGT          | fs           | Indel      |
| HCC-LM6  | Cell line                 | 6503 | c.6130A>G                 | p.Asn2044Asp | missense   |
| HCC-47#  | HBV-infected HCC          | 6543 | c.6170G>A                 | p.Arg2057Gln | missense   |
| HCC-47#  | HBV-infected HCC          | 6544 | c.6171G>A                 | p.Arg2057Arg | synonymous |
| HCC-47#  | HBV-infected HCC          | 6557 | c.6184G>A                 | p.Val2062Ile | missense   |
| HCC-LM6  | Cell line                 | 6613 | c.6240T>G                 | p.Ile2080Met | missense   |
| HCC-31#  | HBV-infected HCC          | 7084 | c.6711_6712delGC          | fs           | Indel      |
| *HCC-68# | HBV-infected HCC          | 7174 | c.6801G>A                 | p.Met2267Ile | missense   |



|         |           |      |           |       |            |
|---------|-----------|------|-----------|-------|------------|
| HCC-LM6 | Cell line | 463  | c.90G>A   | P.(=) | synonymous |
| HCC-LM6 | Cell line | 6244 | c.5871C>T | P.(=) | synonymous |
| HCC-LM6 | Cell line | 6253 | c.5880C>T | P.(=) | synonymous |
| HCC-LM6 | Cell line | 6301 | c.5928T>C | P.(=) | synonymous |
| HCC-LM6 | Cell line | 6307 | c.5934C>T | P.(=) | synonymous |
| HCC-LM6 | Cell line | 6316 | c.5943C>T | P.(=) | synonymous |
| HCC-LM6 | Cell line | 6325 | c.5952G>C | P.(=) | synonymous |
| HCC-LM6 | Cell line | 6337 | c.5964T>C | P.(=) | synonymous |
| HCC-LM6 | Cell line | 6340 | c.5967A>G | P.(=) | synonymous |
| HCC-LM6 | Cell line | 6349 | c.5976A>G | P.(=) | synonymous |
| HCC-LM6 | Cell line | 6364 | c.5991T>C | P.(=) | synonymous |
| HCC-LM6 | Cell line | 6400 | c.6027C>T | P.(=) | synonymous |
| HCC-LM6 | Cell line | 6442 | c.6069A>G | P.(=) | synonymous |
| HCC-LM6 | Cell line | 6469 | c.6096A>G | P.(=) | synonymous |
| HCC-LM6 | Cell line | 6502 | c.6129C>T | P.(=) | synonymous |
| HCC-LM6 | Cell line | 6544 | c.6171G>A | P.(=) | synonymous |
| HCC-LM6 | Cell line | 6553 | c.6180C>G | P.(=) | synonymous |
| HCC-LM6 | Cell line | 6554 | c.6181T>C | P.(=) | synonymous |
| HCC-LM6 | Cell line | 6559 | c.6186T>C | P.(=) | synonymous |
| HCC-LM6 | Cell line | 6562 | c.6189A>C | P.(=) | synonymous |
| HCC-LM6 | Cell line | 6583 | c.6210G>A | P.(=) | synonymous |
| HCC-LM6 | Cell line | 6595 | c.6222T>C | P.(=) | synonymous |
| HCC-LM6 | Cell line | 6601 | c.6228C>T | P.(=) | synonymous |
| HCC-LM6 | Cell line | 6604 | c.6231C>T | P.(=) | synonymous |
| HCC-LM6 | Cell line | 6682 | c.6309T>C | P.(=) | synonymous |
| HCC-LM6 | Cell line | 6685 | c.6312C>A | P.(=) | synonymous |
| HCC-LM6 | Cell line | 6691 | c.6318G>A | P.(=) | synonymous |
| HCC-LM6 | Cell line | 6709 | c.6336T>C | P.(=) | synonymous |

|         |           |      |           |       |            |
|---------|-----------|------|-----------|-------|------------|
| HCC-LM6 | Cell line | 6715 | c.6342G>C | P.(=) | synonymous |
| HCC-LM6 | Cell line | 6722 | c.6349C>T | P.(=) | synonymous |
| HCC-LM6 | Cell line | 6778 | c.6405T>C | P.(=) | synonymous |
| HCC-LM6 | Cell line | 6787 | c.6414A>T | P.(=) | synonymous |
| HCC-LM6 | Cell line | 6793 | c.6420C>T | P.(=) | synonymous |
| HCC-LM6 | Cell line | 6796 | c.6423C>T | P.(=) | synonymous |
| HCC-LM6 | Cell line | 6820 | c.6447C>T | P.(=) | synonymous |
| HCC-LM6 | Cell line | 6823 | c.6450T>C | P.(=) | synonymous |
| HCC-LM6 | Cell line | 6820 | c.6447C>T | P.(=) | synonymous |
| HCC-LM6 | Cell line | 6823 | c.6450T>C | P.(=) | synonymous |
| HCC-LM6 | Cell line | 6889 | c.6516C>A | P.(=) | synonymous |
| HCC-LM6 | Cell line | 6892 | c.6519C>T | P.(=) | synonymous |
| HCC-LM6 | Cell line | 6898 | c.6525C>T | P.(=) | synonymous |
| HCC-LM6 | Cell line | 6919 | c.6546T>C | P.(=) | synonymous |
| HCC-LM6 | Cell line | 6922 | c.6549T>G | P.(=) | synonymous |
| HCC-LM6 | Cell line | 6946 | c.6573T>C | P.(=) | synonymous |
| HCC-LM6 | Cell line | 6964 | c.6591C>T | P.(=) | synonymous |
| HCC-LM6 | Cell line | 6970 | c.6597A>G | P.(=) | synonymous |
| HCC-LM6 | Cell line | 6985 | c.6612C>T | P.(=) | synonymous |
| HCC-LM6 | Cell line | 7012 | c.6639C>A | P.(=) | synonymous |
| HCC-LM6 | Cell line | 7021 | c.6648C>G | P.(=) | synonymous |
| HCC-LM6 | Cell line | 7024 | c.6651C>T | P.(=) | synonymous |
| HCC-LM6 | Cell line | 7033 | c.6660C>T | P.(=) | synonymous |
| HCC-LM6 | Cell line | 7045 | c.6672G>A | P.(=) | synonymous |
| HCC-LM6 | Cell line | 7081 | c.6708C>A | P.(=) | synonymous |
| HCC-LM6 | Cell line | 7084 | c.6711G>A | P.(=) | synonymous |
| HCC-LM6 | Cell line | 7094 | c.6721T>C | P.(=) | synonymous |
| HCC-LM6 | Cell line | 7108 | c.6735C>T | P.(=) | synonymous |

|         |           |      |           |       |            |
|---------|-----------|------|-----------|-------|------------|
| HCC-LM6 | Cell line | 7125 | c.6752T>C | P.(=) | synonymous |
| HCC-LM6 | Cell line | 7135 | c.6762C>T | P.(=) | synonymous |
| HCC-LM6 | Cell line | 7138 | c.6765A>G | P.(=) | synonymous |
| HCC-LM6 | Cell line | 7159 | c.6786G>C | P.(=) | synonymous |
| HCC-LM6 | Cell line | 7162 | c.6789A>G | P.(=) | synonymous |
| HCC-LM6 | Cell line | 7168 | c.6795G>A | P.(=) | synonymous |
| HCC-LM6 | Cell line | 7169 | c.6796T>C | P.(=) | synonymous |

### TP53 mutation profile in HBV-infected HCC cases

|          |                  |     |                    |               |          |
|----------|------------------|-----|--------------------|---------------|----------|
| *HCC-68# | HBV-infected HCC | 325 | c.128T>A           | p.Leu43Stop   | nonsense |
| HCC-30#  | HBV-infected HCC | 399 | c.202G>T           | p.Glu68Stop   | nonsense |
| HCC-71#  | HBV-infected HCC | 465 | c.268_269insC      | fs            | indel    |
| HCC-52#  | HBV-infected HCC | 603 | c.406C>T           | p.Gln136Stop  | nonsense |
| HCC-56#  | HBV-infected HCC | 625 | c.428_429insG      | fs            | indel    |
| HCC-56#  | HBV-infected HCC | 627 | c.430_435delTGCAGC | fs            | indel    |
| HCC-87#  | HBV-infected HCC | 649 | c.452C>G           | p.Pro151Arg   | missense |
| HCC-29#  | HBV-infected HCC | 669 | c.472_473insT      | fs            | indel    |
| HCC-32#  | HBV-infected HCC | 670 | c.473G>A           | p.Arg 158 His | missense |
| HCC-67#  | HBV-infected HCC | 672 | c.475G>C           | p.Ala159Pro   | missense |
| HCC-17#  | HBV-infected HCC | 721 | c.524G>A           | p.Arg175His   | missense |
| HCC-95#  | HBV-infected HCC | 724 | c.527G>T           | p.Cys176Phe   | missense |
| HCC-65#  | HBV-infected HCC | 724 | c.527G>T           | p.Cys176Phe   | missense |
| *HCC-72# | HBV-infected HCC | 756 | c.559G>A           | p.Gly187Ser   | missense |
| HCC-24#  | HBV-infected HCC | 774 | c.577C>T           | p.His193Tyr   | missense |
| HCC-88#  | HBV-infected HCC | 811 | c.614A>G           | p.Tyr205Cys   | missense |
| HCC-43#  | HBV-infected HCC | 811 | c.614A>G           | p.Tyr205Cys   | missense |

|          |                  |      |                       |              |          |
|----------|------------------|------|-----------------------|--------------|----------|
| HCC-45#  | HBV-infected HCC | 812  | c.615T>G              | p.Tyr205Stop | nonsense |
| HCC-42#  | HBV-infected HCC | 841  | c.644G>T              | p.Ser215Ile  | missense |
| *HCC-56  | HBV-infected HCC | 856  | c.659T>C              | p.Tyr220Cys  | missense |
| HCC-15#  | HBV-infected HCC | 898  | c.701A>G              | p.Tyr234Cys  | missense |
| HCC-93#  | HBV-infected HCC | 922  | c.725G>T              | p.Cys242Phe  | missense |
| HCC-11#  | HBV-infected HCC | 933  | c.736A>G              | p.Met246Val  | missense |
| HCC-31#  | HBV-infected HCC | 943  | c.746G>C              | p.Arg249Thr  | missense |
| HCC-15#  | HBV-infected HCC | 944  | c.747G>T              | p.Arg249Ser  | missense |
| HCC-93#  | HBV-infected HCC | 944  | c.747G>T              | p.Arg249Ser  | missense |
| HCC-48   | HBV-infected HCC | 948  | c.751T>A              | p.Ile251Phe  | missense |
| HCC-58#  | HBV-infected HCC | 951  | c.754_762delCTCACCATC | fs           | indel    |
| HCC-11#  | HBV-infected HCC | 972  | c.775G>T              | p.Asp259Tyr  | missense |
| HCC-96#  | HBV-infected HCC | 997  | c.800G>C              | p.Arg267Pro  | missense |
| HCC-53#  | HBV-infected HCC | 1041 | c.844C>T              | p.Arg282Trp  | missense |
| HCC-38#  | HBV-infected HCC | 1117 | c.920C>T              | p.Ala307Val  | missense |
| HCC-77#  | HBV-infected HCC |      | splice site           |              |          |
| *HCC-55# | HBV-infected HCC |      | splice site           |              |          |
| HCC-38#  | HBV-infected HCC |      | splice site           |              |          |

Note: \* indicated the cases harboring *TP53* and *ARID1A* mutant.

**Supplementary Table 11. Summary of the mutated genes examined using PCR-based Sanger sequencing in additional HCC samples.**

| Gene symbol     | Number of examined samples | Number of mutated samples | Nucleotide variations (cDNA) | Amino acid variations (protein) |
|-----------------|----------------------------|---------------------------|------------------------------|---------------------------------|
| <i>PFKFB2</i>   | 117                        | 1                         | c.G1487A                     | p.Arg496His                     |
| <i>PIK3AP1</i>  | 116                        | 1                         | c.C1581T                     | p.(=)                           |
| <i>KIAA0776</i> | 112                        | 1                         | c.A2283G                     | p.(=)                           |
| <i>TMEM35</i>   | 117                        | 1                         | c.A427T                      | p.Lys143Trp                     |
| <i>IGSF10</i>   | 120                        | 1                         | c.T4752A                     | p.(=)                           |
| <i>HOXA1</i>    | 118                        | 1                         | c.G568A                      | p.Arg289His                     |
| <i>ATL1</i>     | 120                        | 1                         | c.A84G                       | p.(=)                           |
| <i>VCAM1</i>    | 89                         | 1                         | c.C728T                      | p.Thr243Ile                     |
| <i>ABCA1</i>    | 120                        | 0                         | —                            | —                               |
| <i>ABCB5</i>    | 120                        | 0                         | —                            | —                               |
| <i>ALDH2</i>    | 120                        | 0                         | —                            | —                               |
| <i>AMPH</i>     | 116                        | 0                         | —                            | —                               |
| <i>ANKRD53</i>  | 117                        | 0                         | —                            | —                               |
| <i>APAF1</i>    | 120                        | 0                         | —                            | —                               |
| <i>ARID2</i>    | 120                        | 0                         | —                            | —                               |
| <i>ARMC4</i>    | 113                        | 0                         | —                            | —                               |

|                 |     |   |   |   |
|-----------------|-----|---|---|---|
| <i>ASB13</i>    | 114 | 0 | — | — |
| <i>ATP5S</i>    | 120 | 0 | — | — |
| <i>BRIP1</i>    | 117 | 0 | — | — |
| <i>BRMS1</i>    | 119 | 0 | — | — |
| <i>BRWD1</i>    | 116 | 0 | — | — |
| <i>C10orf92</i> | 119 | 0 | — | — |
| <i>C1orf14</i>  | 116 | 0 | — | — |
| <i>C1orf77</i>  | 114 | 0 | — | — |
| <i>C6orf168</i> | 120 | 0 | — | — |
| <i>C9orf125</i> | 119 | 0 | — | — |
| <i>CAMKV</i>    | 120 | 0 | — | — |
| <i>CATSPER1</i> | 118 | 0 | — | — |
| <i>CCKAR</i>    | 118 | 0 | — | — |
| <i>CDKL4</i>    | 119 | 0 | — | — |
| <i>CHRD1</i>    | 119 | 0 | — | — |
| <i>CHRNA6</i>   | 115 | 0 | — | — |
| <i>CHRND</i>    | 120 | 0 | — | — |
| <i>CIT</i>      | 120 | 0 | — | — |
| <i>CLTC</i>     | 119 | 0 | — | — |
| <i>COTL1</i>    | 120 | 0 | — | — |
| <i>CRYBA4</i>   | 118 | 0 | — | — |
| <i>CTCF</i>     | 120 | 0 | — | — |
| <i>DCHS1</i>    | 116 | 0 | — | — |
| <i>DDX59</i>    | 94  | 0 | — | — |
| <i>DHPS</i>     | 118 | 0 | — | — |

|                |     |   |   |   |
|----------------|-----|---|---|---|
| <i>DHX37</i>   | 119 | 0 | — | — |
| <i>DSE</i>     | 92  | 0 | — | — |
| <i>ETHE1</i>   | 117 | 0 | — | — |
| <i>FAM129B</i> | 120 | 0 | — | — |
| <i>FAM38B</i>  | 114 | 0 | — | — |
| <i>FAM71A</i>  | 120 | 0 | — | — |
| <i>FNTA</i>    | 120 | 0 | — | — |
| <i>FSHR</i>    | 118 | 0 | — | — |
| <i>FUT10</i>   | 120 | 0 | — | — |
| <i>GABRA1</i>  | 120 | 0 | — | — |
| <i>GALNT14</i> | 116 | 0 | — | — |
| <i>GCLC</i>    | 120 | 0 | — | — |
| <i>GCM1</i>    | 88  | 0 | — | — |
| <i>GDNF</i>    | 116 | 0 | — | — |
| <i>GHRHR</i>   | 115 | 0 | — | — |
| <i>GLB1L2</i>  | 120 | 0 | — | — |
| <i>GLUD1</i>   | 120 | 0 | — | — |
| <i>GNB5</i>    | 120 | 0 | — | — |
| <i>GOSR2</i>   | 115 | 0 | — | — |
| <i>GPATCH8</i> | 120 | 0 | — | — |
| <i>GPS1</i>    | 120 | 0 | — | — |
| <i>GTDC1</i>   | 119 | 0 | — | — |
| <i>HCN1</i>    | 119 | 0 | — | — |
| <i>HMCN1</i>   | 120 | 0 | — | — |
| <i>HSPB7</i>   | 117 | 0 | — | — |

|                 |     |   |   |   |
|-----------------|-----|---|---|---|
| <i>HTRA3</i>    | 119 | 0 | — | — |
| <i>IFNA5</i>    | 118 | 0 | — | — |
| <i>INADL</i>    | 119 | 0 | — | — |
| <i>IPO8</i>     | 94  | 0 | — | — |
| <i>IQGAP1</i>   | 118 | 0 | — | — |
| <i>IRAK1BP1</i> | 116 | 0 | — | — |
| <i>IREB2</i>    | 119 | 0 | — | — |
| <i>ITGA6</i>    | 120 | 0 | — | — |
| <i>KCNJ9</i>    | 119 | 0 | — | — |
| <i>KIAA0907</i> | 119 | 0 | — | — |
| <i>LACTB2</i>   | 118 | 0 | — | — |
| <i>LHX9</i>     | 116 | 0 | — | — |
| <i>LIFR</i>     | 120 | 0 | — | — |
| <i>LPHN2</i>    | 120 | 0 | — | — |
| <i>LRP2</i>     | 120 | 0 | — | — |
| <i>LRRIQ1</i>   | 120 | 0 | — | — |
| <i>MANEAL</i>   | 119 | 0 | — | — |
| <i>MAP1B</i>    | 120 | 0 | — | — |
| <i>MCTP2</i>    | 118 | 0 | — | — |
| <i>MDN1</i>     | 118 | 0 | — | — |
| <i>MFSD9</i>    | 118 | 0 | — | — |
| <i>MMP9</i>     | 118 | 0 | — | — |
| <i>MTF1</i>     | 117 | 0 | — | — |
| <i>MYT1</i>     | 120 | 0 | — | — |
| <i>NEDD9</i>    | 113 | 0 | — | — |



|                    |     |   |   |   |
|--------------------|-----|---|---|---|
| <i>NFASC</i>       | 94  | 0 | — | — |
| <i>NLK</i>         | 94  | 0 | — | — |
| <i>NRCAM</i>       | 117 | 0 | — | — |
| <i>NRXN2</i>       | 111 | 0 | — | — |
| <i>NWD1</i>        | 119 | 0 | — | — |
| <i>OR2G3</i>       | 120 | 0 | — | — |
| <i>OR2M5</i>       | 110 | 0 | — | — |
| <i>OR5A2</i>       | 117 | 0 | — | — |
| <i>OR5B12</i>      | 120 | 0 | — | — |
| <i>OR9Q1</i>       | 120 | 0 | — | — |
| <i>PAK6</i>        | 105 | 0 | — | — |
| <i>PAPOLG</i>      | 119 | 0 | — | — |
| <i>PCDH21</i>      | 119 | 0 | — | — |
| <i>PDE10A</i>      | 117 | 0 | — | — |
| <i>PFKFB4</i>      | 109 | 0 | — | — |
| <i>PFTK1/CDK14</i> | 117 | 0 | — | — |
| <i>PLA2G6</i>      | 115 | 0 | — | — |
| <i>PMPCB</i>       | 115 | 0 | — | — |
| <i>POGZ</i>        | 111 | 0 | — | — |
| <i>POU6F2</i>      | 117 | 0 | — | — |
| <i>PPARGC1A</i>    | 106 | 0 | — | — |
| <i>PPM2C</i>       | 116 | 0 | — | — |
| <i>PPP2R1B</i>     | 117 | 0 | — | — |
| <i>PPP6C</i>       | 116 | 0 | — | — |
| <i>PRCC</i>        | 113 | 0 | — | — |

|                 |     |   |   |   |
|-----------------|-----|---|---|---|
| <i>RAB3D</i>    | 104 | 0 | — | — |
| <i>RAG1</i>     | 116 | 0 | — | — |
| <i>RASGRF1</i>  | 112 | 0 | — | — |
| <i>RGL3</i>     | 117 | 0 | — | — |
| <i>RNF17</i>    | 112 | 0 | — | — |
| <i>RUNX2</i>    | 120 | 0 | — | — |
| <i>SCN3A</i>    | 118 | 0 | — | — |
| <i>SGK493</i>   | 106 | 0 | — | — |
| <i>SIGLEC8</i>  | 99  | 0 | — | — |
| <i>SLC39A10</i> | 118 | 0 | — | — |
| <i>SMARCAL1</i> | 116 | 0 | — | — |
| <i>SORL1</i>    | 115 | 0 | — | — |
| <i>SPAG17</i>   | 104 | 0 | — | — |
| <i>SPOCK1</i>   | 119 | 0 | — | — |
| <i>STAMBP</i>   | 85  | 0 | — | — |
| <i>TAF1L</i>    | 110 | 0 | — | — |
| <i>TBX18</i>    | 119 | 0 | — | — |
| <i>TBX19</i>    | 85  | 0 | — | — |
| <i>TMEM2</i>    | 118 | 0 | — | — |
| <i>TNIP1</i>    | 119 | 0 | — | — |
| <i>TRIM68</i>   | 97  | 0 | — | — |
| <i>TRIM9</i>    | 110 | 0 | — | — |
| <i>TSHZ1</i>    | 115 | 0 | — | — |
| <i>TSN</i>      | 118 | 0 | — | — |
| <i>TTC3</i>     | 112 | 0 | — | — |

|                       |     |   |   |   |
|-----------------------|-----|---|---|---|
| <b><i>VCAMI</i></b>   | 119 | 0 | — | — |
| <b><i>XKR7</i></b>    | 114 | 0 | — | — |
| <b><i>ZBTB7B</i></b>  | 116 | 0 | — | — |
| <b><i>ZMAT2</i></b>   | 119 | 0 | — | — |
| <b><i>ZNF671</i></b>  | 119 | 0 | — | — |
| <b><i>ZSCAN16</i></b> | 116 | 0 | — | — |

---

**Supplementary Table 12. The sequences of siRNAs.**

| siRNA ID | Targeting mutated genes | Targeted sequences (sense strand) | Providers  |
|----------|-------------------------|-----------------------------------|------------|
| 1        | ARID1A                  | GCAGGCACCACUAACUUAU               | GenePharma |
| 2        | ARID1A                  | GAUGAGACCUCAGCCAUAU               | GenePharma |
| 3        | C1orf14                 | GGGACAAGAUACUGAUUAACA             | GenePharma |
| 4        | C1orf14                 | GGACCUUUCUUCCAAGAAUU              | GenePharma |
| 5        | C1orf77                 | GCCUGGGUAAGAGUAACAUC              | GenePharma |
| 6        | C1orf77                 | CCACCAAGAUGUCUCUAAAUG             | GenePharma |
| 7        | DDX59                   | GGCCAUUAUUGACUUUGAAC              | GenePharma |
| 8        | DDX59                   | GGCGACUUCUGGAUAUAAUAA             | GenePharma |
| 9        | FAM71A                  | CAAGUAUGCACCGAUUUUGA              | GenePharma |
| 10       | FAM71A                  | GACGGUUGGUUCUAUGACACC             | GenePharma |
| 11       | HMCN1                   | GGGCGAUCCUAAUGUUGAACU             | GenePharma |
| 12       | HMCN1                   | GACCCAUAUUGGAUAUAAAGU             | GenePharma |
| 13       | KCNJ9                   | UGCCAGCUUUCACGAGACUUU             | GenePharma |
| 14       | KCNJ9                   | CUUCGAGAUCGUCGUUAUCCU             | GenePharma |
| 15       | LHX9                    | GGACCAUGAAAUCCUACUUUG             | GenePharma |
| 16       | LHX9                    | GGAGUGGACAUCGUCAAUUAC             | GenePharma |
| 17       | MANEAL                  | CGGAGCACUUCAUCAAAGAGA             | GenePharma |
| 18       | MANEAL                  | GCCUGUAUUUGGACUACCUGC             | GenePharma |
| 19       | NFASC                   | CCCUGCGUAUCACAAAUGUCU             | GenePharma |
| 20       | NFASC                   | CCGCUCUAUAUUGGAAACAGG             | GenePharma |
| 23       | OR2G3                   | GUGGGAAACUUCACCAUAAUC             | GenePharma |
| 24       | OR2G3                   | GUGUGGCGCAACUCUAUAUUU             | GenePharma |
| 25       | OR2M5                   | GCUCUAUGGAUGCAAUCAUUG             | GenePharma |
| 26       | OR2M5                   | CAGGUUUGUUCAUGUACAUAC             | GenePharma |
| 27       | PRCC                    | GGAGAGAAGAAAUCAACUUUG             | GenePharma |
| 28       | PRCC                    | CAGCAAUGGAUGACUAAGUCA             | GenePharma |
| 29       | SPAG17                  | GCUCACCUAACUGAUUUUAUUC            | GenePharma |
| 30       | SPAG17                  | GGAGAUGGAACAACUAUUAAU             | GenePharma |
| 31       | TBX19                   | GCCCAUCGAAUGGUAACAAC              | GenePharma |
| 32       | TBX19                   | CUCCCUCAGUGAAUUUGAUAG             | GenePharma |
| 33       | VCAM1                   | CACCCAAGAAUACAGUUAUUU             | GenePharma |
| 34       | VCAM1                   | GGAGCCUCAAAUAUACUUUGG             | GenePharma |
| 35       | ZBTB7B                  | CUCCUUGAAUUUGCCUAUACA             | GenePharma |
| 36       | ZBTB7B                  | GUAGCCACUACUUCAAGAAGC             | GenePharma |
| 37       | ASB13                   | AUGUGUGAGGCUUCUUAUUGA             | GenePharma |
| 38       | ASB13                   | AGUGCUUCGAGUACUACGAAA             | GenePharma |
| 39       | PCDH21                  | CAGCCUUCUCAAGAUUGACA              | GenePharma |
| 40       | PCDH21                  | CCAGGUACAACUUCUAUGUGA             | GenePharma |
| 41       | PIK3AP1                 | GCUCAAGAGUCACAUUAAAGA             | GenePharma |
| 42       | PIK3AP1                 | GAGGACGAGAAGGUUGUUUCC             | GenePharma |
| 43       | NRXN2                   | CGGCAGGAAACUUUGAUAAACG            | GenePharma |

|    |          |                        |            |
|----|----------|------------------------|------------|
| 44 | NRXN2    | CUGGAGGAGAGUUAAUUAUUGC | GenePharma |
| 45 | NRXN2    | GCUCCAUGUACAUGAAGAUCA  | GenePharma |
| 46 | OR5A2    | CCCAUACACUUUGUUUAAAGA  | GenePharma |
| 47 | OR5A2    | GUGGGUGGGAUCCUUAGUUCU  | GenePharma |
| 48 | OR5B12   | CUGGUGGACUUUGGUUAUUCC  | GenePharma |
| 49 | OR5B12   | GGCCUCUAUAGGAUUCAUAUU  | GenePharma |
| 50 | OR9Q1    | CCAGUGAGAUUGACUUUAUUU  | GenePharma |
| 51 | OR9Q1    | GUCUGCUACUCAUCUAUCACU  | GenePharma |
| 52 | PPP2R1B  | GGGCAUCAAAUGCUGUAAAAG  | GenePharma |
| 53 | PPP2R1B  | CUGAGCAGCUGGGAAAUUUCA  | GenePharma |
| 54 | PPP2R1B  | GUCCUGACGUUCGUUUGAAUA  | GenePharma |
| 55 | SORL1    | GGACCUCACUACUACACAUGG  | GenePharma |
| 56 | SORL1    | GCUCGAACAAAGAGAAUGUCC  | GenePharma |
| 57 | SORL1    | GGCUGCUAGUAACUUUACAGA  | GenePharma |
| 58 | ARID2    | CUCUCGACUUGCAGUAAAUA   | GenePharma |
| 59 | ARID2    | GGGUAGGGUUUCAGAACAUUG  | GenePharma |
| 60 | CIT      | GGGACAGGAAGUACAUUGUCC  | GenePharma |
| 61 | CIT      | CCUCAUACCAGGAUAAAUA    | GenePharma |
| 62 | DHX37    | GGCCUGUUGAAGACUUAUCC   | GenePharma |
| 63 | DHX37    | GUGUGCUGCUUAAAGAAAUCC  | GenePharma |
| 64 | ATL1     | CCGAGAGCCUAGAUUUAAAAG  | GenePharma |
| 65 | ATL1     | GCUCAAUACAGGUUAUAACU   | GenePharma |
| 66 | KIAA1409 | GCUGAGGAAUCCGAAUUUAAG  | GenePharma |
| 67 | KIAA1409 | GCUGCGUAUAUCGCACAAAGA  | GenePharma |
| 68 | TRIM9    | CUGGACAAGAUGAGCCUAUAC  | GenePharma |
| 69 | TRIM9    | CACGGACUUUGACUUGAGUCU  | GenePharma |
| 70 | IQGAP1   | CCCAGUCCUACCAGAAAUUCA  | GenePharma |
| 71 | IQGAP1   | GCUCACGCAAGCUGAAAUUCA  | GenePharma |
| 72 | PAK6     | GAAGUGAUCUCCAGGUCUUUG  | GenePharma |
| 73 | PAK6     | CACAGGUGUUGUGACACAUGA  | GenePharma |
| 74 | RAB27A   | GGACCAGAGAGUAGUGAAAGA  | GenePharma |
| 75 | RAB27A   | GGUGCGAUCAAAUGGUCAUGC  | GenePharma |
| 76 | COTL1    | AGGAGGUCGUACAGAAUUUCG  | GenePharma |
| 77 | COTL1    | UGAGCAAGAGGUCCAAGUUUG  | GenePharma |
| 78 | FAHD1    | GAUCAUAACCUUGGAAGAAGG  | GenePharma |
| 79 | FAHD1    | GGGAGUUGGACCGGUUAAAGA  | GenePharma |
| 80 | BRIP1    | GGAGGCUAAUCAUAUCAUUA   | GenePharma |
| 81 | BRIP1    | GUCCCUACAACUAUCUUCUAG  | GenePharma |
| 82 | GPATCH8  | GAGAGAGUUUGCUCGAAAUGU  | GenePharma |
| 83 | GPATCH8  | GGCCAUCAGAACUAUUAAUUU  | GenePharma |
| 84 | GPS1     | GUGCCCUCAUCCAGUAUUUCA  | GenePharma |
| 85 | GPS1     | GAGACAUCAUCUCAAUUCU    | GenePharma |
| 86 | NLK      | CCGACAGGUUAAAGAAAUAU   | GenePharma |
| 87 | NLK      | GGUGUUGUCUGGUCAGUAACA  | GenePharma |
| 88 | CCBE1    | GCCAUACUGUCUGGAUAUUGA  | GenePharma |

|     |          |                        |            |
|-----|----------|------------------------|------------|
| 89  | CCBE1    | CCUGAUCUGUCCCACAUUAAG  | GenePharma |
| 90  | TSHZ1    | CAGCUUAGCUCUGGAUUUAAA  | GenePharma |
| 91  | TSHZ1    | GCCACUCAAUAGAUUCAAGA   | GenePharma |
| 92  | DHPS     | GGGAUCAAUAGGAUCGGAAC   | GenePharma |
| 93  | DHPS     | GCGACAUGAUCUUCUCCA     | GenePharma |
| 94  | ELL      | GAGGCCAUCUAUCCGAUUUCA  | GenePharma |
| 95  | ELL      | GCAGCAUACAGGACAAGA     | GenePharma |
| 96  | ETHE1    | GGCUGACUUACACAUUGAGGA  | GenePharma |
| 97  | ETHE1    | UCUACCCUGCUCACGAUUACC  | GenePharma |
| 98  | NWD1     | GGAUCGCUCUAUACUUGUUUG  | GenePharma |
| 99  | NWD1     | GAAGAUCGGUGCGGAUUAUCU  | GenePharma |
| 100 | ZNF671   | GGCCCAAUAUUGAAAGAUACC  | GenePharma |
| 101 | ZNF671   | GUCGGAAACACACACUUGUUC  | GenePharma |
| 102 | CHRND    | UCUCCCUGAAAGAAGUUGAGG  | GenePharma |
| 103 | CHRND    | GUGGAUCAUCAUUGAUCCUGA  | GenePharma |
| 104 | FSHR     | GCUGAAUCUAAGCGAUAAUAA  | GenePharma |
| 105 | FSHR     | GUGCUAGUGAUCCUAACUACC  | GenePharma |
| 106 | MFSD9    | GUGAUGGGAAUAGUAAAUUA   | GenePharma |
| 107 | MFSD9    | GGCUACCUCAUCAGUUACAGC  | GenePharma |
| 108 | PAPOLG   | GGAACGGAAUGAAUUUAUUAC  | GenePharma |
| 109 | PAPOLG   | ACCGCAUCUGAAUGGAAUGUC  | GenePharma |
| 110 | SMARCAL1 | GAGGCAGACAUCAGUUUAUCA  | GenePharma |
| 111 | SMARCAL1 | GCGCAAGAUAGUGGUGAUUGC  | GenePharma |
| 112 | EMILIN3  | GCUACGUAAAGGCUGAAUACC  | GenePharma |
| 113 | EMILIN3  | CAGUACUCAGACCCAAUACA   | GenePharma |
| 116 | BRWD1    | CGGAGCUGUACUCCUUAUCG   | GenePharma |
| 117 | BRWD1    | GGCGUAAUAUCCAAAUUAUG   | GenePharma |
| 118 | BRWD1    | GGCCGCUUGUUAUCUACA     | GenePharma |
| 123 | PFKFB4   | GUGGUCAAGACCUACAAAUCU  | GenePharma |
| 124 | PFKFB4   | CGAGGAAAUUCAGGAUAAUUA  | GenePharma |
| 125 | ACSL1    | GUGGGUGAUUAUUGAACAAAGG | GenePharma |
| 126 | ACSL1    | GAGCUGCGGAACUAUUUCAGG  | GenePharma |
| 127 | HTRA3    | GGUUCUGGCUUCAUCAUGUCA  | GenePharma |
| 128 | HTRA3    | CGGAUGCCAUCAUCAACUACG  | GenePharma |
| 129 | PPARGC1A | CUGGUACACAAGGCAAUAACU  | GenePharma |
| 130 | PPARGC1A | GUCGCAGUCACAACACUACA   | GenePharma |
| 131 | DOCK2    | GCCAGAUUAUGCAAUGUAUUC  | GenePharma |
| 132 | DOCK2    | GACCAUCAUAGGCUACUUUGA  | GenePharma |
| 133 | GABRA1   | CCGCUGCUAUUUGGAAUCUUU  | GenePharma |
| 134 | GABRA1   | GCCGUCAUUAACAAGAUGAACU | GenePharma |
| 135 | GDNF     | GCUGAGCAGUGACUAAAUAU   | GenePharma |
| 136 | GDNF     | AGGCUGGUGAGUGACAAAGUA  | GenePharma |
| 137 | GDNF     | AUGGCAGUGCUUCCUAGAAGA  | GenePharma |
| 138 | HCN1     | GAGGUGUCCACUCUGAUUUC   | GenePharma |
| 139 | HCN1     | CCAUCCCAGUGGAUUAUAUCU  | GenePharma |

|     |          |                       |            |
|-----|----------|-----------------------|------------|
| 140 | LIFR     | CUUGCGACUACGUCAUUAAGU | GenePharma |
| 141 | LIFR     | GGAAGUUCUACAAGUAAAUUC | GenePharma |
| 142 | MAP1B    | GACGCCCAAUGAGAUUAAAGU | GenePharma |
| 143 | MAP1B    | CUCCCGAUUCCUACUUAACU  | GenePharma |
| 144 | SPOCK1   | UGCCAUCUACCUGGAUAAGUA | GenePharma |
| 145 | SPOCK1   | CCGCUUUCGAGACGAUGAUUA | GenePharma |
| 146 | BTN3A3   | GGAGAGAUCUCGUUCUAUAAU | GenePharma |
| 147 | BTN3A3   | CUGCAACAGAGCAAGAAAUA  | GenePharma |
| 148 | DSE      | GGCAGGCAAACGCUAUAUUU  | GenePharma |
| 149 | DSE      | GGUCUAAAUACAAGCAUGACC | GenePharma |
| 150 | GCLC     | GGCAGACAAUGAGAUUUAAGC | GenePharma |
| 151 | GCLC     | GGAGGCUACUUCUAUAUUAGA | GenePharma |
| 152 | GCM1     | GAGGAAGAAUGACAUCUUG   | GenePharma |
| 153 | GCM1     | GGACAUUUAAUAGCUAACACU | GenePharma |
| 154 | KIAA0776 | GGACUAUUCAGUGCUAUUACC | GenePharma |
| 155 | KIAA0776 | GUGGUCGAGUAAACAUUGUUG | GenePharma |
| 156 | RUNX2    | CACGCUAUUAAAUCCAAAUUU | GenePharma |
| 157 | RUNX2    | GCAGUUCCCAAGCAUUUCAUC | GenePharma |
| 158 | ZSCAN16  | CCCAGGCAAUUCAGAAAGACG | GenePharma |
| 159 | ZSCAN16  | CCUGAGCAUUCUCCUAAAGA  | GenePharma |
| 160 | AMPH     | GGUGGAAACACUGCAUGAUUU | GenePharma |
| 161 | AMPH     | GUCGCUGCAUGAAGUCUAUGA | GenePharma |
| 162 | GHRHR    | GAGGAGGAAUCUACUUCUCC  | GenePharma |
| 163 | GHRHR    | CACCCAGAAUGUGACUUCAUC | GenePharma |
| 164 | HOXA1    | GACCAUAGGAUUACAACUUUC | GenePharma |
| 165 | HOXA1    | GCUAUGGCUCACAGAACUUCA | GenePharma |
| 166 | NRCAM    | GCUCCUUUAUUGGACAAUACA | GenePharma |
| 167 | NRCAM    | CAGGAACGCUCAUAAUUAACA | GenePharma |
| 168 | NRCAM    | GCACCACCAAACUGAAGUUUC | GenePharma |
| 169 | CDK14    | GGUUCUUGGAACACCAAUUU  | GenePharma |
| 170 | CDK14    | GGACACCUUUCACAGCUAUUU | GenePharma |
| 171 | CHRNA6   | GGUGGACAGAGUAUUUCUUUG | GenePharma |
| 172 | CHRNA6   | GCCACAAGCAAGAGAAGAUUA | GenePharma |
| 173 | FNTA     | GCAUCGACAAUGGGUUAUUCA | GenePharma |
| 174 | FNTA     | CCGGGAUGCUAUUGAGUUAAA | GenePharma |
| 175 | FUT10    | GGGCUAAUAUCAGGCUUCAGG | GenePharma |
| 176 | FUT10    | GUGGAGCAGAUGCUUGUUUCU | GenePharma |
| 177 | MTMR7    | CUCCCUCCAUGAGUGAUUUCC | GenePharma |
| 178 | MTMR7    | CUCCAGUUAUUGACCAGUUCA | GenePharma |
| 181 | ABCA1    | CUCCGAGUCAAGAAGUUAUUG | GenePharma |
| 182 | ABCA1    | GCACUAGGAUGGCAAUCAUGG | GenePharma |
| 185 | TAF1L    | GUGGAUUUCAGUAGUUACUCU | GenePharma |
| 186 | TAF1L    | CCCAGUUAUAAGAAGUUUGU  | GenePharma |
| 187 | TMEM2    | GGUGCUCGAGGUAAUUAUCA  | GenePharma |
| 188 | TMEM2    | GGAGACCCGUCUGUUAUUUCU | GenePharma |

|     |                  |                            |            |
|-----|------------------|----------------------------|------------|
| 189 | TMEM35           | GGAGCAACCCUCCUUAUAUGA      | GenePharma |
| 190 | TMEM35           | CGUGCUUACAAGAGCUAUGUU      | GenePharma |
| 191 | LRRIQ1           | GACACCCGCUUUGGAUAAACU      | GenePharma |
| 192 | LRRIQ1           | GGCUAGUUGAGGAAUCAAAUA      | GenePharma |
| 197 | DISC1            | GAGGUAAUAUCCUUAAGAUUA      | GenePharma |
| 198 | DISC1            | GGAAGAAAGUUAACGAUAUUG      | GenePharma |
| 199 | DISC1            | GCGUGACAUGCAUUCUUUACC      | GenePharma |
| 200 | DISC1            | GUGCCUUUACCUCAAGCUUUA      | GenePharma |
| 201 | CDKL4            | CCUCUGGACAAGUAGUAGCUGUAA   | Invitrogen |
| 202 | CDKL4            | GCACUAAGAGAAAUACGUAUGUUGA  | Invitrogen |
| 203 | CDKL4            | CCCAAGACAUCAAUCAAUCUUUAAA  | Invitrogen |
| 204 | CSNK1G3          | GGCUGACACAUUAAAGGAGAGGUAU  | Invitrogen |
| 205 | CSNK1G3          | UCUUCGUUAUGUAAGAAGGCUAGAU  | Invitrogen |
| 206 | CSNK1G3          | GACUUGUUUGACUUGUGUGACAGAA  | Invitrogen |
| 207 | NLK              | GGGAUGUAUCUUUGCAGAACUACUA  | Invitrogen |
| 208 | NLK              | GGAAGCAAUGAGGACAGCUUGUGAA  | Invitrogen |
| 209 | NLK              | GGCAGCCGUCAUACAGCAAUGCUA   | Invitrogen |
| 210 | CAMKV            | GCCAUCGGAGGUGACUGACAGAUAU  | Invitrogen |
| 211 | CAMKV            | GGGAUGAUUUUCGCAGGCAGCCAA   | Invitrogen |
| 212 | CAMKV            | GCUUUCAGGCAAUCCACCUUUCUAU  | Invitrogen |
| 213 | CIT              | GAGCAGUGACUUUCUUGAUCUGAUU  | Invitrogen |
| 214 | CIT              | CCCACUUCAACUCACUCGAAGUAAU  | Invitrogen |
| 215 | CIT              | ACGAGGAGCAGAAACUGGAGCUCAA  | Invitrogen |
| 216 | CDK14            | GCAUUCUGAGAACA AUGCUUGCAUU | Invitrogen |
| 217 | CDK14            | CCUCCACUGGCAAAGAGUCACCUEA  | Invitrogen |
| 218 | CDK14            | AGGCUGCCUUGAGCCACGAGUAUUU  | Invitrogen |
| 219 | PAK6             | ACUUCAACGUGGUGGAGAUGUACAA  | Invitrogen |
| 220 | PAK6             | GCUCAGAUCAGCAAAGACGUCCCUA  | Invitrogen |
| 221 | PAK6             | ACAUCGUCUCCCAAGUCAGGCUGAA  | Invitrogen |
| 222 | PKDCC            | CAGUAUCUGCAGAACUCCACGGCAA  | Invitrogen |
| 223 | PKDCC            | GAGUACCAGUGUAUCCCAGACAGCA  | Invitrogen |
| 224 | PKDCC            | CCAACGUGCUGCAGCUCUAUGGCUA  | Invitrogen |
| 225 | Negative Control | UUCUCCGAACGUGUCACGU        | GenePharma |



**Supplementary Table 13. RNAi screen of the mutated genes via statistical evaluation and scoring.**

| Genes                                           | Description                                       | No. of cell line | Cell line | Z score | -Log <sub>10</sub> P |
|-------------------------------------------------|---------------------------------------------------|------------------|-----------|---------|----------------------|
| <b>Loss of function promotes cell viability</b> |                                                   |                  |           |         |                      |
| VCAM1                                           | Vascular cell adhesion molecule 1                 | 4                | MHCC- LM3 | 5.54    | 3.02                 |
|                                                 |                                                   |                  | Huh-7     | 5.4     | 3.76                 |
|                                                 |                                                   |                  | MHCC-97H  | 5.1     | 4.13                 |
|                                                 |                                                   |                  | MHCC-97L  | 7.02    | 2.36                 |
| TMEM2                                           | Transmembrane protein 2                           | 4                | MHCC- LM3 | 21.87   | 2.41                 |
|                                                 |                                                   |                  | PLC/PRF/5 | 17.34   | 3.74                 |
|                                                 |                                                   |                  | MHCC-97L  | 5.74    | 4.9                  |
|                                                 |                                                   |                  | MHCC-97H  | 18.02   | 4.33                 |
| LHX9                                            | LIM homeobox 9                                    | 3                | Focus     | 6.78    | 2.16                 |
|                                                 |                                                   |                  | MHCC-97L  | 6.22    | 4.17                 |
|                                                 |                                                   |                  | MHCC-97H  | 10.62   | 10.61                |
| BTN3A3                                          | Butyrophilin, subfamily 3, member A3              | 2                | MHCC- LM3 | 8.43    | 2.53                 |
|                                                 |                                                   |                  | MHCC-97H  | 6.64    | 3.5                  |
| ACSL1                                           | Acyl-CoA synthetase long-chain family member 1    | 2                | Huh-7     | 40.1    | 4.44                 |
|                                                 |                                                   |                  | MHCC-97H  | 14.18   | 4.02                 |
| DSE                                             | Dermatan sulfate epimerase                        | 2                | MHCC- LM3 | 6.53    | 2.23                 |
|                                                 |                                                   |                  | MHCC-97L  | 8.94    | 2.62                 |
| FAHD1                                           | Fumarylacetoacetate hydrolase domain containing 1 | 2                | MHCC- LM3 | 5.51    | 2.61                 |
|                                                 |                                                   |                  | Focus     | 14.76   | 3.87                 |
| GPATCH8                                         | G patch domain containing 8                       | 2                | MHCC- LM3 | 15.47   | 2.24                 |
|                                                 |                                                   |                  | MHCC-97H  | 5.87    | 2.85                 |
| LRRIQ1                                          | Leucine-rich repeats and IQ motif containing 1    | 2                | MHCC- LM3 | 20.71   | 3.07                 |

|          |                                                                                       |   |           |       |      |
|----------|---------------------------------------------------------------------------------------|---|-----------|-------|------|
|          |                                                                                       |   | MHCC-97L  | 6.6   | 5.48 |
| NRXN2    | Neurexin 2                                                                            | 2 | MHCC-LM3  | 7.65  | 2.14 |
|          |                                                                                       |   | MHCC-97L  | 10.98 | 3.3  |
| PAK6     | P21(CDKN1A)-activated kinase 6                                                        | 2 | Huh-7     | 12.77 | 2.23 |
|          |                                                                                       |   | MHCC-97L  | 7.29  | 2.03 |
| ATL1     | Atlastin GTPase 1                                                                     | 1 | MHCC-97H  | 6.2   | 3.34 |
| COTL1    | Coactosin-like 1 (Dictyostelium)                                                      | 1 | MHCC- LM3 | 6.01  | 3.89 |
| DHPS     | Deoxyhypusine synthase                                                                | 1 | MHCC-97L  | 12.18 | 2.7  |
| DISC1    | Disrupted in schizophrenia 1                                                          | 1 | MHCC- LM3 | 6.71  | 5.28 |
| FNTA     | Farnesyltransferase, CAAX box, alpha                                                  | 1 | MHCC-97H  | 5.05  | 2.01 |
| GCM1     | Glial cells missing homolog 1 (Drosophila)                                            | 1 | MHCC-97L  | 10.06 | 3.22 |
| GDNF     | Glial cell derived neurotrophic factor                                                | 1 | MHCC- LM3 | 6.05  | 3.61 |
| GPS1     | G protein pathway suppressor 1                                                        | 1 | PLC/PRF/5 | 8.73  | 2.18 |
| HCN1     | Hyperpolarization activated cyclic nucleotide-gated potassium channel 1               | 1 | WRL68     | 6.48  | 2.55 |
| KCNJ9    | Potassium inwardly-rectifying channel, subfamily J, member 9                          | 1 | PLC/PRF/5 | 9.07  | 3.54 |
| KIAA0776 | KIAA0776                                                                              | 1 | MHCC- LM3 | 7.62  | 6    |
| NFASC    | Neurofascin homolog (chicken)                                                         | 1 | PLC/PRF/5 | 36.36 | 6.02 |
| OR5A2    | Olfactory receptor, family 5, subfamily A, member 2                                   | 1 | MHCC- LM3 | 7.21  | 3.84 |
| PIK3AP1  | Phosphoinositide-3-kinase adaptor protein 1                                           | 1 | PLC/PRF/5 | 7.13  | 2.21 |
| PPARGC1A | Peroxisome proliferator-activated receptor gamma, coactivator 1 alpha                 | 1 | MHCC-97H  | 9.58  | 3.24 |
| RUNX2    | Runt-related transcription factor 2                                                   | 1 | MHCC-97H  | 53.19 | 3.72 |
| TAF1L    | TAF1 RNA polymerase II, TATA box binding protein (TBP)-associated factor, 210kDa-like | 1 | MHCC- LM3 | 18.5  | 2.52 |

|         |                                           |   |       |      |      |
|---------|-------------------------------------------|---|-------|------|------|
| ZSCAN16 | Zinc finger and SCAN domain containing 16 | 1 | WRL68 | 5.98 | 3.66 |
|---------|-------------------------------------------|---|-------|------|------|

---

## Loss of function suppresses cell viability

---

|         |                                                     |   |           |        |      |
|---------|-----------------------------------------------------|---|-----------|--------|------|
|         |                                                     |   | WRL68     | -8.67  | 4.11 |
| CDK14   | Cyclin-dependent kinase 14                          | 4 | Huh-7     | -7.42  | 2.78 |
|         |                                                     |   | MHCC-97L  | -16.73 | 2.61 |
|         |                                                     |   | HCC-LM3   | -8.4   | 2.13 |
|         |                                                     |   | Huh-7     | -8.13  | 2.5  |
| HOXA1   | Homeobox A1                                         | 4 | Focus     | -7.1   | 2.53 |
|         |                                                     |   | PLC/PRF/5 | -6.24  | 4.34 |
|         |                                                     |   | MHCC-97L  | -6.67  | 2.48 |
|         |                                                     |   | PLC/PRF/5 | -10.67 | 4.81 |
| TMEM35  | Transmembrane protein 35                            | 4 | MHCC-97L  | -11.56 | 2.5  |
|         |                                                     |   | MHCC-97H  | -14.33 | 2.93 |
|         |                                                     |   | HCC-LM3   | -12.41 | 3.01 |
|         |                                                     |   | Huh-7     | -10.25 | 2.54 |
| ELL     | Elongation factor RNA polymerase II                 | 4 | Focus     | -6.22  | 3.34 |
|         |                                                     |   | MHCC-97H  | -9.89  | 2.72 |
|         |                                                     |   | HCC-LM3   | -8.39  | 3.43 |
|         |                                                     |   | Huh-7     | -6.35  | 2.55 |
| CSNK1G3 | Casein kinase 1, gamma 3                            | 3 | MHCC-97L  | -11.84 | 2.8  |
|         |                                                     |   | MHCC-97H  | -9.49  | 3.18 |
|         |                                                     |   | PLC/PRF/5 | -27.5  | 2.13 |
| ABCA1   | ATP-binding cassette, sub-family A (ABC1), member 1 | 3 | MHCC-97L  | -20.89 | 3.54 |
|         |                                                     |   | MHCC-97H  | -57.91 | 2.8  |
| CHRNA6  | Cholinergic receptor, nicotinic, alpha 6            | 2 | Huh-7     | -16.68 | 2.65 |

|          |                                                                                                |   |           |        |      |
|----------|------------------------------------------------------------------------------------------------|---|-----------|--------|------|
|          |                                                                                                |   | MHCC-LM3  | -5.53  | 2.83 |
| ETHE1    | Ethylmalonic encephalopathy 1                                                                  | 2 | Huh-7     | -6.35  | 2.33 |
|          |                                                                                                |   | PLC/PRF/5 | -17.9  | 2.67 |
| GHRHR    | Growth hormone releasing hormone receptor                                                      | 2 | Focus     | -22.31 | 6    |
|          |                                                                                                |   | PLC/PRF/5 | -10.65 | 5.01 |
| IQGAP1   | IQ motif containing GTPase activating protein 1                                                | 2 | MHCC-97L  | -13.81 | 2.86 |
|          |                                                                                                |   | MHCC-97H  | -12.84 | 2.03 |
| NLK      | Nemo-like kinase                                                                               | 2 | Focus     | -9.22  | 3.03 |
|          |                                                                                                |   | MHCC-97L  | -9.28  | 2.19 |
| NWD1     | NACHT and WD repeat domain containing 1                                                        | 2 | WRL68     | -11.38 | 2.1  |
|          |                                                                                                |   | MHCC-97H  | -43.35 | 2.51 |
| OR9Q1    | Olfactory receptor, family 9, subfamily Q, member 1                                            | 2 | Huh-7     | -12.87 | 2.24 |
|          |                                                                                                |   | MHCC-LM6  | -11.84 | 2.74 |
| SMARCAL1 | SWI/SNF related, matrix associated, actin dependent regulator of chromatin, subfamily a-like 1 | 2 | WRL68     | -13.75 | 8.92 |
|          |                                                                                                |   | MHCC-97H  | -29.17 | 2.55 |
| TBX19    | T-box 19                                                                                       | 2 | MHCC-LM3  | -6.69  | 2.04 |
|          |                                                                                                |   | MHCC-LM6  | -6.52  | 3.69 |
| ARID2    | AT rich interactive domain 2 (ARID, RFX-like)                                                  | 1 | MHCC-LM3  | -7.91  | 3.54 |
| C1orf77  | Chromosome 1 open reading frame 77                                                             | 1 | MHCC-LM3  | -6.37  | 2.6  |
| CCBE1    | Collagen and calcium binding EGF domains 1                                                     | 1 | WRL68     | -11.74 | 4.68 |
| CDHR1    | Cadherin-related family member 1                                                               | 1 | Huh-7     | -20.24 | 2.22 |
| CIT      | Citron (rho-interacting, serine/threonine kinase 21)                                           | 1 | MHCC-97L  | -10.42 | 2.77 |
| EMILIN3  | Elastin microfibril interfacier 3                                                              | 1 | WRL68     | -16.63 | 4.69 |
| FAHD1    | Fumarylacetoacetate hydrolase domain containing 1                                              | 1 | MHCC-97L  | -24.27 | 2.67 |
| FUT10    | Fucosyltransferase 10 (alpha (1,3) fucosyltransferase)                                         | 1 | WRL68     | -17.09 | 7.71 |
| GABRA1   | Gamma-aminobutyric acid (GABA) A receptor, alpha                                               | 1 | MHCC-LM6  | -5.68  | 3.07 |

1

|          |                                                                                          |   |           |        |      |
|----------|------------------------------------------------------------------------------------------|---|-----------|--------|------|
| GCM1     | Glial cells missing homolog 1 (Drosophila)                                               | 1 | MHCC-LM6  | -20.19 | 4.24 |
| GPS1     | G protein pathway suppressor 1                                                           | 1 | WRL68     | -7.02  | 3.55 |
| HMCN1    | Hemicentin 1                                                                             | 1 | MHCC-LM6  | -14.18 | 3.85 |
| KIAA1409 | KIAA1409                                                                                 | 1 | MHCC-97H  | -14.88 | 2.13 |
| LHX9     | LIM homeobox 9                                                                           | 1 | WRL68     | -6.61  | 2.67 |
| MAP1B    | Microtubule-associated protein 1B                                                        | 1 | PLC/PRF/5 | -6.67  | 2.43 |
| NRCAM    | Neuronal cell adhesion molecule                                                          | 1 | MHCC-LM3  | -8.51  | 2.12 |
| OR2G3    | Olfactory receptor, family 2, subfamily G, member 3                                      | 1 | MHCC-LM3  | -10.54 | 2.1  |
| OR2M5    | Olfactory receptor, family 2, subfamily M, member 5                                      | 1 | MHCC-97H  | -24.65 | 2.4  |
| RUNX2    | Runt-related transcription factor 2                                                      | 1 | WRL68     | -11.94 | 6.65 |
| TAF1L    | TAF1 RNA polymerase II, TATA box binding protein<br>(TBP)-associated factor, 210kDa-like | 1 | MHCC-LM3  | -5.39  | 2.04 |
| TASP1    | Taspase, threonine aspartase, 1                                                          | 1 | MHCC-LM3  | -11.16 | 2.01 |
| TRIM9    | Tripartite motif-containing 9                                                            | 1 | WRL68     | -5.36  | 2.01 |
| ZNF671   | Zinc finger protein 671                                                                  | 1 | Focus     | -8.92  | 5.68 |

**Supplementary Table 14. Some genes identified in RNAi screen were further evaluated in HCC cell lines to determine their genotypes and knockdown effects.**

| <b>Genes</b> | <b>Genotype of HCC cell lines</b> |          | <b>Whether target gene was significantly knockdowned by siRNAs in corresponding cell line</b> |
|--------------|-----------------------------------|----------|-----------------------------------------------------------------------------------------------|
| VCAM1        | MHCC- LM3                         | Wildtype | Yes                                                                                           |
|              | Huh-7                             | Wildtype | Yes                                                                                           |
|              | MHCC-97H                          | Wildtype | Yes                                                                                           |
|              | MHCC-97L                          | Wildtype | Yes                                                                                           |
|              | MHCC- LM3                         | Wildtype | Yes                                                                                           |
| TMEM2        | PLC/PRF/5                         | Wildtype | Yes                                                                                           |
|              | MHCC-97L                          | Wildtype | Yes                                                                                           |
|              | MHCC-97H                          | Wildtype | Yes                                                                                           |
| LHX9         | Focus                             | Wildtype |                                                                                               |
|              | MHCC-97L                          | Wildtype | No detected expression                                                                        |
|              | MHCC-97H                          | Wildtype |                                                                                               |
| CDK14        | WRL68                             | Wildtype | Yes                                                                                           |
|              | Huh-7                             | Wildtype | Yes                                                                                           |
|              | MHCC-97L                          | Wildtype | Yes                                                                                           |
|              | MHCC-LM3                          | Wildtype | Yes                                                                                           |
|              | Huh-7                             | Wildtype | Yes                                                                                           |
| HOXA1        | Focus                             | Wildtype | Yes                                                                                           |
|              | PLC/PRF/5                         | Wildtype | Yes                                                                                           |
|              | MHCC-97L                          | Wildtype | Yes                                                                                           |
|              | PLC/PRF/5                         | Wildtype | Yes                                                                                           |
| TMEM35       | MHCC-97L                          | Wildtype | Yes                                                                                           |
|              | MHCC-97H                          | Wildtype | Yes                                                                                           |
|              | MHCC-LM3                          | Wildtype | Yes                                                                                           |
| ELL          | Huh-7                             | Wildtype | Yes                                                                                           |
|              | Focus                             | Wildtype | Yes                                                                                           |
|              | MHCC-97H                          | Wildtype | Yes                                                                                           |
|              | MHCC-LM3                          | Wildtype | Yes                                                                                           |
| CSNK1G3      | Huh-7                             | Wildtype | Yes                                                                                           |
|              | MHCC-97L                          | Wildtype | Yes                                                                                           |
|              | MHCC-97H                          | Wildtype | Yes                                                                                           |
| ABCA1        | PLC/PRF/5                         | Wildtype |                                                                                               |
|              | MHCC-97L                          | Wildtype | No significant knockdown                                                                      |
|              | MHCC-97H                          | Wildtype |                                                                                               |
